# Supplementary material
Source: PubMed Central journal article supplement (PMC5373477)
Supplement: NIHMS853568-supplement-Supplemental.pdf [file NIHMS853568-supplement-Supplemental.pdf]

# Accessing Elaborated 2,1-Borazaronaphthalene Cores using Photoredox/Nickel Dual-Catalytic Functionalization

Matthieu Jouffroy, Geraint H. M. Davies, and Gary A. Molander\*

*Roy and Diana Vagelos Laboratories, Department of Chemistry, University of Pennsylvania,  
231 South 34<sup>th</sup> Street, Philadelphia, Pennsylvania 19104-6323, United States*

\*To whom correspondence should be addressed. E-mail: gmolandr@sas.upenn.edu

## Supporting Information

|                                                                     |     |
|---------------------------------------------------------------------|-----|
| General considerations .....                                        | S2  |
| Procedure for the synthesis of organobis(catecholato)silicate ..... | S2  |
| Procedure for synthesis of 2,1-borazaronaphthalenes .....           | S3  |
| Procedure for the bromination of 2,1-borazaronaphthalenes .....     | S3  |
| General procedure for photoredox cross-coupling reactions .....     | S3  |
| Compound characterization data .....                                | S5  |
| Spectral data .....                                                 | S20 |

## General considerations

All reactions were carried out under an inert atmosphere of nitrogen or argon in oven-dried glassware, unless otherwise noted. Conventional solvents (THF, Et<sub>2</sub>O, CH<sub>2</sub>Cl<sub>2</sub>, toluene, CPME) were dried using a J. C. Meyer solvent system. DMF (99.9%, extra dry) was used as received. NEt<sub>3</sub> and (*i*-Pr)<sub>2</sub>NH were distilled prior to use and stored over activated molecular sieves. Catechol (99%) was recrystallized from heptane. [NiCl<sub>2</sub>(dme)] was purchased from commercial sources, and all other reagents were purchased commercially and used as received, unless otherwise noted. Column chromatography was performed by Combiflash<sup>(R)</sup> using RediSep Rf Gold Normal-Phase Silica<sup>(R)</sup> columns. Photoredox reactions were irradiated with blue LED strips, and the temperature was controlled using an external fan. Melting points (°C) are uncorrected. Mass spectra (ESI- or CI-TOF) were recorded using CH<sub>2</sub>Cl<sub>2</sub>, MeCN or MeOH as the solvent. NMR Spectra (<sup>1</sup>H, <sup>13</sup>C {<sup>1</sup>H}, <sup>11</sup>B, <sup>19</sup>F {<sup>1</sup>H}) were performed at 298 K. <sup>1</sup>H (500.4 MHz) and <sup>13</sup>C {<sup>1</sup>H} (125.8 MHz) NMR chemical shifts are reported relative to internal TMS (δ = 0.00 ppm) or to residual protiated solvent. <sup>11</sup>B (128.4 MHz) and <sup>19</sup>F {<sup>1</sup>H} NMR (470.8 MHz) chemical shifts were referenced to external BF<sub>3</sub>•Et<sub>2</sub>O (0.0 ppm) and CFCl<sub>3</sub> (0.0 ppm), respectively. Data are presented as follows: chemical shift (ppm), multiplicity (s = singlet, d = doublet, t = triplet, q = quartet, sept = septet, m = multiplet, br = broad), coupling constant *J* (Hz) and integration. Ammonium organobis(catecholato)silicates<sup>1</sup> and 2,1-borazaronaphthalenes<sup>2</sup> were prepared according to literature procedures.

## Procedure for synthesis of organobis(catecholato)silicates

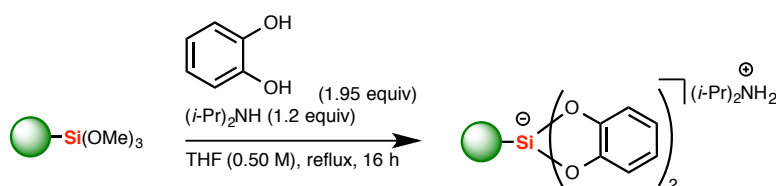

Catechol (1.95 equiv) was introduced into a microwave vial with a stirring bar. The vial was sealed with a Teflon-coated septum cap, then purged with N<sub>2</sub> and evacuated four times. THF and (*i*-Pr)<sub>2</sub>NH (1.2 equiv) were introduced, and the resulting light pink solution was stirred at rt for 15 min before addition of organotrimethoxysilane derivative (1 equiv) (*Note: no base was added for the synthesis of alkylamine containing silane*). The reaction mixture was refluxed for 16 h. The vial was then cooled to rt, and the reaction mixture concentrated to a thick slurry before Et<sub>2</sub>O (0.1 M) was introduced. The mixture was then sonicated 15 min to allow the corresponding product to precipitate as a white powder. The vial was finally unsealed, and the precipitate was collected by vacuum filtration. The filter cake was washed with Et<sub>2</sub>O to afford silicate **11**. If required, the product was further purified by dissolving in CH<sub>2</sub>Cl<sub>2</sub> followed by precipitation with pentane and vacuum filtration.

<sup>1</sup> (a) Jouffroy, M.; Primer, D. N.; Molander, G. A. *J. Am. Chem. Soc.* **2016**, 138, 475. (b) Patel, N. R.; Kelly, C. B.; Jouffroy, M.; Molander, G. A. *Org. Lett.*, DOI: 10.1021/acs.orglett.6b00024.

<sup>2</sup> Wisniewski, S. R.; Guenther, C. L.; Argintaru, O. A.; Molander, G. A. *J. Org. Chem.* **2014**, 79, 365.

## Procedure for synthesis of 2,1-borazonaphthalenes

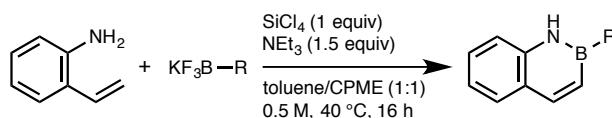

Aryltrifluoroborate (1.0 equiv) was introduced into a microwave vial with a stirring bar. The vial was sealed with a Teflon-coated septum cap, then purged with  $\text{N}_2$  and evacuated four times. CPME/toluene mixture (0.5 M, 1:1, *v/v*) and 2-aminostyrene (1.2 equiv) were introduced *via* syringe, followed by  $\text{NEt}_3$  (1.5 equiv) and  $\text{SiCl}_4$  (1.0 equiv). The resulting suspension was heated to 40 °C under vigorous stirring for 16 h. The vial was finally cooled to rt, and the reaction mixture filtered through a plug of silica and flushed with hexanes/EtOAc mixture (20 times solvent volume, 4:1, *v/v*). Solvents were removed *in vacuo* to obtain product **10** in pure form. If required, the residue was further purified by column chromatography on silica gel, eluting with  $\text{CH}_2\text{Cl}_2$  and hexanes.

## Procedure for the bromination of 2,1-borazonaphthalenes

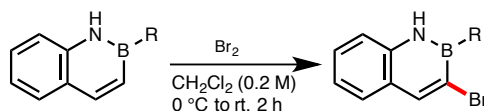

The 2,1-borazonaphthalenes **10** (1.0 equiv) were introduced into a round-bottom flask equipped with a stirring bar. The flask was sealed with a rubber septum, then purged with inert gas and evacuated four times.  $\text{CH}_2\text{Cl}_2$  (0.2 M) was introduced, and the flask was cooled to 0 °C before  $\text{Br}_2$  (1.1 equiv) in  $\text{CH}_2\text{Cl}_2$  (0.2 M) was added over 2 h. After addition, the reaction completion was monitored by HPLC. The crude reaction mixture condensed then purified by column chromatography on silica gel, eluting with  $\text{CH}_2\text{Cl}_2$  and hexanes to afford product **1** in pure form.

## General procedure for photoredox cross-coupling reactions

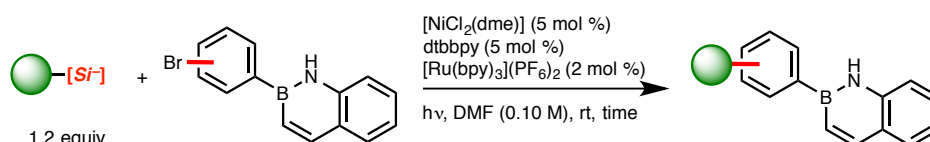

**0.5 mmol scale reaction:** To an 8 mL clear glass vial equipped with a Teflon-coated magnetic stir bar was added 4,4'-di-*tert*-butyl-2,2'-bipyridine (6.7 mg, 0.025 mmol), and  $[\text{NiCl}_2(\text{dme})]$  (5.5 mg, 0.025 mmol). The vial was capped and purged with nitrogen, then 1.5 mL of THF was introduced. The resulting suspension was heated briefly with a heat gun until the nickel complex and ligand were fully solubilized, yielding a pale green solution. The solution was cooled in an ice bath, resulting in the immediate precipitation of an evergreen solid. Solvents were then evaporated *in vacuo* to give a fine coating of the ligated nickel complex. Once dry, brominated azaborine **1** (0.5 mmol, 1.0 equiv) (liquid aryl bromides were added at the time of solvent addition), organosilicates (0.6 mmol, 1.2 equiv), and  $[\text{Ru}(\text{bpy})_3](\text{PF}_6)_2$  (8.6 mg, 0.01 mmol) were added in succession. The vial was then capped and purged four times. Under inert atmosphere, DMF (5 mL) was introduced. The vial containing all the reagents was further sealed with parafilm and stirred approximately 4 cm away from the LED strips (Figure S-1). A fan was blown across the reaction setup to suppress the heat generated by the latter (the reaction temperatures were estimated to be ~30 °C). After

12 h, an aliquot was taken and analyzed by HPLC to monitor reaction completion. The crude reaction mixture was poured into a separatory funnel and diluted with H<sub>2</sub>O (20 mL). The resulting suspension was extracted with EtOAc (3 × 10 mL), and the combined organic extracts were washed with a saturated solution of Na<sub>2</sub>CO<sub>3</sub> (2 × 20 mL) then H<sub>2</sub>O (20 mL), dried (MgSO<sub>4</sub>) and concentrated. The residue was purified by column chromatography on silica gel, eluting with EtOAc and hexanes, to obtain products in pure form. In the case of primary and secondary alkylamine-containing compounds, the residue was purified by column chromatography on silica gel, eluting with MeOH and CH<sub>2</sub>Cl<sub>2</sub> containing NH<sub>4</sub>OH (1 %, v/v).

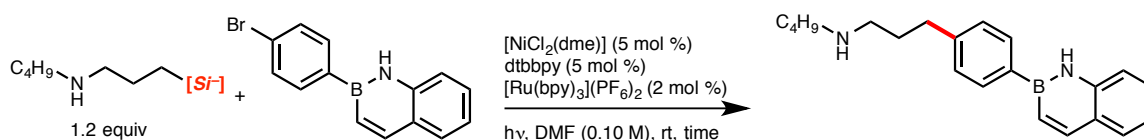

**Gram scale reaction:** To a 100 mL round bottom flask equipped with a Teflon-coated magnetic stir bar was added [NiCl<sub>2</sub>(dme)] (39 mg, 0.18 mmol) and 4,4'-di-*tert*-butyl-2,2'-bipyridine (47 mg, 0.18 mmol). The flask was capped and purged with nitrogen, then 3.0 mL of THF was introduced. The resulting suspension was heated briefly with a heat gun until the nickel and ligand were fully solubilized, yielding a pale green solution. The solution was cooled in an ice bath, resulting in the immediate precipitation of an evergreen solid. Solvents were then evaporated in vacuo to give a fine coating of the ligated nickel complex. Once dry, azaborine **1a** (1.000 g, 3.52 mmol), bis(catecholato)3-(butylammonio)propyl silicate **11d** (1.949 g, 4.23 mmol) and [Ru(bpy)<sub>3</sub>](PF<sub>6</sub>)<sub>2</sub> (61 mg, 0.07 mmol) were added in succession. The vial was then capped and purged four times. Under inert atmosphere, DMF (35 mL) was introduced. The vial containing all the reagents was further sealed with parafilm and stirred in the presence of coiled blue LEDs (Figure S-1). A fan was blown across the reaction setup to suppress the heat generated by the LEDs, stabilizing at 30 °C after 1 h. Reaction completion was monitored by sampling the reaction mixture and analyzing by HPLC. After completion (4 h), the crude reaction mixture was diluted with EtOAc (40 mL), filtered through approximately 6 cm x 4 cm cylindrical plug of Celite, washing with EtOAc (40 mL). The resulting solution was concentrated, retaken in EtOAc (50 mL), poured into a separatory funnel and washed with a saturated solution of Na<sub>2</sub>CO<sub>3</sub> (2 × 40 mL) then H<sub>2</sub>O (40 mL), dried (MgSO<sub>4</sub>) and concentrated. The residue was purified by column chromatography on silica gel, eluting with MeOH and CH<sub>2</sub>Cl<sub>2</sub> containing NH<sub>4</sub>OH (1%, v/v), to obtain azaborine **2m** in pure form (1070 mg, 96%).

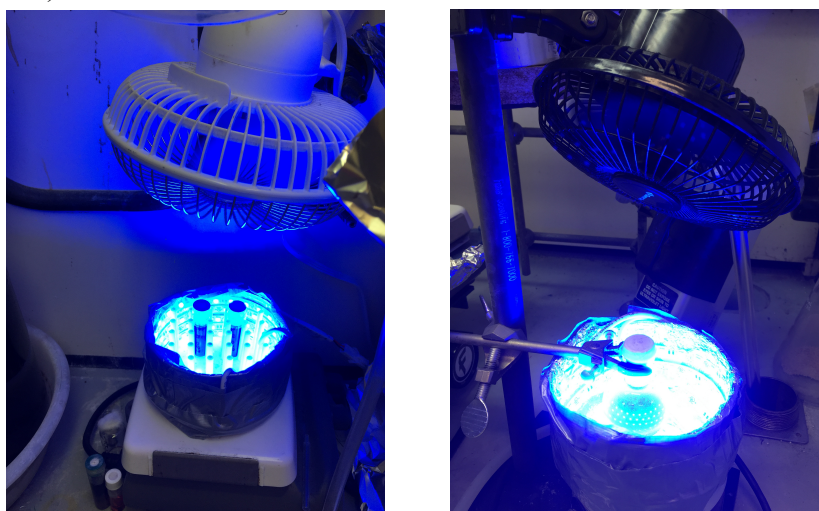

**Figure S-1.** 0.5 mmol (left) and gram (right) scale photoredox cross-coupling reaction set-up.

## Compound Characterization Data

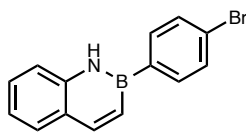

**2-(4-Bromophenyl)-2,1-borazanaphthalene (1a):** obtained as an off white powder (2.05 g, 72%, 10.00 mmol scale); mp = 158 °C;  $^1\text{H}$  NMR (DMSO- $d_6$ , 500.4 MHz):  $\delta$  10.5 (br s, 1 H), 8.15 (d,  $J$  = 12.0 Hz, 1 H), 8.02 (d,  $J$  = 8.2 Hz, 2 H), 7.72–7.64 (m, 4 H), 7.47 (ddd,  $J$  = 7.6, 7.5, 1.3 Hz, 1 H), 7.22 (dd,  $J$  = 11.6, 1.3 Hz, 1 H), 7.17 (ddd,  $J$  = 7.4, 7.5, 1.3 Hz, 1 H) ppm;  $^{13}\text{C}$  { $^1\text{H}$ } NMR (DMSO- $d_6$ , 125.8 MHz):  $\delta$  145.9, 141.2, 135.8, 131.2, 129.5, 128.8, 125.5, 123.9, 121.1, 119.1 ppm;  $^{11}\text{B}$  NMR (acetone, 128.4 MHz):  $\delta$  34.0 ppm; IR:  $\nu$  = 1612, 1576, 1557, 1490, 1434, 1390, 1345, 1280, 1206, 1134, 1077, 1067, 1007, 974, 808, 758  $\text{cm}^{-1}$ ; HRMS (ESI)  $m/z$  calc. for  $\text{C}_{14}\text{H}_{11}\text{BBrCIN}$  [ $\text{M} + \text{Cl}$ ] $^-$  317.9856, found 317.9857.

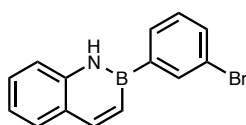

**2-(3-Bromophenyl)-2,1-borazanaphthalene (1b):** obtained as an off white powder (1.11 g, 56%, 7.00 mmol scale); mp = 75 °C;  $^1\text{H}$  NMR (acetone- $d_6$ , 500.4 MHz):  $\delta$  9.93 (br s, 1 H), 8.21 (d,  $J$  = 10.7 Hz, 1 H), 8.17 (s, 1 H), 8.00 (d,  $J$  = 6.7 Hz, 1 H), 7.70 (d,  $J$  = 8.1 Hz, 1 H), 7.68 (d,  $J$  = 8.1 Hz, 1 H), 7.58 (d,  $J$  = 7.4 Hz, 1 H), 7.47 (ddd,  $J$  = 7.4, 7.4, 1.2 Hz, 1 H), 7.39 (t,  $J$  = 7.7 Hz, 1 H), 7.27 (dd,  $J$  = 7.4, 1.5 Hz, 1 H), 7.20 (ddd,  $J$  = 8.2, 6.7, 1.0 Hz, 1 H) ppm;  $^{13}\text{C}$  { $^1\text{H}$ } NMR (acetone- $d_6$ , 125.8 MHz):  $\delta$  145.8, 140.9, 135.4, 132.0, 131.9, 130.0, 129.1, 128.4, 125.7, 122.5, 121.0, 118.6 ppm;  $^{11}\text{B}$  NMR (acetone, 128.4 MHz):  $\delta$  33.7 ppm; IR:  $\nu$  = 1612, 1594, 1560, 1550, 1482, 1432, 1394, 1347, 1275, 1211, 1121, 1074, 987, 816, 786, 763  $\text{cm}^{-1}$ ; HRMS (ESI)  $m/z$  calc. for  $\text{C}_{14}\text{H}_{10}\text{BBrN}$  [ $\text{M} - \text{H}$ ] $^-$  282.0090, found 282.0100.

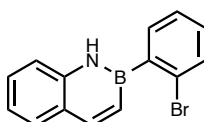

**2-(2-Bromophenyl)-2,1-borazanaphthalene (1c):** obtained as a viscous colorless oil (857 mg, 51%, 6.00 mmol scale);  $^1\text{H}$  NMR ( $\text{CDCl}_3$ , 500.4 MHz):  $\delta$  8.42 (br s, 1 H), 8.15 (d,  $J$  = 11.4 Hz, 1 H), 7.68 (d,  $J$  = 8.0 Hz, 1 H), 7.64–7.59 (m, 2 H), 7.46 (ddd,  $J$  = 7.5, 7.6, 1.3 Hz, 1 H), 7.37 (ddd,  $J$  = 7.5, 7.4, 1.0 Hz, 1 H), 7.33 (d,  $J$  = 8.1 Hz, 1 H), 7.27–7.20 (m, 2 H), 7.16 (dd,  $J$  = 11.7, 2.3 Hz, 1 H) ppm;  $^{13}\text{C}$  { $^1\text{H}$ } NMR ( $\text{CDCl}_3$ , 125.8 MHz):  $\delta$  145.3, 139.6, 135.7, 132.6, 130.3, 129.5, 128.5, 127.4, 126.9, 12.4, 121.5, 118.5 ppm;  $^{11}\text{B}$  NMR (acetone, 128.4 MHz):  $\delta$  34.9 ppm; IR:  $\nu$  = 1614, 1595, 1583, 1559, 1434, 1414, 1386, 1346, 1285, 1211, 1200, 1015, 978, 807, 748, 727  $\text{cm}^{-1}$ ; HRMS (ESI)  $m/z$  calc. for  $\text{C}_{14}\text{H}_{12}\text{BBrN}$  [ $\text{M} + \text{H}$ ] $^+$  284.0246, found 284.0250.

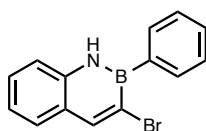

**3-Bromo-2-phenyl-2,1-borazanaphthalene (1d):** obtained as an off white powder (542 mg, 95%, 2.00 mmol scale) from 2-phenyl-2,1-borazanaphthalene;<sup>2</sup> mp = 81 °C; <sup>1</sup>H NMR (CDCl<sub>3</sub>, 500.4 MHz): δ 8.46 (s, 1 H), 8.04 (br s, 1 H), 7.93–7.88 (m, 2 H), 7.62 (d, *J* = 7.8 Hz, 1 H), 7.50–7.46 (m, 4 H), 7.31 (d, *J* = 8.3 Hz, 1 H), 7.24 (t, *J* = 7.6 Hz, 1 H) ppm. Characterization data for this compound matched that reported in the literature.<sup>3</sup>

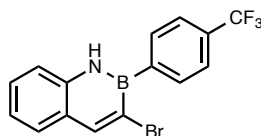

**3-Bromo-2-(4-(trifluoromethyl)phenyl)-2,1-borazanaphthalene (1e):** obtained as an off white powder (294 mg, 67%, 1.25 mmol scale) from **10a**; mp = 104 °C; <sup>1</sup>H NMR (acetone-*d*<sub>6</sub>, 500.4 MHz): δ 10.07 (br s, 1 H), 8.55 (s, 1 H), 8.07 (d, *J* = 7.9 Hz, 2 H), 7.77–7.67 (m, 4 H), 7.55–7.51 (m, 1 H), 7.28–7.24 (m, 1 H) ppm; <sup>13</sup>C {<sup>1</sup>H} NMR (acetone-*d*<sub>6</sub>, 125.8 MHz): δ 147.0, 139.9, 134.1, 130.1 (q, *J* = 31.7 Hz), 129.0, 128.6, 125.1, 124.6 (q, *J* = 270.9 Hz), 123.8 (q, *J* = 3.8 Hz), 122.0, 118.7 ppm; <sup>19</sup>F {<sup>1</sup>H} NMR (acetone-*d*<sub>6</sub>, 470.8 MHz): δ –63.1 ppm; <sup>11</sup>B NMR (acetone, 128.4 MHz): δ 33.4 ppm; IR: ν = 3321, 1554, 1328, 1225, 1166, 1156, 1130, 1118, 1104, 1070, 1007, 919, 847, 833, 761, 747, 719 cm<sup>-1</sup>; HRMS (ESI) *m/z* calc. for C<sub>15</sub>H<sub>9</sub>BBrF<sub>3</sub>N [M – H]<sup>-</sup> 349.9964, found 349.9955.

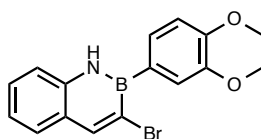

**3-Bromo-2-(2,3-dihydro-1,4-benzodioxin-6-yl)-2,1-borazanaphthalene (1f):** obtained as an off white powder (99 mg, 23%, 1.25 mmol scale) from **10b**; mp = 155 °C; <sup>1</sup>H NMR (acetone-*d*<sub>6</sub>, 500.4 MHz): δ 9.86 (br s, 1 H), 8.49 (s, 1 H), 7.72 (d, *J* = 7.8 Hz, 1 H), 7.62 (d, *J* = 8.4 Hz, 1 H), 7.50 (ddd, *J* = 8.2, 7.1, 1.3 Hz, 1 H), 7.24 (ddd, *J* = 8.2, 7.0, 1.1 Hz, 1 H), 7.09 (dd, *J* = 4.8, 3.8 Hz, 1 H), 6.90–6.83 (m, 2 H), 4.25 (s, 4 H) ppm; <sup>13</sup>C {<sup>1</sup>H} NMR (acetone-*d*<sub>6</sub>, 125.8 MHz): δ 145.9, 145.8, 143.3, 139.7, 128.7, 128.5, 126.1, 124.9, 121.5, 120.7, 118.4, 117.7, 64.2, 64.1 ppm; <sup>11</sup>B NMR (acetone, 128.4 MHz): δ 34.5 ppm; IR: ν = 3324, 1556, 1458, 1441, 1422, 1286, 1249, 1211, 1200, 1081, 1039, 939, 922, 901, 881, 827, 771 cm<sup>-1</sup>; HRMS (ESI) *m/z* calc. for C<sub>17</sub>H<sub>14</sub>BBrNO<sub>4</sub> [M + HCOO]<sup>-</sup> 386.0207, found 386.0199.

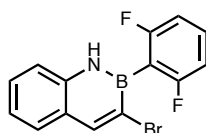

**3-Bromo-2-(2,6-difluorophenyl)-2,1-borazanaphthalene (1g):** obtained as an off white powder (241 mg, 60%, 1.25 mmol scale) from **10c**; mp = 173 °C; <sup>1</sup>H NMR (acetone-*d*<sub>6</sub>, 500.4 MHz): δ 10.37 (br s, 1 H), 8.59 (s, 1 H), 7.79 (d, *J* = 7.7 Hz, 1 H), 7.69 (d, *J* = 8.6 Hz, 1 H), 7.56 (ddd, *J* = 8.3, 7.3, 1.4 Hz, 1 H), 7.54–7.44 (m, 1 H), 7.31 (ddd, *J* = 8.1, 7.2, 1.0 Hz, 1 H), 7.08–7.00 (m, 2 H) ppm; <sup>13</sup>C {<sup>1</sup>H} NMR (acetone-*d*<sub>6</sub>, 125.8 MHz): δ 164.5 (dd, *J* = 242.5,

<sup>3</sup> Molander, G. A.; Wisniewski, S. R. *J. Org. Chem.* **2014**, *79*, 6663.

13.9 Hz), 146.1, 139.4, 131.7 (t,  $J = 10.0$  Hz), 129.0, 128.7, 125.3, 122.2, 118.6, 110.7 (dd,  $J = 22.1, 5.9$  Hz) ppm;  $^{19}\text{F}$  NMR (acetone- $d_6$ , 470.8 MHz):  $\delta -102.9$  ppm;  $^{11}\text{B}$  NMR (acetone, 128.4 MHz):  $\delta 33.1$  ppm; IR:  $\nu = 3339, 1616, 1596, 1557, 1450, 1427, 1345, 1221, 1210, 1156, 1018, 978, 910, 781, 764, 745$   $\text{cm}^{-1}$ ; HRMS (CI)  $m/z$  calc. for  $\text{C}_{14}\text{H}_9\text{BBrF}_2\text{N}$   $[\text{M}]^+$  318.9979, found 318.9991.

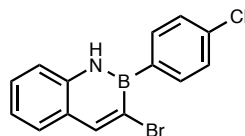

**3-Bromo-2-(4-chlorophenyl)-2,1-borazanaphthalene (1h)**: obtained as an off white powder (310 mg, 78%, 1.25 mmol scale) from **10d**; mp = 77 °C;  $^1\text{H}$  NMR (acetone- $d_6$ , 500.4 MHz):  $\delta$  9.88 (br s, 1 H), 8.48 (s, 1 H), 7.91 (d,  $J = 8.3$  Hz, 2 H), 7.67–7.64 (m, 2 H), 7.49 (ddd,  $J = 8.3, 7.1, 1.3$  Hz, 1 H), 7.44 (d,  $J = 8.3$  Hz, 2 H), 7.22 (ddd,  $J = 8.1, 7.1, 1.3$  Hz, 1 H) ppm;  $^{13}\text{C}$   $\{^1\text{H}\}$  NMR (acetone- $d_6$ , 125.8 MHz):  $\delta$  146.9, 140.0, 135.3, 134.8, 129.0, 128.5, 127.5, 125.0, 121.8, 118.6 ppm;  $^{11}\text{B}$  NMR (acetone, 128.4 MHz):  $\delta 33.6$  ppm; IR:  $\nu = 3369, 1614, 1589, 1554, 1421, 1388, 1340, 1227, 1201, 1087, 1006, 911, 845, 818, 756, 742$   $\text{cm}^{-1}$ ; HRMS (ESI)  $m/z$  calc. for  $\text{C}_{14}\text{H}_9\text{BBrClN}$   $[\text{M} - \text{H}]^-$  315.9700, found 315.9690.

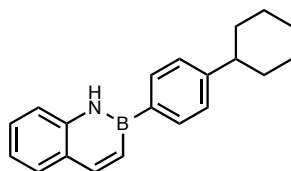

**2-(4-Cyclohexylphenyl)-2,1-borazanaphthalene (2a)**: obtained as a white powder (139 mg, 97%); mp = 145 °C;  $^1\text{H}$  NMR ( $\text{CDCl}_3$ , 500.4 MHz):  $\delta$  8.12 (d,  $J = 10.5$  Hz, 2 H), 7.87 (d,  $J = 8.4$  Hz, 2 H), 7.66 (d,  $J = 8.4$  Hz, 1 H), 7.44 (dd,  $J = 7.4, 7.4$  Hz, 1 H), 7.37–7.32 (m, 3 H), 7.30–7.26 (m, 1 H), 7.19 (ddd,  $J = 7.6, 7.4, 1.1$  Hz, 1 H), 2.62–2.53 (m, 1 H), 1.96–1.85 (m, 4 H), 1.78 (d,  $J = 6.0$  Hz, 1 H), 1.52–1.37 (m, 4 H), 1.34–1.27 (m, 1 H) ppm;  $^{13}\text{C}$   $\{^1\text{H}\}$  NMR (acetone- $d_6$ , 125.8 MHz):  $\delta$  149.3, 145.1, 141.1, 133.2, 129.1, 128.1, 126.4, 125.6, 120.5, 118.5, 44.5, 34.2, 26.6, 25.9 ppm;  $^{11}\text{B}$  NMR (acetone, 128.4 MHz):  $\delta 34.6$  ppm; IR:  $\nu = 2920, 2849, 1612, 1596, 1564, 1439, 1404, 1388, 1347, 1284, 1218, 1174, 978, 808, 755, 737$   $\text{cm}^{-1}$ ; HRMS (ESI)  $m/z$  calc. for  $\text{C}_{20}\text{H}_{23}\text{BN}$   $[\text{M} + \text{H}]^+$  288.1924, found 288.1924.

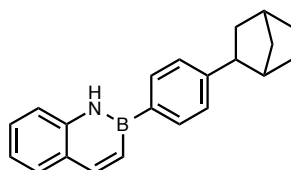

**2-(4-(*exo*-Bicyclo[2.2.1]heptan-2-yl)phenyl)-2,1-borazanaphthalene (2b)**: obtained as a white powder (143 mg, 96%); mp = 159 °C;  $^1\text{H}$  NMR (acetone- $d_6$ , 500.4 MHz):  $\delta$  9.67 (br s, 1 H), 8.15 (d,  $J = 12.5$  Hz, 1 H), 7.96 (d,  $J = 7.2$  Hz, 2 H), 7.69–7.63 (m, 2 H), 7.43 (dd,  $J = 7.2, 7.9$  Hz, 1 H), 7.33–7.24 (m, 3 H), 7.16 (dd,  $J = 6.6, 7.2$  Hz, 1 H), 2.82–2.76 (m, 1 H), 2.37–2.34 (m, 2 H), 1.82–1.75 (m, 1 H), 1.73–1.68 (m, 1 H), 1.64–1.54 (m, 3 H), 1.43–1.36 (m, 1 H), 1.31–1.28 (m, 1 H), 1.21–1.18 (m, 1 H) ppm;  $^{13}\text{C}$   $\{^1\text{H}\}$  NMR (acetone- $d_6$ , 125.8 MHz):  $\delta$  148.8, 145.1, 141.1, 133.1, 129.0, 128.1, 126.6, 125.6, 120.5, 118.4, 47.2, 42.9, 38.6, 36.6, 35.6, 30.2, 28.5 ppm;  $^{11}\text{B}$  NMR (acetone, 128.4 MHz):  $\delta 34.0$  ppm; IR:  $\nu = 2947, 2866, 1612, 1594, 1440, 1403, 1388, 1345, 1284, 1209, 1143, 978, 941, 806, 756, 697$   $\text{cm}^{-1}$ ; HRMS (ESI)  $m/z$  calc. for  $\text{C}_{21}\text{H}_{21}\text{BN}$   $[\text{M} - \text{H}]^-$  298.1767, found 298.1763.

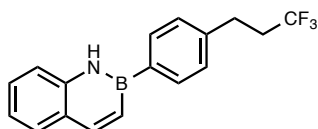

**2-(4-(3,3,3-Trifluoropropyl)phenyl)-2,1-borazanaphthalene (2c):** obtained as a white powder (138 mg, 92%) using silicate **11a**; mp = 151 °C;  $^1\text{H}$  NMR (acetone- $d_6$ , 500.4 MHz):  $\delta$  9.73 (br s, 1 H), 8.17 (d,  $J$  = 11.3 Hz, 1 H), 8.00 (d,  $J$  = 7.7 Hz, 2 H), 7.70–7.63 (m, 2 H), 7.44 (dd,  $J$  = 7.5, 7.6 Hz, 1 H), 7.39 (d,  $J$  = 8.4 Hz, 2 H), 7.30–7.25 (m, 1 H), 7.17 (dd,  $J$  = 7.4, 7.4 Hz, 1 H), 2.95–2.89 (m, 2 H), 2.62–2.50 (m, 2 H) ppm;  $^{13}\text{C}$  { $^1\text{H}$ } NMR (CDCl $_3$ , 125.8 MHz):  $\delta$  145.5, 140.5, 140.0, 133.1, 129.4, 128.3, 128.1, 126.7 (q,  $J$  = 276.3 Hz), 125.7, 121.0, 118.1, 35.5 (q,  $J$  = 28.7 Hz), 28.2 (q,  $J$  = 2.73 Hz) ppm;  $^{11}\text{B}$  NMR (acetone, 128.4 MHz):  $\delta$  33.9 ppm;  $^{19}\text{F}$  { $^1\text{H}$ } NMR (acetone- $d_6$ , 470.8 MHz): –67.0 ppm; IR:  $\nu$  = 1607, 1564, 1438, 1385, 1330, 1304, 1284, 1255, 1224, 1155, 1115, 1082, 975, 811, 760, 732  $\text{cm}^{-1}$ ; HRMS (ESI)  $m/z$  calc. for C $_{17}$ H $_{16}$ BNF $_3$  [M + H] $^+$  302.1328, found 302.1334.

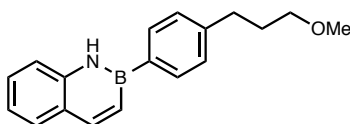

**2-(4-(3-Methoxypropyl)phenyl)-2,1-borazanaphthalene (2d):** obtained as an off white powder (133 mg, 96%); mp = 76 °C;  $^1\text{H}$  NMR (acetone- $d_6$ , 500.4 MHz):  $\delta$  9.69 (br s, 1 H), 8.15 (d,  $J$  = 11.7 Hz, 1 H), 7.97 (d,  $J$  = 7.4 Hz, 2 H), 7.69–7.64 (m, 2 H), 7.44 (dd,  $J$  = 7.0, 7.0 Hz, 1 H), 7.30–7.28 (m, 3 H), 7.17 (dd,  $J$  = 7.6, 7.5 Hz, 1 H), 3.36 (t,  $J$  = 5.8 Hz, 2 H), 3.28 (s, 3 H), 2.70 (t,  $J$  = 7.2 Hz, 2 H), 1.87 (dt,  $J$  = 7.2, 5.8 Hz, 2 H) ppm;  $^{13}\text{C}$  { $^1\text{H}$ } NMR (acetone- $d_6$ , 125.8 MHz):  $\delta$  145.2, 143.6, 141.1, 133.2, 129.1, 128.2, 128.1, 125.6, 120.6, 118.5, 71.4, 57.5, 32.0, 31.2 ppm;  $^{11}\text{B}$  NMR (acetone, 128.4 MHz):  $\delta$  34.3 ppm; IR:  $\nu$  = 1605, 1595, 1562, 1437, 1389, 1346, 1282, 1208, 1193, 1118, 1067, 977, 952, 942, 813, 801  $\text{cm}^{-1}$ ; HRMS (ESI)  $m/z$  calc. for C $_{18}$ H $_{20}$ BNO [M] $^+$  277.1638, found 277.1632.

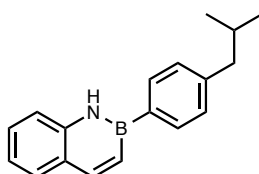

**2-(4-Isobutylphenyl)-2,1-borazanaphthalene (2e):** obtained as a white powder (122 mg, 94%); mp = 109 °C;  $^1\text{H}$  NMR (acetone- $d_6$ , 500.4 MHz):  $\delta$  9.67 (br s, 1 H), 8.15 (d,  $J$  = 11.5 Hz, 1 H), 7.96 (d,  $J$  = 7.9 Hz, 2 H), 7.69–7.63 (m, 2 H), 7.44 (ddd,  $J$  = 7.4, 7.4, 1.0 Hz, 1 H), 7.29 (dd,  $J$  = 11.9, 1.0 Hz, 1 H), 7.25 (d,  $J$  = 8.2 Hz, 2 H), 7.17 (dd,  $J$  = 7.2, 7.3 Hz, 1 H), 2.52 (d,  $J$  = 7.0 Hz, 2 H), 1.91 (sept,  $J$  = 6.7 Hz, 1 H), 0.92 (d,  $J$  = 6.6 Hz, 6 H) ppm;  $^{13}\text{C}$  { $^1\text{H}$ } NMR (acetone- $d_6$ , 125.8 MHz):  $\delta$  145.2, 142.9, 141.1, 133.0, 129.1, 128.7, 128.2, 125.6, 120.6, 118.5, 45.1, 30.0, 21.8 ppm;  $^{11}\text{B}$  NMR (acetone, 128.4 MHz):  $\delta$  34.2 ppm; IR:  $\nu$  = 2952, 2865, 1612, 1596, 1566, 1460, 1440, 1402, 1384, 1346, 1284, 1200, 1118, 978, 813, 791  $\text{cm}^{-1}$ ; HRMS (ESI)  $m/z$  calc. for C $_{18}$ H $_{21}$ BN [M + H] $^+$  262.1767, found 262.1769.



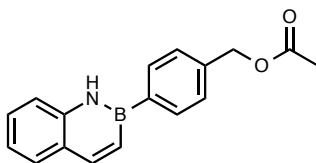

**2-(4-(Acetoxymethyl)phenyl)-2,1-borazanaphthalene (2f):** obtained as a white powder (104 mg, 75%) using silicate **11b**; mp = 95 °C; <sup>1</sup>H NMR (acetone-*d*<sub>6</sub>, 500.4 MHz): δ 9.79 (br s, 1 H), 8.18 (d, *J* = 11.6 Hz, 1 H), 8.05 (d, *J* = 8.0 Hz, 2 H), 7.70–7.64 (m, 2 H), 7.49–7.42 (m, 3 H), 7.29 (dd, *J* = 11.5, 2.1 Hz, 1 H), 7.18 (ddd, *J* = 7.9, 7.1, 1.1 Hz, 1 H), 5.15 (s, 2 H), 2.07 (s, 3 H) ppm; <sup>13</sup>C {<sup>1</sup>H} NMR (acetone-*d*<sub>6</sub>, 125.8 MHz): δ 170.0, 145.4, 141.0, 137.7, 133.2, 129.1, 128.3, 127.5, 125.6, 120.8, 118.6, 65.5, 19.9 ppm; <sup>11</sup>B NMR (acetone, 128.4 MHz): δ 34.0 ppm; IR: ν = 1738, 1609, 1595, 1563, 1437, 1377, 1361, 1226, 1152, 1117, 1039, 1018, 988, 977, 939, 806 cm<sup>-1</sup>; HRMS (ESI) *m/z* calc. for C<sub>17</sub>H<sub>16</sub>BNNaO<sub>2</sub> [M + Na]<sup>+</sup> 300.1172, found 300.1169.

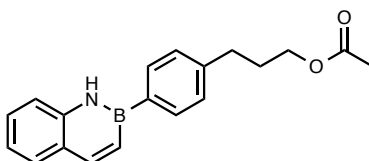

**2-(4-(3-Acetoxypropyl)phenyl)-2,1-borazanaphthalene (2g):** obtained as an off white powder (141 mg, 92%); mp = 71 °C; <sup>1</sup>H NMR (acetone-*d*<sub>6</sub>, 500.4 MHz): δ 9.70 (br s, 1 H), 8.15 (d, *J* = 8.6 Hz, 1 H), 7.98 (d, *J* = 7.8 Hz, 2 H), 7.69 (d, *J* = 8.1 Hz, 1 H), 7.66 (d, *J* = 8.1 Hz, 1 H), 7.45 (ddd, *J* = 8.1, 6.7, 1.3 Hz, 1 H), 7.31 (d, *J* = 7.8 Hz, 2 H), 7.28 (dd, *J* = 11.5, 1.8 Hz, 1 H), 7.17 (ddd, *J* = 8.0, 7.0, 1.3 Hz, 1 H), 4.07 (t, *J* = 6.6 Hz, 2 H), 2.74 (t, *J* = 7.7 Hz, 2 H), 2.00 (s, 3 H), 2.00–1.95 (m, 2 H) ppm; <sup>13</sup>C {<sup>1</sup>H} NMR (acetone-*d*<sub>6</sub>, 125.8 MHz): δ 170.1, 145.2, 142.9, 141.0, 133.2, 129.1, 128.2, 128.0, 125.6, 120.6, 118.5, 63.2, 31.8, 30.1, 19.9 ppm; <sup>11</sup>B NMR (acetone, 128.4 MHz): δ 34.7 ppm; IR: ν = 3354, 1717, 1610, 1562, 1444, 1403, 1388, 136, 1344, 1253, 1191, 1154, 1033, 1002, 979, 815 cm<sup>-1</sup>; HRMS (ESI) *m/z* calc. for C<sub>19</sub>H<sub>20</sub>BNNaO<sub>2</sub> [M + Na]<sup>+</sup> 328.1485, found 328.1481.

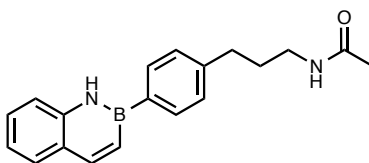

**2-(4-(3-Acetamidopropyl)phenyl)-2,1-borazanaphthalene (2h):** obtained as an off white powder (135 mg, 89%); mp = 157 °C; <sup>1</sup>H NMR (CDCl<sub>3</sub>, 500.4 MHz): δ 8.17 (br s, 1 H), 8.13 (d, *J* = 11.3 Hz, 1 H), 7.86 (d, *J* = 7.8 Hz, 2 H), 7.68 (d, *J* = 8.3 Hz, 1 H), 7.45 (ddd, *J* = 7.9, 7.2, 1.4 Hz, 1 H), 7.35 (d, *J* = 8.5 Hz, 1 H), 7.30 (d, *J* = 7.5 Hz, 2 H), 7.27 (dd, *J* = 11.6, 2.1 Hz, 1 H), 7.20 (ddd, *J* = 7.9, 7.0, 0.9 Hz, 1 H), 5.49 (br s, 1 H), 3.33 (td, *J* = 6.8, 6.5 Hz, 2 H), 2.72 (t, *J* = 7.7 Hz, 2 H), 1.96 (s, 3 H), 1.90 (tt, *J* = 7.7, 6.8 Hz, 2 H) ppm; <sup>13</sup>C {<sup>1</sup>H} NMR (CDCl<sub>3</sub>, 125.8 MHz): δ 170.0, 145.4, 143.0, 140.1, 133.0, 132.9, 129.4, 128.3, 125.6, 120.9, 118.1, 39.3, 33.3, 31.0, 23.3 ppm; <sup>11</sup>B NMR (acetone, 128.4 MHz): δ 34.1 ppm; IR: ν = 1633, 1606, 1595, 1551, 1435, 1404, 1366, 1344, 1301, 1281, 1200, 1182, 810, 757, 745, 719 cm<sup>-1</sup>; HRMS (ESI) *m/z* calc. for C<sub>19</sub>H<sub>22</sub>BNN<sub>2</sub>O [M + H]<sup>+</sup> 305.1825, found 305.1816.

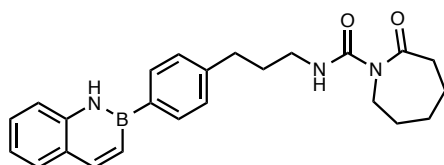

**2-(4-(3-(2-Oxoazepane-1-carboxamido)propyl)phenyl)-2,1-borazanaphthalene (2i):** obtained as an off white powder (192 mg, 96%); mp = 133 °C;  $^1\text{H}$  NMR (DMSO- $d_6$ , 500.4 MHz):  $\delta$  10.34 (br s, 1 H), 9.22 (br s, 1 H), 8.11 (d,  $J$  = 11.4 Hz, 1 H), 7.99 (d,  $J$  = 8.0 Hz, 2 H), 7.71 (d,  $J$  = 8.3 Hz, 1 H), 7.66 (d,  $J$  = 8.0 Hz, 1 H), 7.44 (t,  $J$  = 7.6 Hz, 1 H), 7.29 (d,  $J$  = 7.1 Hz, 2 H), 7.22 (d,  $J$  = 11.1 Hz, 1 H), 7.14 (t,  $J$  = 7.1 Hz, 1 H), 3.90 (d,  $J$  = 2.1 Hz, 2 H), 3.18–3.24 (m, 2 H), 2.71–2.68 (m, 2 H), 2.62 (t,  $J$  = 4.3 Hz, 2 H), 1.85–1.80 (m, 2 H), 1.68–1.62 (m, 4 H), 1.58–1.53 (m, 2 H) ppm;  $^{13}\text{C}$  { $^1\text{H}$ } NMR (DMSO- $d_6$ , 125.8 MHz):  $\delta$  179.4, 154.6, 145.5, 143.3, 141.4, 133.9, 129.4, 128.6, 128.3, 125.5, 120.9, 119.0, 43.2, 39.9, 39.3, 33.0, 30.9, 28.7, 28.3, 23.4 ppm;  $^{11}\text{B}$  NMR (acetone, 128.4 MHz):  $\delta$  33.9 ppm; IR:  $\nu$  = 3390, 3258, 1686, 1651, 1614, 1568, 1524, 1451, 1440, 1396, 1351, 1289, 1205, 1174, 1159, 814, 776, 748  $\text{cm}^{-1}$ ; HRMS (ESI)  $m/z$  calc. for  $\text{C}_{24}\text{H}_{29}\text{BN}_3\text{O}_2$  [ $\text{M} + \text{H}$ ] $^+$  402.2344, found 402.2353.

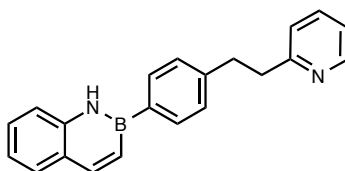

**2-(4-(2-Pyridin-2-yl)ethyl)phenyl)-2,1-borazanaphthalene (2j):** obtained as an off white powder (125 mg, 81%); mp = 117 °C;  $^1\text{H}$  NMR (acetone- $d_6$ , 500.4 MHz):  $\delta$  9.73 (br s, 1 H), 8.52 (d,  $J$  = 4.9 Hz, 1 H), 8.16 (d,  $J$  = 11.2 Hz, 1 H), 7.95 (d,  $J$  = 7.3 Hz, 2 H), 7.69–7.60 (m, 3 H), 7.44 (ddd,  $J$  = 7.9, 7.4, 1.4 Hz, 1 H), 7.32–7.26 (m, 3 H), 7.21 (d,  $J$  = 8.0 Hz, 1 H) 7.19–7.12 (m, 2 H), 3.13–3.08 (m, 4 H) ppm;  $^{13}\text{C}$  { $^1\text{H}$ } NMR (acetone- $d_6$ , 125.8 MHz):  $\delta$  161.1, 149.1, 145.2, 143.3, 141.1, 136.0, 133.2, 129.1, 128.2, 128.1, 125.6, 122.7, 121.0, 120.6, 118.5, 39.6, 35.5 ppm;  $^{11}\text{B}$  NMR (acetone, 128.4 MHz):  $\delta$  35.1 ppm; IR:  $\nu$  = 3372, 1605, 1593, 1565, 1471, 1431, 1404, 1386, 1347, 1282, 1229, 1199, 1139, 977, 808, 756, 745  $\text{cm}^{-1}$ ; HRMS (ESI)  $m/z$  calc. for  $\text{C}_{21}\text{H}_{20}\text{BN}_2$  [ $\text{M} + \text{H}$ ] $^+$  311.1720, found 311.1724.

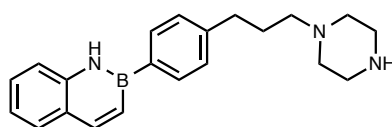

**2-(4-(3-(Piperazin-1-yl)propyl)phenyl)-2,1-borazanaphthalene (2k):** obtained as a colorless oil (78 mg, 47%) using silicate **11c**;  $^1\text{H}$  NMR (acetone- $d_6$ , 500.4 MHz):  $\delta$  8.16 (br s, 1 H), 8.13 (d,  $J$  = 11.5 Hz, 1 H), 7.66 (d,  $J$  = 7.7 Hz, 2 H), 7.66 (dd,  $J$  = 8.0, 1.1 Hz, 1 H), 7.44 (ddd,  $J$  = 8.3, 6.9, 1.2 Hz, 1 H), 7.35–7.30 (m, 3 H), 7.29 (d,  $J$  = 12 H, 1 H), 7.20 (t,  $J$  = 7.4 Hz, 1 H), 2.96–2.90 (m, 4 H), 2.71 (t,  $J$  = 7.7 Hz, 2 H), 2.51–2.37 (m, 6 H), 2.32–2.20 (br s, 1 H), 1.89 (tt,  $J$  = 8.5, 6.7 Hz, 2 H) ppm;  $^{13}\text{C}$  { $^1\text{H}$ } NMR (acetone- $d_6$ , 125.8 MHz):  $\delta$  145.3, 143.9, 140.2, 132.8, 129.4, 128.4, 128.3, 125.6, 120.9, 118.1, 58.6, 54.5, 46.0, 33.7, 28.2 ppm;  $^{11}\text{B}$  NMR (acetone, 128.4 MHz):  $\delta$  34.2 ppm; IR:  $\nu$  = 2939, 2806, 1612, 1595, 1563, 1437, 1345, 1283, 1233, 1217, 1199, 1188, 1142, 1116, 979, 801  $\text{cm}^{-1}$ ; HRMS (ESI)  $m/z$  calc. for  $\text{C}_{21}\text{H}_{27}\text{BN}_3$  [ $\text{M} + \text{H}$ ] $^+$  332.2298, found 332.2307.

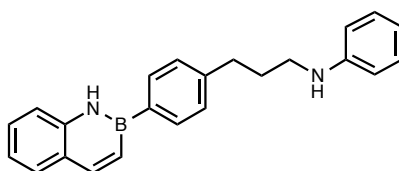

**2-(4-(3-(Phenylamino)propyl)phenyl)-2,1-borazanaphthalene (2l):** obtained as a white powder (154 mg, 91%); mp = 110 °C;  $^1\text{H}$  NMR (acetone- $d_6$ , 500.4 MHz):  $\delta$  9.69 (br s, 1 H), 8.16 (d,  $J$  = 11.0 Hz, 1 H), 7.98 (d,  $J$  = 7.8 Hz, 2 H), 7.67 (t,  $J$  = 8.6 Hz, 2 H), 7.44 (ddd,  $J$  = 8.2, 7.2, 1.5 Hz, 1 H), 7.34–7.26 (m, 3 H), 7.17 (ddd,  $J$  = 8.0, 6.8, 1.2 Hz, 1 H), 7.10–7.05 (m, 2 H), 6.61 (dd,  $J$  = 8.2, 1.1 Hz, 2 H), 6.56 (t,  $J$  = 7.3 Hz, 1 H), 4.85 (br s, 1 H), 3.18–3.12 (m, 2 H), 2.78 (t,  $J$  = 7.7 Hz, 2 H), 2.00–1.94 (m, 2 H) ppm;  $^{13}\text{C}$   $\{^1\text{H}\}$  NMR (acetone- $d_6$ , 125.8 MHz):  $\delta$  149.1, 145.2, 143.6, 141.1, 133.2, 129.1, 128.8, 128.2, 128.1, 125.6, 120.6, 118.5, 115.9, 112.2, 42.8, 33.2, 30.9 ppm;  $^{11}\text{B}$  NMR (acetone, 128.4 MHz):  $\delta$  34.4 ppm; IR:  $\nu$  = 3350, 1596, 1561, 1503, 1480, 1438, 1405, 1311, 1282, 1236, 1183, 1163, 1148, 1118, 810, 757, 743  $\text{cm}^{-1}$ ; HRMS (ESI)  $m/z$  calc. for  $\text{C}_{23}\text{H}_{24}\text{BN}_2$   $[\text{M} + \text{H}]^+$  339.2033, found 339.2032.

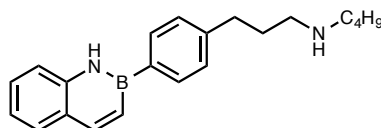

**2-(4-(3-(Butylamino)propyl)phenyl)-2,1-borazanaphthalene (2m):** obtained as a light brown powder (152 mg, 95%) using silicate **11d**; mp = 91 °C;  $^1\text{H}$  NMR ( $\text{CDCl}_3$ , 500.4 MHz):  $\delta$  8.18–8.12 (m, 2 H), 7.88 (d,  $J$  = 7.8 Hz, 2 H), 7.67 (d,  $J$  = 7.8 Hz, 1 H), 7.46 (ddd,  $J$  = 8.6, 6.4, 1.4 Hz, 1 H), 7.36–7.27 (m, 4 H), 7.21 (ddd,  $J$  = 8.1, 7.5, 1.3 Hz, 1 H), 2.77–2.69 (m, 4 H), 2.64 (t,  $J$  = 7.2 Hz, 2 H), 2.19 (br s, 1 H), 1.90 (tt,  $J$  = 7.8, 7.2 Hz, 2 H), 1.51 (tt,  $J$  = 8.0, 7.2 Hz, 2 H), 1.40–1.33 (m, 2 H), 0.95 (t,  $J$  = 7.5 Hz, 3 H) ppm;  $^{13}\text{C}$   $\{^1\text{H}\}$  NMR ( $\text{CDCl}_3$ , 125.8 MHz):  $\delta$  145.3, 143.8, 140.2, 132.8, 129.4, 128.3, 128.2, 125.6, 120.9, 118.1, 49.7, 49.5, 33.7, 32.2, 31.5, 20.4, 13.9 ppm;  $^{11}\text{B}$  NMR (acetone, 128.4 MHz):  $\delta$  34.6 ppm; IR:  $\nu$  = 2988, 1608, 1597, 1563, 1437, 1405, 1345, 1282, 1234, 1211, 1183, 1103, 977, 881, 796, 758, 733  $\text{cm}^{-1}$ ; HRMS (ESI)  $m/z$  calc. for  $\text{C}_{21}\text{H}_{28}\text{BN}_2$   $[\text{M} + \text{H}]^+$  319.2346, found 319.2351.

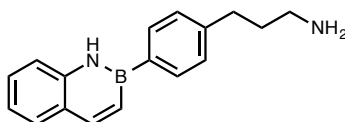

**2-(4-(3-Aminopropyl)phenyl)-2,1-borazanaphthalene (2n):** obtained as a white powder (89 mg, 68%); mp = 121 °C;  $^1\text{H}$  NMR (acetone- $d_6$ , 500.4 MHz):  $\delta$  9.71 (br s, 1 H), 8.15 (d,  $J$  = 11.6 Hz, 1 H), 7.96 (d,  $J$  = 7.9 Hz, 2 H), 7.69–7.65 (m, 2 H), 7.43 (ddd,  $J$  = 8.5, 6.8, 1.4 Hz, 1 H), 7.31–7.26 (m, 3 H), 7.16 (ddd,  $J$  = 8.1, 6.8, 1.4 Hz, 1 H), 3.21 (t,  $J$  = 6.8 Hz, 2 H), 2.72 (t,  $J$  = 7.1 Hz, 2 H), 1.95–1.71 (m, 4 H) ppm;  $^{13}\text{C}$   $\{^1\text{H}\}$  NMR (acetone- $d_6$ , 125.8 MHz):  $\delta$  145.1, 144.1, 141.1, 133.1, 129.1, 128.2, 128.1, 125.6, 120.5, 118.5, 50.2, 33.4, 32.5 ppm;  $^{11}\text{B}$  NMR (acetone, 128.4 MHz):  $\delta$  34.2 ppm; IR:  $\nu$  = 2941, 1651, 1609, 1575, 1455, 1417, 1349, 1287, 1208, 1193, 978, 941, 893, 813, 790, 759  $\text{cm}^{-1}$ ; HRMS (ESI)  $m/z$  calc. for  $\text{C}_{17}\text{H}_{20}\text{BN}_2$   $[\text{M} + \text{H}]^+$  263.1720, found 263.1711.

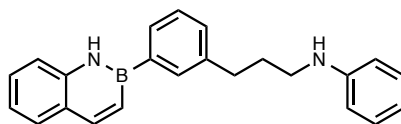

**2-(3-(3-(Phenylamino)propyl)phenyl)-2,1-borazanaphthalene (3a):** obtained as a white powder (153 mg, 90%); mp = 75 °C;  $^1\text{H}$  NMR ( $\text{CDCl}_3$ , 500.4 MHz):  $\delta$  8.18 (d,  $J$  = 11.3 Hz, 1 H), 8.14 (br s, 1 H), 7.81 (dt,  $J$  = 7.2, 1.2 Hz, 1 H), 7.78 (s, 1 H), 7.70 (dd,  $J$  = 7.9, 1.3 Hz, 1 H), 7.51–7.44 (m, 2 H), 7.38–7.30 (m, 3 H), 7.27–7.20 (m, 3 H), 6.75 (tt,  $J$  = 7.2, 1.0 Hz, 1 H), 6.65 (dd,  $J$  = 8.4, 0.8 Hz, 2 H), 3.67 (s, 1 H), 3.24 (t,  $J$  = 7.1 Hz, 2 H), 2.87 (t,  $J$  = 7.6 Hz, 2 H), 2.06 (tt,  $J$  = 7.6, 7.1 Hz, 2 H) ppm;  $^{13}\text{C}$   $\{^1\text{H}\}$  NMR ( $\text{CDCl}_3$ , 125.8 MHz):  $\delta$  148.3, 145.5, 141.3, 140.1, 132.8, 130.4, 129.7, 129.4, 129.2, 128.3 [ $\times$  2], 125.7, 121.0, 118.2, 117.2, 112.7, 43.4, 33.5, 31.2 ppm;  $^{11}\text{B}$  NMR (acetone, 128.4 MHz):  $\delta$  34.5 ppm; IR:  $\nu$  = 3325, 1599, 1579, 1561, 1507, 135, 1389, 1346, 1334, 1283, 1262, 1245, 1210, 1184, 1153, 795, 762  $\text{cm}^{-1}$ ; HRMS (ESI)  $m/z$  calc. for  $\text{C}_{23}\text{H}_{24}\text{BN}_2$  [ $\text{M} + \text{H}$ ] $^+$  339.2033, found 339.2036.

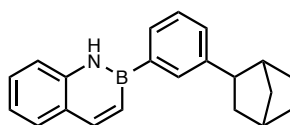

**2-(3-(*exo*-Bicyclo[2.2.1]heptan-2-yl)phenyl)-2,1-borazanaphthalene (3b):** obtained as a light brown powder (143 mg, 96%); mp = 115 °C;  $^1\text{H}$  NMR ( $\text{CDCl}_3$ , 500.4 MHz):  $\delta$  8.13 (d,  $J$  = 11.7 Hz, 2 H), 7.75 (s, 1 H), 7.70 (d,  $J$  = 7.5 Hz, 1 H), 7.65 (d,  $J$  = 7.7 Hz, 1 H), 7.43 (ddd,  $J$  = 8.6, 7.2, 1.4 Hz, 1 H), 7.39 (t,  $J$  = 7.4 Hz, 1 H), 7.35–7.30 (m, 2 H), 7.27 (dd,  $J$  = 11.6, 2.2 Hz, 1 H), 7.18 (ddd,  $J$  = 7.9, 7.0, 1.1 Hz, 1 H), 2.84 (dd,  $J$  = 8.3, 5.8 Hz, 1 H), 2.45–2.43 (m, 1 H), 2.41–2.37 (m, 1 H), 1.86–1.80 (m, 1 H), 1.79–1.73 (m, 1 H), 1.67–1.55 (m, 3 H), 1.44–1.38 (m, 1 H), 1.34–1.28 (m, 1 H), 1.26–1.20 (m, 1 H) ppm;  $^{13}\text{C}$   $\{^1\text{H}\}$  NMR ( $\text{CDCl}_3$ , 125.8 MHz):  $\delta$  147.2, 145.4, 140.2, 131.8, 129.8, 129.5, 128.4, 128.3, 128.2, 125.8, 121.0, 118.3, 47.6, 43.1, 39.2, 36.9, 36.2, 30.7, 29.0 ppm;  $^{11}\text{B}$  NMR (acetone, 128.4 MHz):  $\delta$  34.5 ppm; IR:  $\nu$  = 2948, 2866, 1613, 1595, 1561, 1435, 1349, 1288, 1267, 1244, 1210, 1188, 1119, 818, 791, 756  $\text{cm}^{-1}$ ; HRMS (ESI)  $m/z$  calc. for  $\text{C}_{21}\text{H}_{21}\text{BN}$  [ $\text{M} - \text{H}$ ] $^-$  298.1767, found 298.1756.

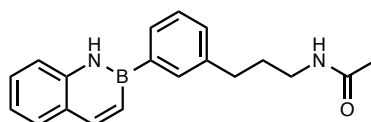

**2-(3-(3-Acetamidopropyl)phenyl)-2,1-borazanaphthalene (3c):** obtained as an off white powder (146 mg, 96%); mp = 78 °C;  $^1\text{H}$  NMR ( $\text{CDCl}_3$ , 500.4 MHz):  $\delta$  8.49 (br s, 1 H), 8.11 (d,  $J$  = 11.4 Hz, 1 H), 7.76–7.71 (m, 2 H), 7.63 (d,  $J$  = 8.0 Hz, 1 H), 7.44–7.41 (m, 2 H), 7.37 (t,  $J$  = 7.5 Hz, 1 H), 7.26–7.21 (m, 2 H), 7.19–7.15 (m, 1 H), 5.65 (br s, 1 H), 3.30 (td,  $J$  = 6.6, 6.7 Hz, 2 H), 2.70 (t,  $J$  = 7.4 Hz, 2 H), 1.94 (s, 3 H), 1.87 (tt,  $J$  = 7.7, 7.1 Hz, 2 H) ppm;  $^{13}\text{C}$   $\{^1\text{H}\}$  NMR ( $\text{CDCl}_3$ , 125.8 MHz):  $\delta$  170.2, 145.4, 140.8, 140.4, 132.8, 130.6, 129.6, 129.3, 128.3, 128.2, 125.6, 120.9, 118.4, 39.3, 33.1, 31.0, 23.3 ppm;  $^{11}\text{B}$  NMR (acetone, 128.4 MHz):  $\delta$  34.7 ppm; IR:  $\nu$  = 3321, 1649, 1613, 1595, 1562, 1436, 1412, 1386, 1366, 1347, 1285, 1242, 1207, 1181, 810, 785, 759  $\text{cm}^{-1}$ ; HRMS (ESI)  $m/z$  calc. for  $\text{C}_{19}\text{H}_{21}\text{BN}_2\text{NaO}$  [ $\text{M} + \text{Na}$ ] $^+$  327.1645, found 327.1635.

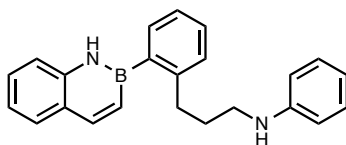

**2-(2-(3-(Phenylamino)propyl)phenyl)-2,1-borazanaphthalene (4a):** obtained as a light yellow oil (158 mg, 93%);  $^1\text{H}$  NMR ( $\text{CDCl}_3$ , 500.4 MHz):  $\delta$  8.08 (d,  $J = 11.7$  Hz, 1 H), 7.92 (br s, 1 H), 7.66 (d,  $J = 8.3$  Hz, 1 H), 7.48–7.44 (m, 1 H), 7.40 (ddd,  $J = 8.2, 7.1, 1.5$  Hz, 1 H), 7.37–7.32 (m, 1 H), 7.28–7.23 (m, 2 H), 7.19 (ddd,  $J = 7.9, 7.0, 1.1$  Hz, 1 H), 7.15 (d,  $J = 8.3$  Hz, 1 H), 7.09–7.02 (m, 3 H), 6.64 (tt,  $J = 7.3, 1.1$  Hz, 1 H), 6.38 (dd,  $J = 8.6, 1.1$  Hz, 2 H), 3.37 (br s, 1 H), 3.03 (t,  $J = 6.8$  Hz, 2 H), 2.90 (t,  $J = 7.6$  Hz, 2 H), 1.85 (tt,  $J = 7.6, 6.8$  Hz, 2 H) ppm;  $^{13}\text{C}$   $\{^1\text{H}\}$  NMR ( $\text{CDCl}_3$ , 125.8 MHz):  $\delta$  148.2, 144.9, 140.0, 133.0, 129.4, 129.1, 128.7, 128.6, 128.4 [ $\times 2$ ], 125.5, 125.3, 121.2, 118.3, 117.2, 112.7, 43.4, 33.6, 31.9 ppm;  $^{11}\text{B}$  NMR (acetone, 128.4 MHz):  $\delta$  36.1 ppm; IR:  $\nu = 3331, 1614, 1597, 1559, 1504, 1430, 1345, 1320, 1280, 1262, 1235, 1203, 1179, 978, 907, 811, 746$   $\text{cm}^{-1}$ ; HRMS (ESI)  $m/z$  calc. for  $\text{C}_{23}\text{H}_{24}\text{BN}_2$  [ $\text{M} + \text{H}$ ] $^+$  339.2033, found 339.2034.

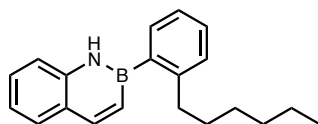

**2-(2-Hexylphenyl)-2,1-borazanaphthalene (4b):** obtained as a colorless oil (140 mg, 97%);  $^1\text{H}$  NMR ( $\text{CDCl}_3$ , 500.4 MHz):  $\delta$  8.09 (d,  $J = 11.4$  Hz, 1 H), 7.93 (br s, 1 H), 7.67 (d,  $J = 8.3$  Hz, 1 H), 7.47 (dd,  $J = 7.3, 1.3$  Hz, 1 H), 7.43 (ddd,  $J = 8.4, 6.8, 1.2$  Hz, 1 H), 7.33 (ddd,  $J = 7.6, 7.4, 1.3$  Hz, 1 H), 7.29–7.16 (m, 4 H), 7.07 (dd,  $J = 11.4, 2.1$  Hz, 1 H), 2.77 (t,  $J = 8.3$  Hz, 2 H), 1.60–1.51 (m, 2 H), 1.31–1.17 (m, 6 H), 0.8 (t,  $J = 6.8$  Hz, 3 H) ppm;  $^{13}\text{C}$   $\{^1\text{H}\}$  NMR ( $\text{CDCl}_3$ , 125.8 MHz):  $\delta$  146.3, 144.7, 140.1, 133.0, 129.5, 128.7, 128.5, 128.3, 125.4, 125.3, 121.1, 118.2, 36.2, 32.7, 31.7, 29.3, 22.6, 14.1 ppm;  $^{11}\text{B}$  NMR (acetone, 128.4 MHz):  $\delta$  36.3 ppm; IR:  $\nu = 2952, 2924, 2854, 1614, 1596, 1559, 1430, 1383, 1345, 1278, 1232, 1213, 1203, 1114, 978, 809$   $\text{cm}^{-1}$ ; HRMS (ESI)  $m/z$  calc. for  $\text{C}_{20}\text{H}_{23}\text{BN}$  [ $\text{M} - \text{H}$ ] $^-$  288.1924, found 288.1942.

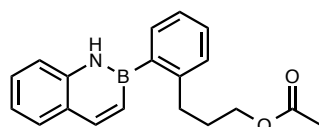

**2-(2-(3-Acetoxypropyl)phenyl)-2,1-borazanaphthalene (4c):** obtained as a colorless oil (142 mg, 93%);  $^1\text{H}$  NMR ( $\text{CDCl}_3$ , 500.4 MHz):  $\delta$  8.10 (d,  $J = 11.2$  Hz, 1 H), 7.80 (br s, 1 H), 7.68 (d,  $J = 8.0$  Hz, 1 H), 7.50–7.41 (m, 2 H), 7.37–7.30 (m, 2 H), 7.28–7.24 (m, 2 H), 7.22 (ddd,  $J = 8.0, 7.0, 1.2$  Hz, 1 H), 7.06 (dd,  $J = 11.6, 1.8$  Hz, 1 H), 3.99 (t,  $J = 6.6$  Hz, 2 H), 2.87 (t,  $J = 7.8$  Hz, 2 H), 1.91–1.85 (m, 2 H), 1.84 (s, 3 H) ppm;  $^{13}\text{C}$   $\{^1\text{H}\}$  NMR ( $\text{CDCl}_3$ , 125.8 MHz):  $\delta$  171.1, 144.8, 144.4, 140.2, 133.0, 129.4, 128.6, 128.5, 128.4, 125.6, 125.3, 121.2, 118.3, 63.8, 32.3, 31.2, 20.7 ppm;  $^{11}\text{B}$  NMR (acetone, 128.4 MHz):  $\delta$  36.1 ppm; IR:  $\nu = 1723, 1614, 1596, 1560, 1432, 1286, 1365, 1347, 1236, 1031, 979, 908, 812, 753, 729, 662$   $\text{cm}^{-1}$ ; HRMS (ESI)  $m/z$  calc. for  $\text{C}_{19}\text{H}_{21}\text{BNO}_2$  [ $\text{M} + \text{H}$ ] $^+$  306.1665, found 306.1666.

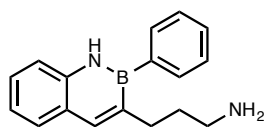

**3-(3-Aminopropyl)-2-phenyl-2,1-borazanaphthalene (5a):** obtained as a brown oil (124 mg, 95%);  $^1\text{H}$  NMR ( $\text{CDCl}_3$ , 500.4 MHz):  $\delta$  7.95 (br s, 1 H), 7.86 (s, 1 H), 7.70–7.65 (m, 2 H), 7.63 (dd,  $J = 7.8, 0.9$  Hz, 1 H), 7.48–7.37 (m, 4 H), 7.27 (d,  $J = 7.4$  Hz, 1 H), 7.20 (t,  $J = 7.5$  Hz, 1 H), 2.78 (t,  $J = 7.6$  Hz, 2 H), 2.68 (t,  $J = 7.6$  Hz, 2 H), 1.72 (br s, 2 H), 1.66 (tt,  $J = 7.6$  Hz, 2 H) ppm;  $^{13}\text{C}$   $\{^1\text{H}\}$  NMR ( $\text{CDCl}_3$ , 125.8 MHz):  $\delta$  141.9, 139.0, 132.3, 128.7, 128.4, 127.9, 127.4, 125.3, 121.1, 117.6, 41.8, 34.9, 32.4 ppm;  $^{11}\text{B}$  NMR (acetone, 128.4 MHz):  $\delta$  36.1 ppm; IR:  $\nu = 2926, 2854, 1661, 1614, 1597, 1567, 1453, 1427, 1372, 1347, 1285, 1240, 1208, 945, 909, 751$   $\text{cm}^{-1}$ ; HRMS (ESI)  $m/z$  calc. for  $\text{C}_{17}\text{H}_{20}\text{BN}_2$   $[\text{M} + \text{H}]^+$  263.1720, found 263.1724.

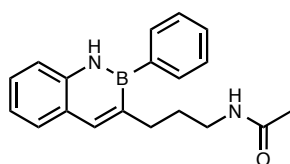

**3-(3-Acetamidopropyl)-2-phenyl-2,1-borazanaphthalene (5b):** obtained as an off white solid (146 mg, 96%); mp = 92  $^\circ\text{C}$ ;  $^1\text{H}$  NMR ( $\text{CDCl}_3$ , 500.4 MHz):  $\delta$  7.99 (br s, 1 H), 7.83 (s, 1 H), 7.65 (dd,  $J = 7.6, 1.4$  Hz, 2 H), 7.60 (d,  $J = 7.7$  Hz, 1 H), 7.46–7.40 (m, 3 H), 7.37 (ddd,  $J = 8.3, 6.8, 1.4$  Hz, 1 H), 7.26 (d,  $J = 7.8$  Hz, 1 H), 7.17 (ddd,  $J = 7.9, 7.3, 1.1$  Hz, 1 H), 5.26 (br s, 1 H), 3.13 (td,  $J = 6.4, 6.3$  Hz, 2 H), 2.73 (t,  $J = 7.6$  Hz, 2 H), 1.80 (s, 3 H), 1.63 (tt,  $J = 7.4, 7.2$  Hz, 2 H) ppm;  $^{13}\text{C}$   $\{^1\text{H}\}$  NMR ( $\text{CDCl}_3$ , 125.8 MHz):  $\delta$  169.9, 142.5, 139.1, 132.3, 128.8, 128.4, 128.0, 127.6, 125.3, 121.1, 117.7, 39.0, 32.1, 31.1, 23.2 ppm;  $^{11}\text{B}$  NMR (acetone, 128.4 MHz):  $\delta$  35.8 ppm; IR:  $\nu = 3281, 1650, 1614, 1597, 1565, 1453, 1429, 1365, 1347, 1286, 1239, 1208, 948, 752, 731, 701$   $\text{cm}^{-1}$ ; HRMS (ESI)  $m/z$  calc. for  $\text{C}_{19}\text{H}_{22}\text{BN}_2\text{O}$   $[\text{M} + \text{H}]^+$  305.1825, found 305.1830.

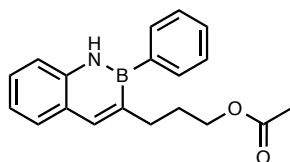

**3-(3-Acetoxypropyl)-2-phenyl-2,1-borazanaphthalene (5c):** obtained as a thick white wax (139 mg, 91%);  $^1\text{H}$  NMR ( $\text{CDCl}_3$ , 500.4 MHz):  $\delta$  7.93 (br s, 1 H), 7.85 (s, 1 H), 7.67 (dd,  $J = 7.8, 1.6$  Hz, 2 H), 7.62 (d,  $J = 7.7$  Hz, 1 H), 7.46–7.41 (m, 3 H), 7.39 (ddd,  $J = 8.2, 7.2, 1.4$  Hz, 1 H), 7.26 (d,  $J = 8.2$  Hz, 1 H), 7.19 (ddd,  $J = 7.8, 7.1, 1.0$  Hz, 1 H), 4.02 (t,  $J = 6.6$  Hz, 2 H), 2.80 (t,  $J = 7.9$  Hz, 2 H), 1.98 (s, 3 H), 1.81 (tt,  $J = 7.8, 6.4$  Hz, 2 H) ppm;  $^{13}\text{C}$   $\{^1\text{H}\}$  NMR ( $\text{CDCl}_3$ , 125.8 MHz):  $\delta$  171.1, 142.3, 139.1, 132.3, 128.8, 128.4, 128.0, 127.6, 125.3, 121.2, 117.7, 64.1, 31.4, 29.9, 20.9 ppm;  $^{11}\text{B}$  NMR (acetone, 128.4 MHz):  $\delta$  36.2 ppm; IR:  $\nu = 1721, 1614, 1597, 1567, 1452, 1427, 1385, 1364, 1347, 1238, 1035, 999, 946, 918, 854, 751$   $\text{cm}^{-1}$ ; HRMS (ESI)  $m/z$  calc. for  $\text{C}_{19}\text{H}_{20}\text{BNNaO}_2$   $[\text{M} + \text{Na}]^+$  328.1485, found 328.1496.

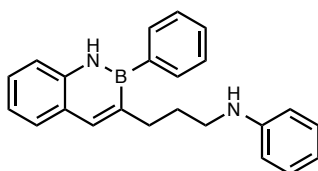

**3-(3-(Phenylamino)propyl)-2-phenyl-2,1-borazanaphthalene (5d):** obtained as a brown oil (147 mg, 87%);  $^1\text{H}$  NMR ( $\text{CDCl}_3$ , 500.4 MHz):  $\delta$  8.00 (br s, 1 H), 7.96 (s, 1 H), 7.79–7.75 (m, 2 H), 7.72 (d,  $J = 8.0$  Hz, 1 H), 7.58–7.54 (m, 3 H), 7.48 (t,  $J = 7.4$  Hz, 1 H), 7.33–7.21 (m, 4 H), 6.78 (t,  $J = 7.2$  Hz, 1 H), 6.59 (d,  $J = 8.1$  Hz, 2 H), 3.51 (br s, 1 H), 3.15 (t,  $J = 7.0$  Hz, 2 H), 2.94 (t,  $J = 7.5$  Hz, 2 H), 1.87 (tt,  $J = 7.5, 7.0$  Hz, 2 H) ppm;  $^{13}\text{C}$   $\{^1\text{H}\}$  NMR ( $\text{CDCl}_3$ , 125.8 MHz):  $\delta$  148.4, 142.3, 139.2, 132.4, 129.2, 128.9, 128.6, 128.1, 127.6, 125.4, 121.3, 117.8, 117.0, 112.7, 43.5, 32.7, 31.0 ppm;  $^{11}\text{B}$  NMR (acetone, 128.4 MHz):  $\delta$  35.9 ppm; IR:  $\nu = 1613, 1600, 1565, 1504, 1473, 1451, 1423, 1345, 1320, 1282, 1255, 1240, 1206, 1179, 944, 765$   $\text{cm}^{-1}$ ; HRMS (ESI)  $m/z$  calc. for  $\text{C}_{23}\text{H}_{24}\text{BN}_2$   $[\text{M} + \text{H}]^+$  339.2031, found 339.2033.

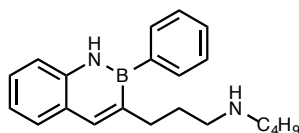

**3-(3-(Butylamino)propyl)-2-phenyl-2,1-borazanaphthalene (5e):** obtained as a light brown powder (141 mg, 89%);  $^1\text{H}$  NMR ( $\text{CDCl}_3$ , 500.4 MHz):  $\delta$  7.98 (br s, 1 H), 7.88 (s, 1 H), 7.70 (dd,  $J = 7.8, 1.5$  Hz, 2 H), 7.65 (d,  $J = 8.2$  Hz, 1 H), 7.49–7.43 (m, 3 H), 7.40 (ddd, 8.1, 7.4, 1.7 Hz, 1 H), 7.27 (d,  $J = 8.3$  Hz, 1 H), 7.21 (ddd,  $J = 7.8, 7.2, 1.0$  Hz, 1 H), 2.79 (t,  $J = 8.1$  Hz, 2 H), 2.62 (t,  $J = 7.3$  Hz, 2 H), 2.54 (t,  $J = 7.5$  Hz, 2 H), 1.98 (br s, 1 H), 1.73 (tt,  $J = 7.5, 7.3$  Hz, 2 H), 1.48–1.40 (m, 2 H), 1.37–1.27 (m, 2 H), 0.92 (t,  $J = 7.5$  Hz, 3 H) ppm;  $^{13}\text{C}$   $\{^1\text{H}\}$  NMR ( $\text{CDCl}_3$ , 125.8 MHz):  $\delta$  142.0, 139.1, 132.3, 128.7, 128.4, 127.9, 127.4, 125.4, 121.1, 117.6, 49.6, 49.4, 32.8, 32.0, 31.3, 20.4, 14.0 ppm;  $^{11}\text{B}$  NMR (acetone, 128.4 MHz):  $\delta$  35.0 ppm; IR:  $\nu = 2954, 2927, 2857, 1615, 1597, 1567, 1454, 1423, 1346, 1283, 1240, 1207, 954, 943, 910, 764$   $\text{cm}^{-1}$ ; HRMS (ESI)  $m/z$  calc. for  $\text{C}_{21}\text{H}_{28}\text{BN}_2$   $[\text{M} + \text{H}]^+$  319.2346, found 319.2333.

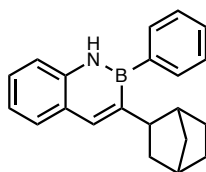

**3-(*exo*-Bicyclo[2.2.1]heptan-2-yl)-2-phenyl-2,1-borazanaphthalene (5f):** obtained as an off white solid (144 mg, 96%); mp = 62  $^\circ\text{C}$ ;  $^1\text{H}$  NMR ( $\text{CDCl}_3$ , 500.4 MHz):  $\delta$  7.84 (br s, 1 H), 7.81 (s, 1 H), 7.68–7.61 (m, 3 H), 7.46–7.38 (m, 3 H), 7.34 (ddd,  $J = 8.2, 6.9, 1.5$  Hz, 1 H), 7.22–7.19 (m, 1 H), 7.17 (ddd,  $J = 8.1, 6.9, 1.1$  Hz, 1 H), 2.98 (dd,  $J = 8.9, 6.0$  Hz, 1 H), 2.35–2.33 (m, 1 H), 2.32–2.30 (m, 1 H), 1.66–1.44 (m, 5 H), 1.30–1.23 (m, 1 H), 1.21–1.11 (m, 2 H) ppm;  $^{13}\text{C}$   $\{^1\text{H}\}$  NMR ( $\text{CDCl}_3$ , 125.8 MHz):  $\delta$  138.6, 137.4, 132.4, 1291, 128.1, 127.8, 127.2, 125.4, 121.1, 117.5, 44.9, 42.4, 38.7, 37.2, 35.5, 30.2, 29.0 ppm;  $^{11}\text{B}$  NMR (acetone, 128.4 MHz):  $\delta$  36.6 ppm; IR:  $\nu = 2946, 2866, 1612, 1597, 1563, 1453, 1419, 1345, 1307, 1235, 1206, 940, 909, 763, 747, 700$   $\text{cm}^{-1}$ ; HRMS (ESI)  $m/z$  calc. for  $\text{C}_{21}\text{H}_{23}\text{BN}$   $[\text{M} + \text{H}]^+$  300.1924, found 300.1928.

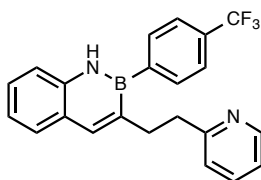

**3-(2-Pyridin-2-yl)ethyl-2-(4-trifluoromethylphenyl)-2,1-borazanaphthalene (6):** obtained as a white solid (145 mg, 77%); mp = 100 °C;  $^1\text{H}$  NMR (acetone- $d_6$ , 500.4 MHz):  $\delta$  9.71 (br s, 1 H), 8.44 (d,  $J$  = 4.2 Hz, 1 H), 8.01–7.87 (m, 3 H), 7.71 (d,  $J$  = 8.6 Hz, 2 H), 7.67 (d,  $J$  = 7.7 Hz, 1 H), 7.61 (d,  $J$  = 7.8 Hz, 1 H), 7.57 (ddd,  $J$  = 7.8, 7.7, 1.8 Hz, 1 H), 7.40 (ddd,  $J$  = 7.9, 7.5, 1.7 Hz, 1 H), 7.18 (t,  $J$  = 7.9 Hz, 1 H), 7.09–7.00 (m, 2 H), 3.13 (d,  $J$  = 8.6 Hz, 2 H), 2.93 (dd,  $J$  = 9.6, 7.3 Hz, 2 H) ppm;  $^{13}\text{C}$   $\{^1\text{H}\}$  NMR (acetone- $d_6$ , 125.8 MHz):  $\delta$  161.5, 149.0, 142.5, 139.8, 135.9, 133.2, 129.4 (q,  $J$  = 32.4 Hz), 128.7, 127.6, 125.5, 124.7 (q,  $J$  = 271.8 Hz), 124.0 (q,  $J$  = 4.0 Hz), 122.5, 121.1, 120.9, 118.2, 39.5, 34.9 ppm;  $^{11}\text{B}$  NMR (acetone, 128.4 MHz):  $\delta$  35.2 ppm;  $^{19}\text{F}$   $\{^1\text{H}\}$  NMR (acetone- $d_6$ , 470.8 MHz):  $\delta$  -62.9 ppm; IR:  $\nu$  = 1595, 1571, 1459, 1438, 1322, 1293, 1150, 1112, 1104, 1063, 1019, 969, 953, 835, 763, 749  $\text{cm}^{-1}$ ; HRMS (ESI)  $m/z$  calc. for  $\text{C}_{22}\text{H}_{19}\text{BF}_3\text{N}_2$   $[\text{M} + \text{H}]^+$  379.1593, found 379.1599.

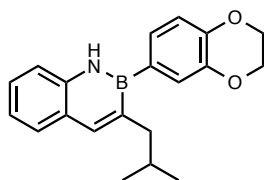

**3-(Isobutyl)-2-(2,3-dihydro-1,4-benzodioxin-6-yl)-2,1-borazanaphthalene (7):** obtained as a white solid (78 mg, 94%), starting from **1f** (69 mg, 0.26 mmol); mp = 78 °C;  $^1\text{H}$  NMR ( $\text{CDCl}_3$ , 500.4 MHz):  $\delta$  8.09 (br s, 1 H), 7.77 (s, 1 H), 7.60 (d,  $J$  = 7.5 Hz, 1 H), 7.33 (ddd,  $J$  = 8.2, 7.0, 1.1 Hz, 1 H), 7.20 (d,  $J$  = 8.3 Hz, 1 H), 7.15 (t,  $J$  = 7.2 Hz, 1 H), 8.97 (dd,  $J$  = 5.8, 3.2 Hz, 1 H), 6.92–6.86 (m, 2 H), 4.26–4.17 (m, 4 H), 2.52 (d,  $J$  = 7.2 Hz, 2 H), 1.67 (tsept, 6.6, 7.2 Hz, 1 H), 0.79 (d,  $J$  = 6.6 Hz, 6 H) ppm;  $^{13}\text{C}$   $\{^1\text{H}\}$  NMR ( $\text{CDCl}_3$ , 125.8 MHz):  $\delta$  145.3, 143.1, 142.3, 138.8, 128.7, 127.1, 125.8, 125.4, 121.3, 121.0, 117.6, 117.5, 64.3, 64.2, 45.1, 29.2, 22.6 ppm;  $^{11}\text{B}$  NMR (acetone, 128.4 MHz):  $\delta$  36.5 ppm; IR:  $\nu$  = 2946, 1614, 1597, 1565, 1454, 1437, 1422, 1377, 1280, 1252, 1217, 1200, 1093, 1082, 930, 895, 843  $\text{cm}^{-1}$ ; HRMS (ESI)  $m/z$  calc. for  $\text{C}_{20}\text{H}_{23}\text{BNO}_2$   $[\text{M} + \text{H}]^+$  320.1822, found 320.1836.

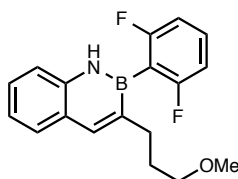

**3-(3-Methoxypropyl)-2-(2,6-difluorophenyl)-2,1-borazanaphthalene (8):** obtained as a white solid from (150 mg, 96%); mp = 73 °C;  $^1\text{H}$  NMR (acetone- $d_6$ , 500.4 MHz):  $\delta$  9.91 (br s, 1 H), 7.96 (s, 1 H), 7.71 (d,  $J$  = 9.1 Hz, 1 H), 7.61 (d,  $J$  = 8.0 Hz, 1 H), 7.47–7.40 (m, 2 H), 7.22 (ddd,  $J$  = 8.1, 7.0, 1.1 Hz, 1 H), 7.03–6.95 (m, 2 H), 3.25 (t,  $J$  = 6.7 Hz, 2 H), 3.15 (s, 3 H), 2.63 (t,  $J$  = 8.2 Hz, 2 H), 1.69 (tt,  $J$  = 8.3, 6.7 Hz, 2 H) ppm;  $^{13}\text{C}$   $\{^1\text{H}\}$  NMR ( $\text{CDCl}_3$ , 125.8 MHz):  $\delta$  164.4 (dd,  $J$  = 238.9, 16.7 Hz), 141.7, 139.4, 131.0 (t,  $J$  = 10.1 Hz), 128.7, 127.5, 125.6, 121.3, 118.1, 110.7 (dd,  $J$  = 21.8, 5.7 Hz), 71.8, 57.3, 31.4, 30.6 ppm;  $^{11}\text{B}$  NMR (acetone, 128.4 MHz):  $\delta$  33.6 ppm;  $^{19}\text{F}$   $\{^1\text{H}\}$  NMR (acetone- $d_6$ , 470.8 MHz):  $\delta$  -103.2 ppm; IR:  $\nu$  = 3274, 1617, 1573, 1462, 1444, 1227, 1213, 1110, 1101, 1060, 976, 966, 943, 852, 777, 760  $\text{cm}^{-1}$ ; HRMS (ESI)  $m/z$  calc. for  $\text{C}_{18}\text{H}_{19}\text{BF}_2\text{NO}$   $[\text{M} + \text{H}]^+$  314.1528, found 314.1536.



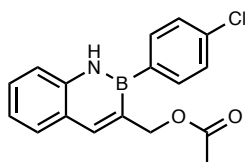

**3-(Acetoxymethyl)-2-(4-chlorophenyl)-2,1-borazanaphthalene (9):** obtained as a white solid (94 mg, 60%); mp = 122 °C;  $^1\text{H}$  NMR (acetone- $d_6$ , 500.4 MHz):  $\delta$  9.73 (br s, 1 H), 8.13 (s, 1 H), 7.76–7.71 (m, 3 H), 7.65 (d,  $J$  = 8.7 Hz, 1 H), 7.50–7.42 (m, 3 H), 7.22 (ddd,  $J$  = 8.2, 6.7, 1.1 Hz, 1 H), 5.19 (s, 2 H), 2.03 (s, 3 H) ppm;  $^{13}\text{C}$   $\{^1\text{H}\}$  NMR (acetone- $d_6$ , 125.8 MHz):  $\delta$  169.9, 142.9, 140.5, 134.6, 134.2, 129.2, 128.6, 127.7, 124.6, 121.2, 118.3, 66.2, 20.0 ppm;  $^{11}\text{B}$  NMR (acetone, 128.4 MHz):  $\delta$  34.9 ppm; IR:  $\nu$  = 3324, 1720, 1616, 1587, 1575, 1454, 1431, 1367, 1340, 1246, 1210, 1100, 1088, 1034, 1013, 961, 792  $\text{cm}^{-1}$ ; HRMS (ESI)  $m/z$  calc. for  $\text{C}_{17}\text{H}_{15}\text{BClNNaO}_2$   $[\text{M} + \text{Na}]^+$  334.0782, found 334.0796.

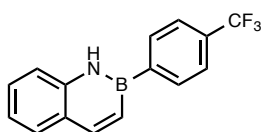

**2-(4-(Trifluoromethyl)phenyl)-2,1-borazanaphthalene (10a):** obtained as an off white powder (0.42 g, 27%, 5.00 mmol scale); mp = 154 °C;  $^1\text{H}$  NMR (DMSO- $d_6$ , 500.4 MHz):  $\delta$  10.67 (br s, 1 H), 8.28 (d,  $J$  = 6.6 Hz, 2 H), 8.22 (d,  $J$  = 12.1 Hz, 1 H), 7.82 (d,  $J$  = 7.7 Hz, 2 H), 7.75 (t,  $J$  = 8.8 Hz, 2 H), 7.51 (ddd,  $J$  = 8.7, 7.3, 1.7 Hz, 1 H), 7.28 (dd,  $J$  = 11.9, 1.5 Hz, 1 H), 7.22 (ddd,  $J$  = 7.8, 7.4, 1.5 Hz, 1 H) ppm;  $^{13}\text{C}$   $\{^1\text{H}\}$  NMR (DMSO- $d_6$ , 125.8 MHz):  $\delta$  146.2, 141.1, 134.4, 130.0 (q,  $J$  = 31.1 Hz), 129.5, 128.9, 125.7, 124.9 (q,  $J$  = 273.3 Hz), 124.8 (q,  $J$  = 5.3 Hz), 121.4, 119.2 ppm;  $^{11}\text{B}$  NMR (acetone, 128.4 MHz):  $\delta$  33.8 ppm;  $^{19}\text{F}$   $\{^1\text{H}\}$  NMR (DMSO- $d_6$ , 470.8 MHz):  $\delta$  -61.2 ppm; IR:  $\nu$  = 1614, 1560, 1434, 1326, 1205, 1168, 1159, 1117, 1104, 1069, 1015, 989, 978, 838, 811, 761  $\text{cm}^{-1}$ ; HRMS (ESI)  $m/z$  calc. for  $\text{C}_{15}\text{H}_{10}\text{BF}_3\text{N}$   $[\text{M} - \text{H}]^+$  272.0858, found 272.0853.

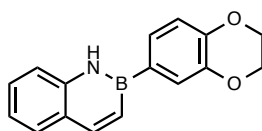

**2-(2,3-Dihydro-1,4-benzodioxin-6-yl)-2,1-borazanaphthalene (10b):** obtained as an off white powder (1.73 g, 84%, 7.80 mmol scale) from **10b**; mp = 89 °C;  $^1\text{H}$  NMR (DMSO- $d_6$ , 500.4 MHz):  $\delta$  10.23 (br s, 1 H), 8.07 (d,  $J$  = 10.6 Hz, 1 H), 7.68 (d,  $J$  = 8.7 Hz, 1 H), 7.64 (d,  $J$  = 7.8 Hz, 1 H), 7.62–7.59 (m, 1 H), 7.54 (dd,  $J$  = 8.1, 1.4 Hz, 1 H), 7.42 (ddd,  $J$  = 8.4, 6.9, 1.4 Hz, 1 H), 7.17 (dd,  $J$  = 11.2, 1.6 Hz, 1 H), 7.13 (ddd,  $J$  = 8.4, 7.2, 1.0 Hz, 1 H), 6.93 (d,  $J$  = 7.9 Hz, 1 H), 4.28 (s, 4 H) ppm;  $^{13}\text{C}$   $\{^1\text{H}\}$  NMR (DMSO- $d_6$ , 125.8 MHz):  $\delta$  145.4, 145.3, 143.7, 141.7, 129.3, 128.6, 127.2, 125.3, 122.2, 120.8, 118.9, 117.2, 64.7, 64.4 ppm;  $^{11}\text{B}$  NMR (acetone, 128.4 MHz):  $\delta$  33.8 ppm; IR:  $\nu$  = 3341, 1613, 1605, 1596, 1564, 1510, 1455, 1438, 1303, 1284, 1250, 1216, 1127, 1068, 1047, 898, 803  $\text{cm}^{-1}$ ; HRMS (CI)  $m/z$  calc. for  $\text{C}_{16}\text{H}_{14}\text{BNO}_2$   $[\text{M}]^+$  263.1118, found 263.1132.

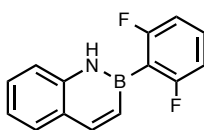

**2-(2,6-Difluorophenyl)-2,1-borazanaphthalene (10c):** obtained as an off white powder (0.67 g, 56%, 5.00 mmol scale); mp = 54 °C;  $^1\text{H}$  NMR (DMSO- $d_6$ , 500.4 MHz):  $\delta$  10.69 (br s,

1 H), 8.20 (d,  $J = 10.9$  Hz, 1 H), 7.76 (d,  $J = 7.3$  Hz, 1 H), 7.68 (d,  $J = 8.5$  Hz, 1 H), 7.55–7.48 (m, 2 H), 7.24 (t,  $J = 7.6$  Hz, 1 H), 7.12 (t,  $J = 7.3$  Hz, 2 H), 7.02 (d,  $J = 11.5$  Hz, 1 H) ppm;  $^{13}\text{C}$   $\{^1\text{H}\}$  NMR (DMSO- $d_6$ , 125.8 MHz):  $\delta$  165.0 (dd,  $J = 240.1, 16.1$  Hz), 145.5, 140.7, 132.5 (t,  $J = 12.0$  Hz), 129.5, 128.9, 125.4, 121.6, 119.2, 111.5 (dd,  $J = 22.1, 5.9$  Hz) ppm;  $^{19}\text{F}$  NMR (DMSO- $d_6$ , 470.8 MHz):  $\delta$  -102.7 ppm;  $^{11}\text{B}$  NMR (acetone, 128.4 MHz):  $\delta$  32.3 ppm; IR:  $\nu = 1615, 1558, 1463, 1452, 1429, 1385, 1345, 1276, 1247, 1217, 1202, 990, 973, 943, 810, 779$   $\text{cm}^{-1}$ ; HRMS (CI)  $m/z$  calc. for  $\text{C}_{14}\text{H}_{10}\text{BF}_2\text{N}$   $[\text{M}]^+$  241.0874, found 241.0871.

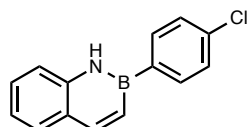

**2-(4-Chlorophenyl)-2,1-borazanaphthalene (10d)**: obtained as an off white powder (0.40 g, 83%, 2.00 mmol scale); mp = 140 °C;  $^1\text{H}$  NMR (DMSO- $d_6$ , 500.4 MHz):  $\delta$  10.50 (br s, 1 H), 8.17 (d,  $J = 11.5$  Hz, 1 H), 8.10 (d,  $J = 8.1$  Hz, 2 H), 7.73 (d,  $J = 8.3$  Hz, 1 H), 7.70 (d,  $J = 7.7$  Hz, 1 H), 7.53 (d,  $J = 8.3$  Hz, 2 H), 7.48 (ddd,  $J = 8.5, 7.2, 1.5$  Hz, 1 H), 7.24 (dd,  $J = 11.6, 1.8$  Hz, 1 H), 7.19 (ddd,  $J = 8.1, 6.6, 1.1$  Hz, 1 H) ppm;  $^{13}\text{C}$   $\{^1\text{H}\}$  NMR (DMSO- $d_6$ , 125.8 MHz):  $\delta$  145.8, 141.2, 135.6, 135.0, 129.4, 128.8, 128.3, 125.5, 121.1, 119.0 ppm;  $^{11}\text{B}$  NMR (acetone, 128.4 MHz):  $\delta$  34.1 ppm; IR:  $\nu = 1611, 1582, 1556, 1494, 1434, 1392, 1345, 1280, 1223, 1205, 1117, 1089, 1010, 975, 822, 808$   $\text{cm}^{-1}$ ; HRMS (ESI)  $m/z$  calc. for  $\text{C}_{14}\text{H}_{11}\text{BCl}_2\text{N}$   $[\text{M} + \text{Cl}]^-$  274.0362, found 274.0363.

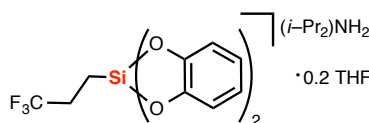

**Diisopropylammonium bis(catecholato)3,3,3-trifluoropropylsilicate (11a)**: obtained as a white powder (6.31 g, 92%, 15.00 mmol scale), crystallized with 0.2 equiv THF, mp 237 °C;  $^1\text{H}$  NMR (DMSO- $d_6$ , 500.4 MHz):  $\delta$  8.02 (br s, 2 H), 6.59–6.55 (m, 4 H), 6.49–6.45 (m, 4 H), 3.34 (sept,  $J = 6.9$  Hz, 2 H), 2.04–1.96 (m, 2 H), 1.19 (d,  $J = 6.9$  Hz, 12 H), 0.68–0.62 (m, 2 H) ppm;  $^{13}\text{C}$   $\{^1\text{H}\}$  NMR (DMSO- $d_6$ , 125.8 MHz):  $\delta$  150.6, 128.8 (q,  $J = 277.9$  Hz), 117.9, 110.2, 46.8, 28.9 (q,  $J = 28.9$  Hz), 19.2, 9.54 ppm;  $^{19}\text{F}$   $\{^1\text{H}\}$  NMR ( $\text{CDCl}_3$ , 470.8 MHz): -67.3 ppm; IR:  $\nu = 2987, 1707, 1599, 1484, 1392, 1349, 1321, 1297, 1238, 1167, 1149, 1098, 1014, 938, 891, 811$   $\text{cm}^{-1}$ ; HRMS (ESI)  $m/z$  calc. for  $\text{C}_{15}\text{H}_{12}\text{F}_3\text{O}_4\text{Si}$   $[\text{M} - i\text{-Pr}_2\text{NH}_2]^+$  341.0457, found 341.0462.

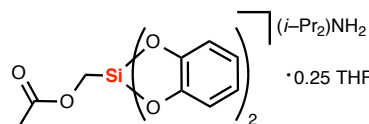

**Diisopropylammonium bis(catecholato)acetoxymethylsilicate (11b)**: obtained as a white powder (1.71 g, 76%, 5.15 mmol scale), mp 127 °C;  $^1\text{H}$  NMR (acetone- $d_6$ , 500.4 MHz):  $\delta$  7.43 (br s, 2 H), 6.69–6.63 (m, 4 H), 6.54–6.50 (m, 4 H), 3.82 (sept,  $J = 6.7$  Hz, 2 H), 3.80 (s, 2 H), 1.74 (s, 3 H), 1.43 (d,  $J = 6.7$  Hz, 12 H) ppm;  $^{13}\text{C}$   $\{^1\text{H}\}$  NMR (acetone- $d_6$ , 125.8 MHz):  $\delta$  170.5, 150.0, 118.0, 110.3, 56.2, 48.3, 19.9, 18.6 ppm; IR:  $\nu = 1725, 1483, 1393, 1365, 1347, 1294, 1235, 1148, 1098, 1038, 1014, 887, 814, 771, 738, 707$   $\text{cm}^{-1}$ ; HRMS (ESI)  $m/z$  calc. for  $\text{C}_{15}\text{H}_{13}\text{O}_6\text{Si}$   $[\text{M} - i\text{-Pr}_2\text{NH}_2]^+$  317.0481, found 317.0482.

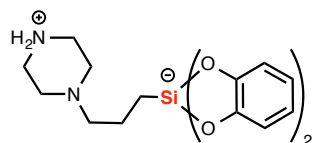

**Bis(catecholato)3-(piperazin-1-ium-1-yl)propyl silicate (11c):** obtained as a white powder (909 mg, 71%, 3.44 mmol scale), mp >260 °C;  $^1\text{H}$  NMR (DMSO- $d_6$ , 500.4 MHz):  $\delta$  8.16 (br s, 2 H), 6.53–6.50 (m, 4 H), 6.46–6.41 (m, 4 H), 2.98–2.96 (m, 4 H), 2.43–2.42 (m, 4 H), 2.20 (t,  $J = 7.0$  Hz, 2 H), 1.36 (tt,  $J = 7.7, 7.7$  Hz, 2 H), 0.47 (t,  $J = 7.0$  Hz, 2 H) ppm;  $^{13}\text{C}$  { $^1\text{H}$ } NMR (DMSO- $d_6$ , 125.8 MHz):  $\delta$  150.9, 117.5, 109.9, 61.1, 49.9, 43.4, 21.4, 15.7 ppm; IR:  $\nu = 2812, 1488, 1457, 1352, 1243, 1223, 1198, 1174, 1104, 1015, 889, 828, 769, 738, 724, 716$   $\text{cm}^{-1}$ ; HRMS (ESI)  $m/z$  calc. for  $\text{C}_{19}\text{H}_{24}\text{N}_2\text{O}_4\text{Si}$  [ $\text{M}$ ] $^+$  372.1505, found 372.1506.

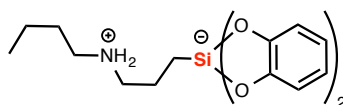

**Bis(catecholato)3-(butylammonio)propyl silicate (11d):** obtained as a white powder (6.86 g, 90%, 21.25 mmol scale), mp 225 °C;  $^1\text{H}$  NMR (DMSO- $d_6$ , 500.4 MHz):  $\delta$  8.00 (br s, 2 H), 6.57–6.51 (m, 4 H), 6.48–6.42 (m, 4 H), 2.76–2.68 (m, 4 H), 1.58–1.49 (m, 2 H), 1.48–1.40 (m, 2 H), 1.25 (tt,  $J = 7.0, 7.0$  Hz, 2 H), 0.84 (t,  $J = 7.4$  Hz, 3 H), 0.52 (t,  $J = 8.0$  Hz, 2 H) ppm;  $^{13}\text{C}$  { $^1\text{H}$ } NMR (DMSO- $d_6$ , 125.8 MHz):  $\delta$  150.7, 117.7, 110.1, 50.3, 46.9, 27.8, 21.9, 19.6, 15.3, 13.8 ppm; IR:  $\nu = 3031, 1485, 1460, 1435, 1352, 1257, 1236, 1222, 1194, 1102, 1015, 888, 830, 753, 730, 697, 656$   $\text{cm}^{-1}$ ; HRMS (ESI)  $m/z$  calc. for  $\text{C}_{19}\text{H}_{24}\text{NO}_4\text{Si}$  [ $\text{M} - \text{H}$ ] $^-$  358.1475, found 358.1479.

## Spectral data

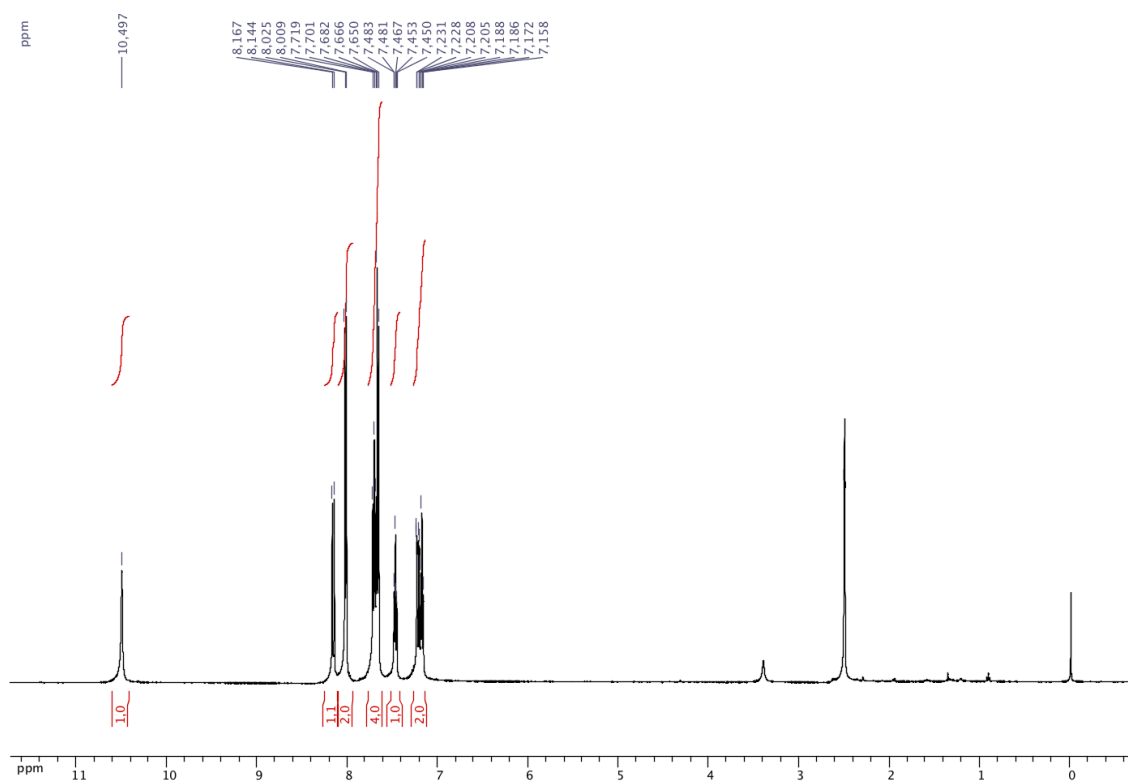

$^1\text{H}$  NMR (DMSO- $d_6$ , 500.4 MHz) of 2-(4-bromophenyl)-2,1-borazanaphthalene (**1a**)

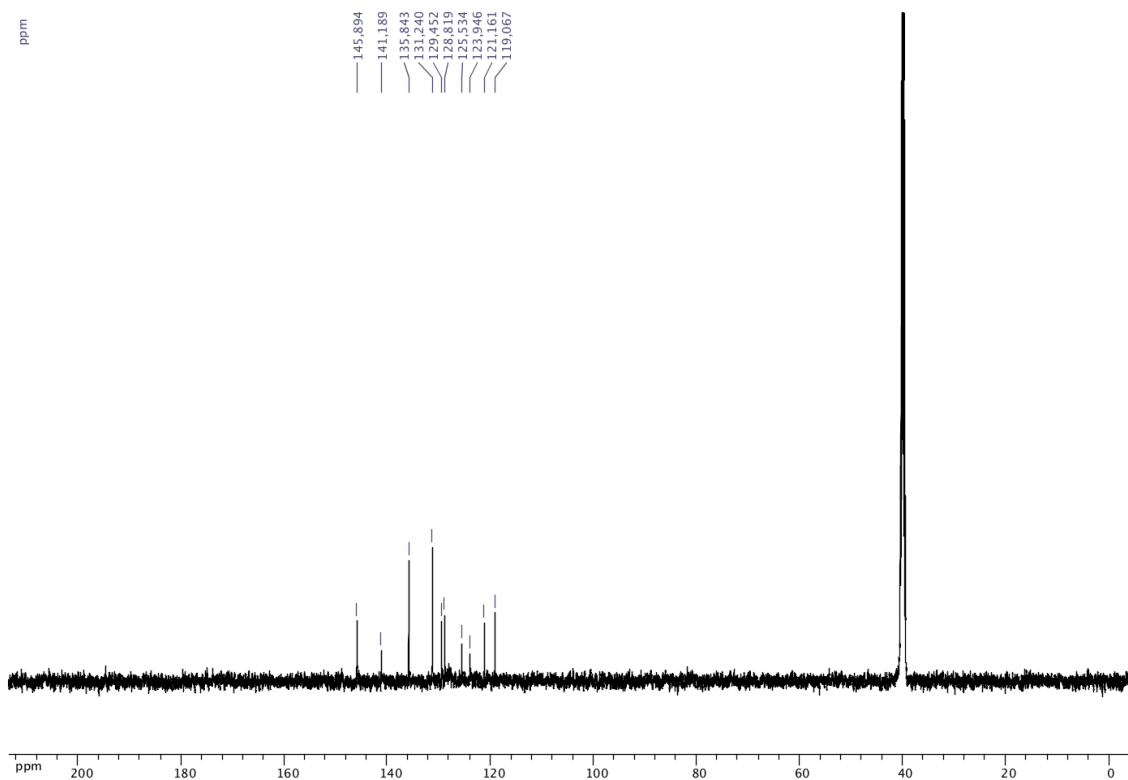

$^{13}\text{C}$   $\{^1\text{H}\}$  NMR (DMSO- $d_6$ , 125.8 MHz) of 2-(4-bromophenyl)-2,1-borazanaphthalene (**1a**)

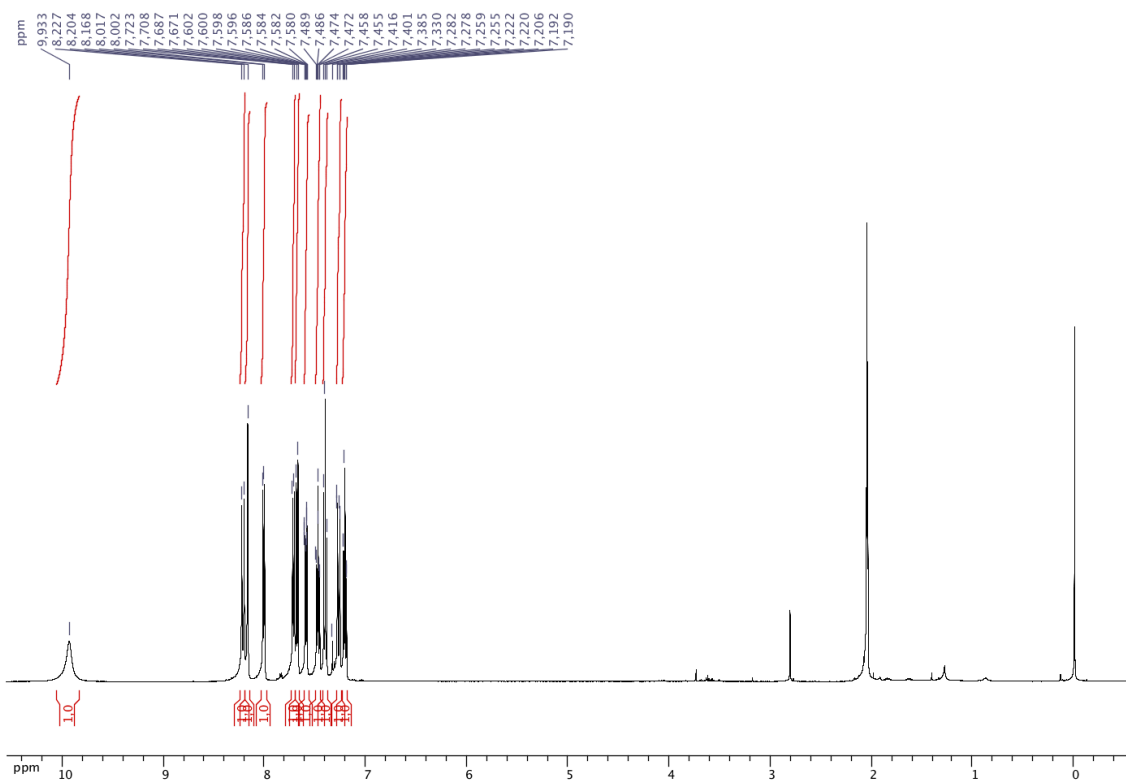

$^1\text{H}$  NMR (acetone- $d_6$ , 500.4 MHz) of 2-(3-bromophenyl)-2,1-borazanaphthalene (**1b**)

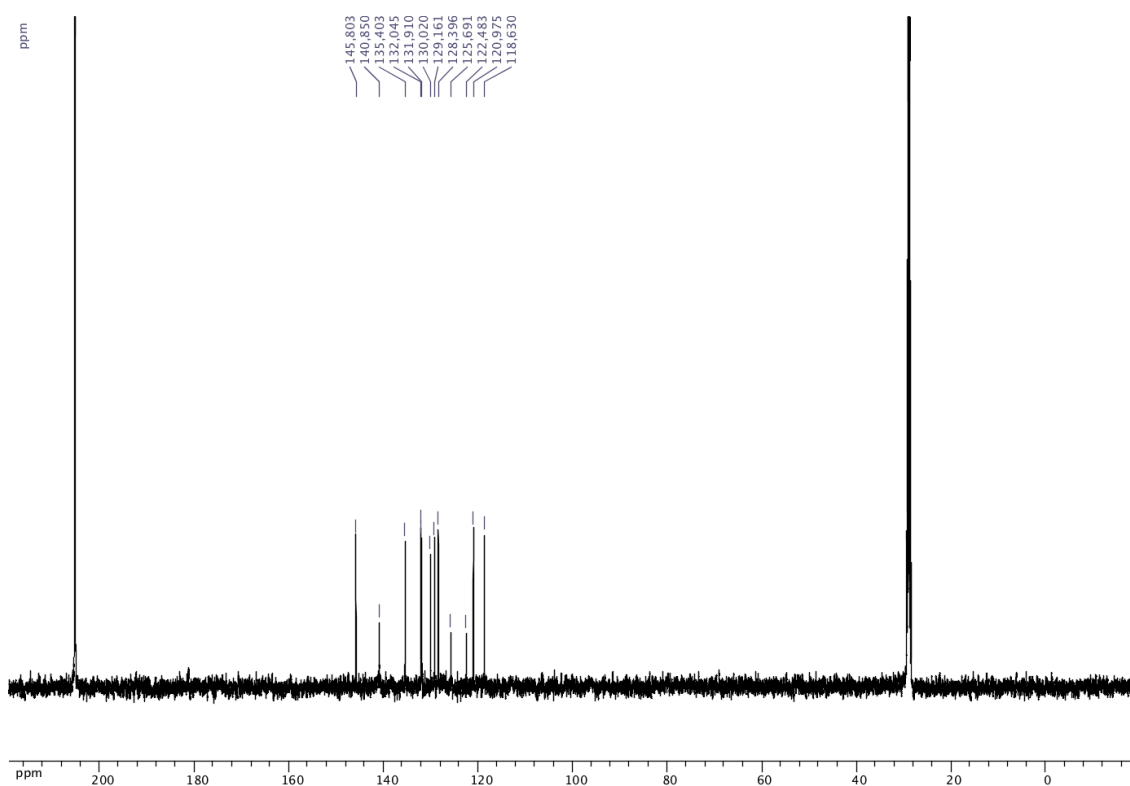

$^{13}\text{C}$   $\{^1\text{H}\}$  NMR (acetone- $d_6$ , 125.8 MHz) of 2-(3-bromophenyl)-2,1-borazanaphthalene (**1b**)

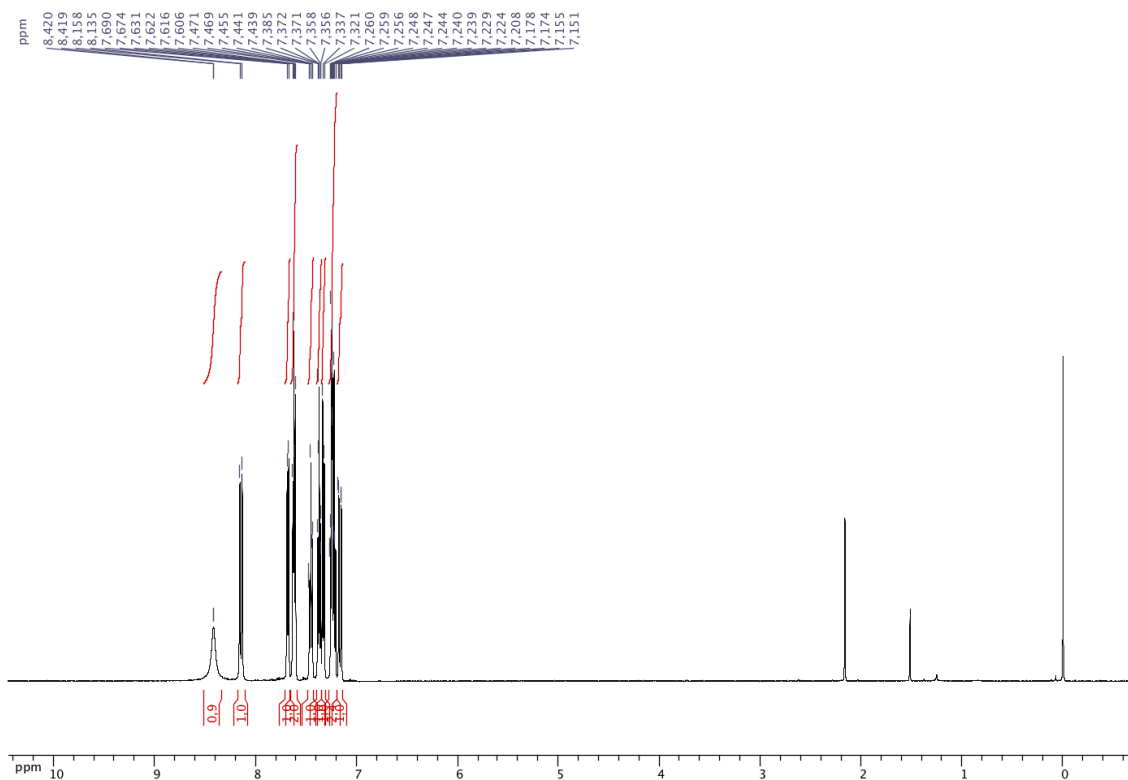

$^1\text{H}$  NMR ( $\text{CDCl}_3$ , 500.4 MHz) of 2-(2-bromophenyl)-2,1-borazanaphthalene (**1c**)

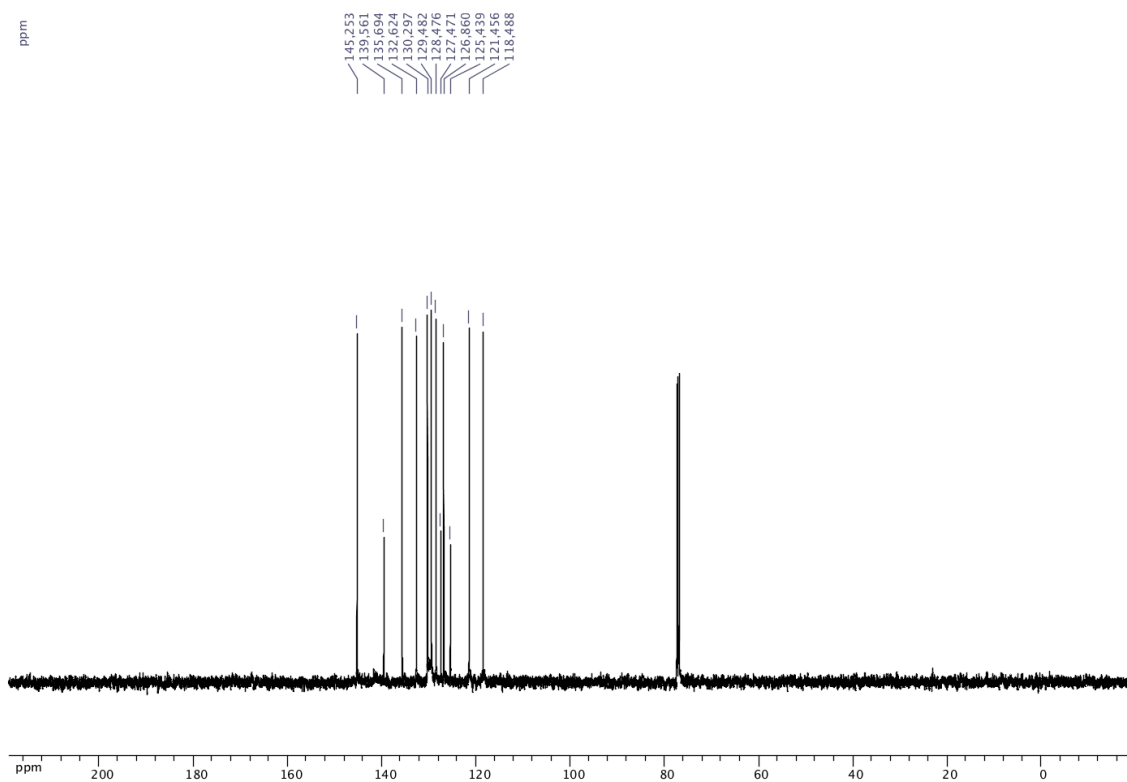

$^{13}\text{C}$   $\{^1\text{H}\}$  NMR ( $\text{CDCl}_3$ , 125.8 MHz) of 2-(2-bromophenyl)-2,1-borazanaphthalene (**1c**)

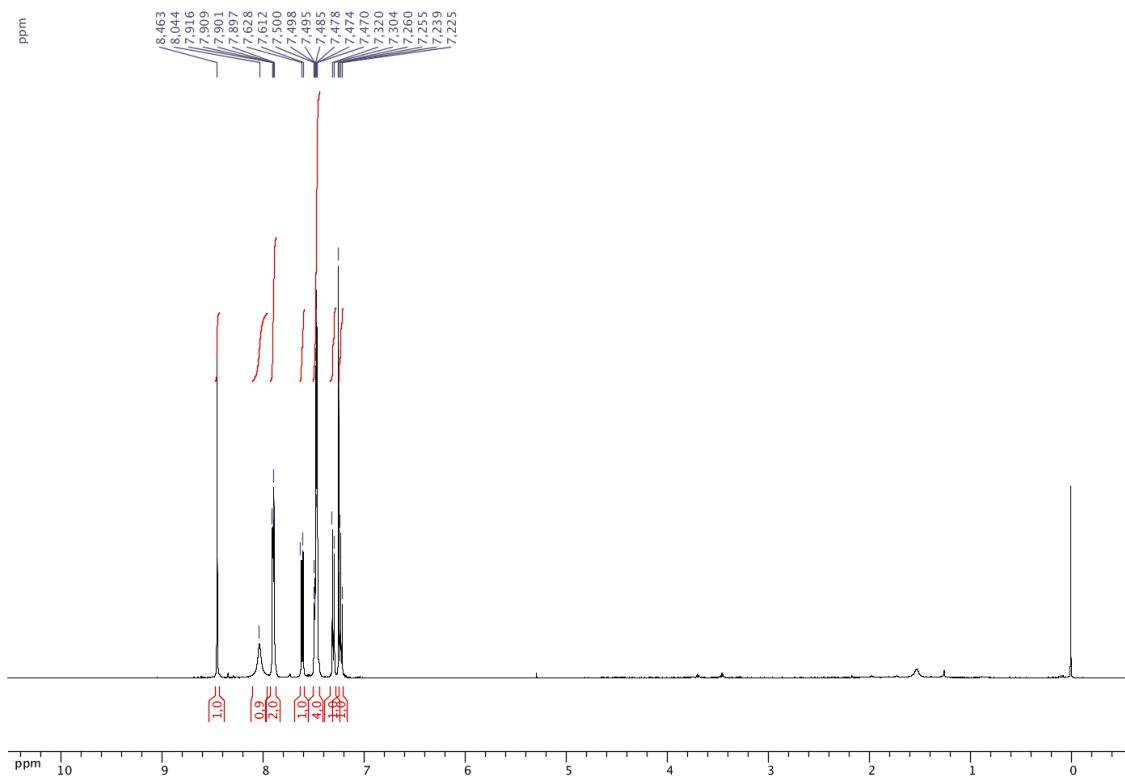

$^1\text{H}$  NMR (acetone- $d_6$ , 500.4 MHz) of 3-bromo-2-phenyl-2,1-borazanaphthalene (**1d**)

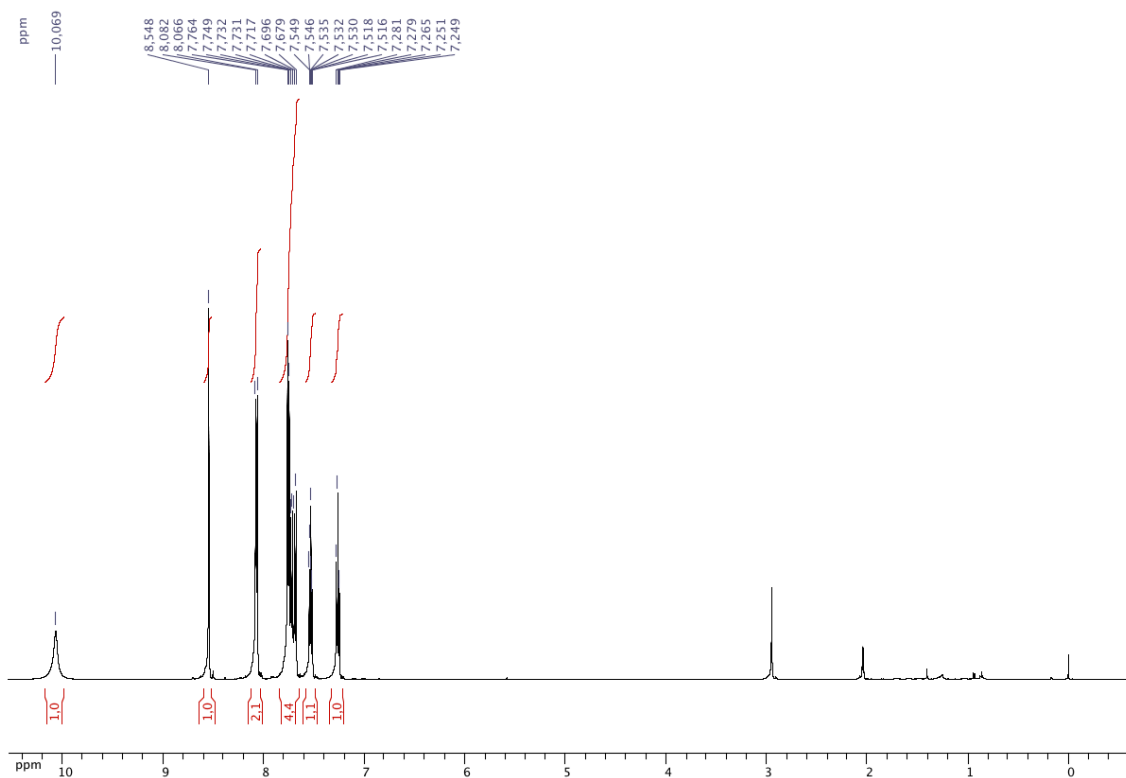

$^1\text{H}$  NMR (acetone- $d_6$ , 500.4 MHz) of 3-bromo-2-(4-(trifluoromethyl)phenyl)-2,1-borazanaphthalene (**1e**)

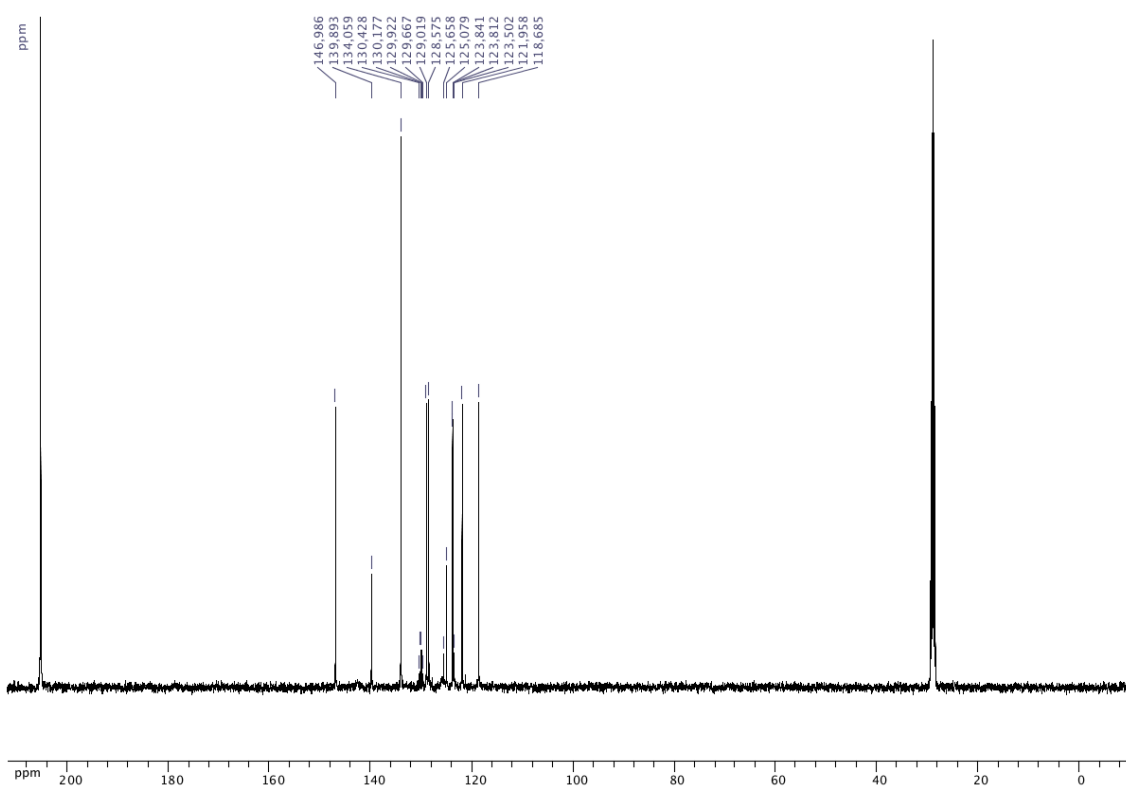

$^{13}\text{C}$   $\{^1\text{H}\}$  NMR (acetone- $d_6$ , 125.8 MHz) of 3-bromo-2-(4-(trifluoromethyl)phenyl)-2,1-borazanaphthalene (**1e**)



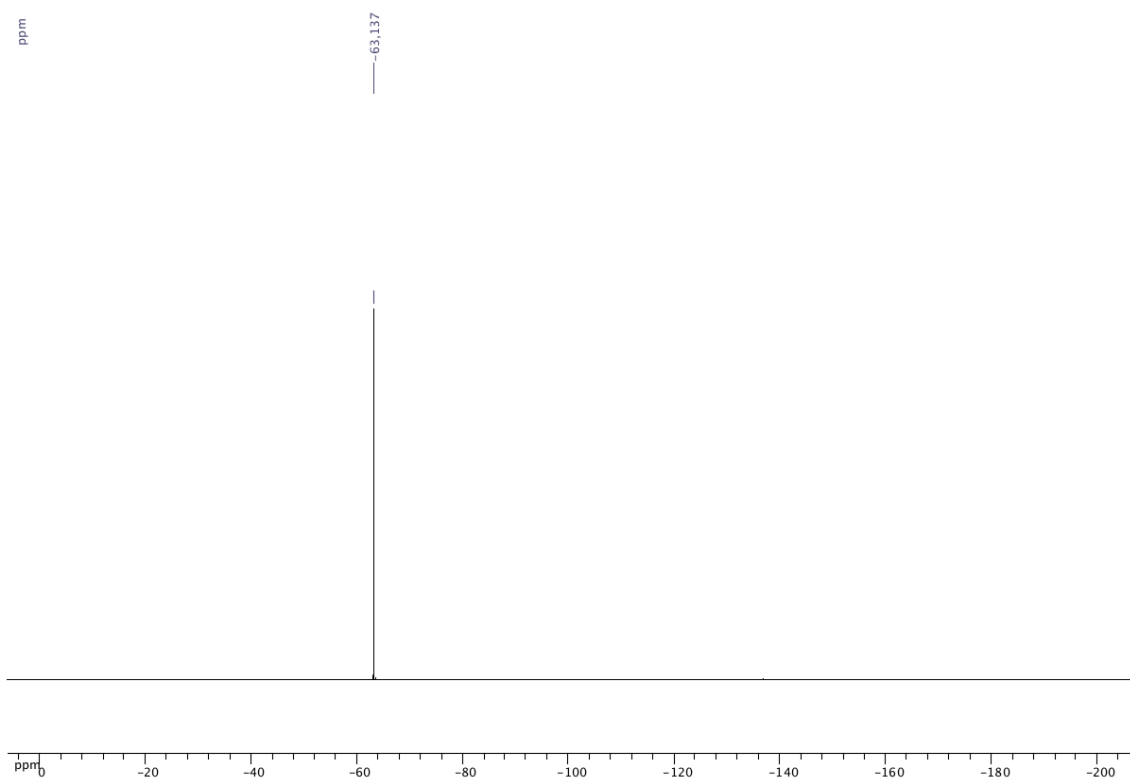

$^{19}\text{F}$   $\{^1\text{H}\}$  NMR (acetone- $d_6$ , 470.8 MHz) of 3-bromo-2-(4-(trifluoromethyl)phenyl)-2,1-borazanaphthalene (**1e**)

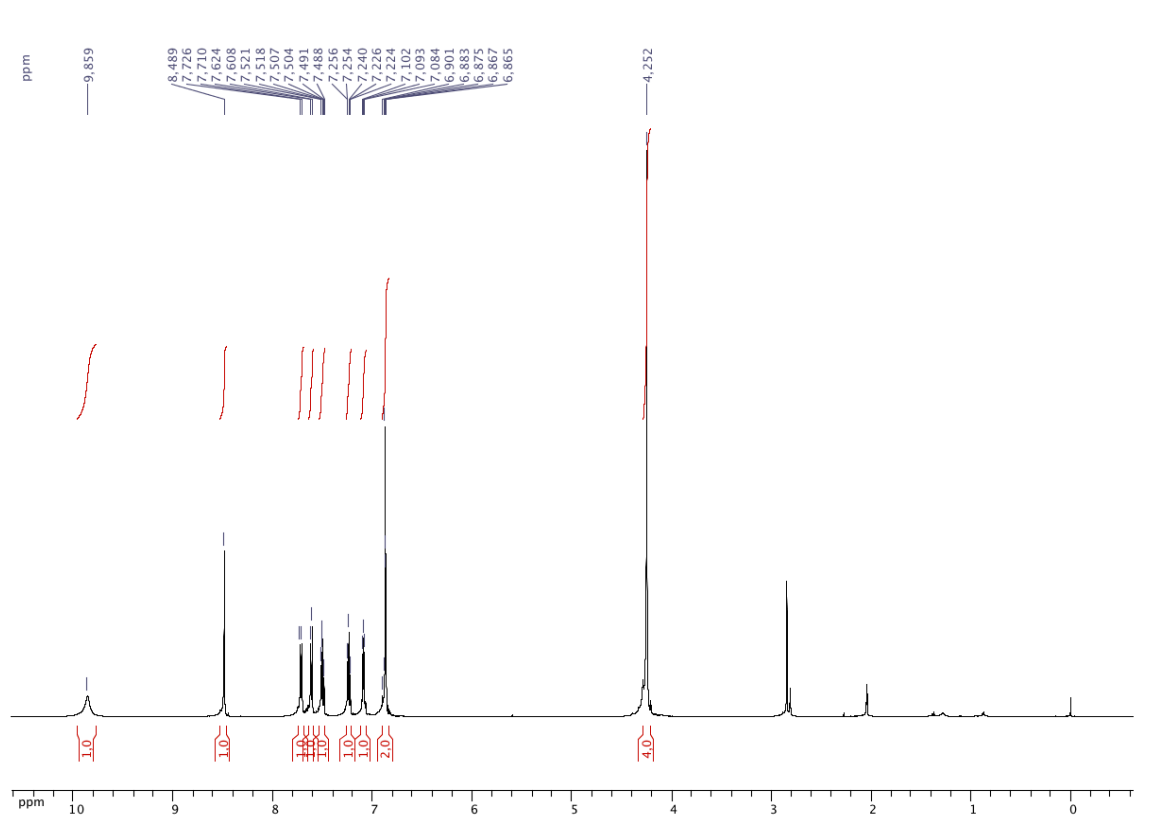

$^1\text{H}$  NMR (acetone- $d_6$ , 500.4 MHz) of 3-bromo-2-(2,3-dihydro-1,4-benzodioxin-6-yl)-2,1-borazanaphthalene (**1f**)

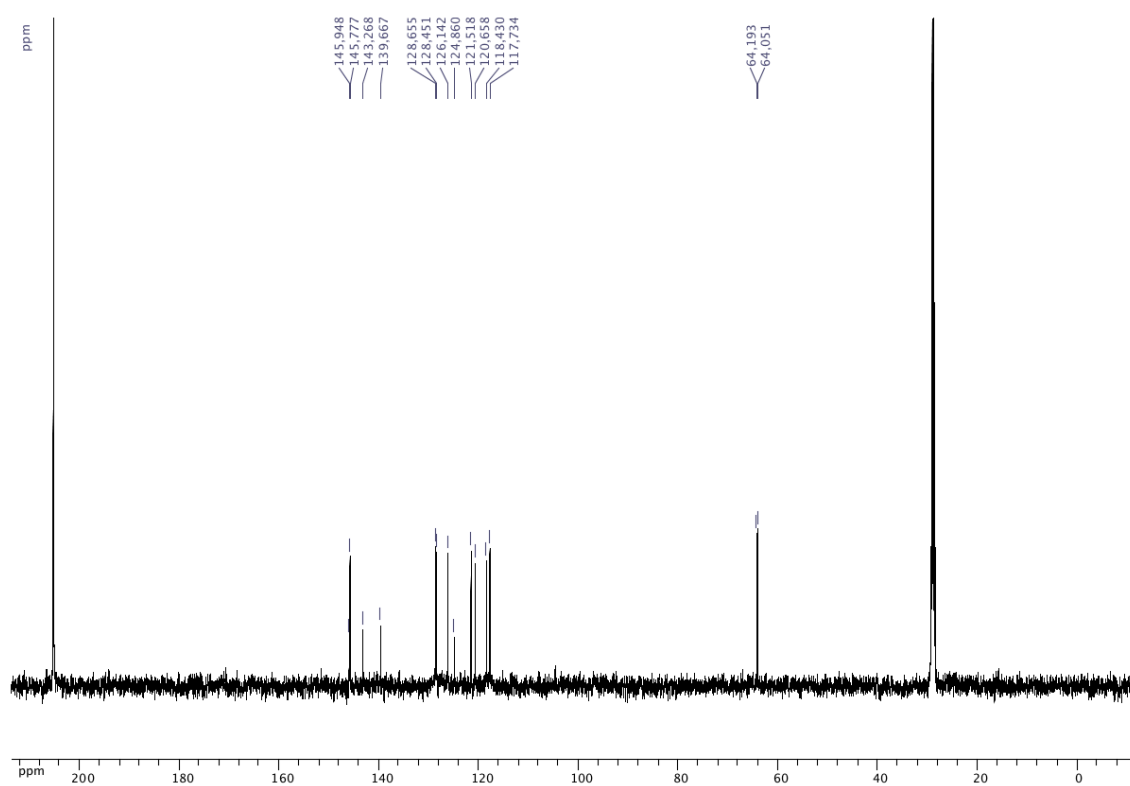

$^{13}\text{C}$   $\{^1\text{H}\}$  NMR (acetone- $d_6$ , 125.8 MHz) of 3-bromo-2-(2,3-dihydro-1,4-benzodioxin-6-yl)-2,1-borazanaphthalene (**1f**)

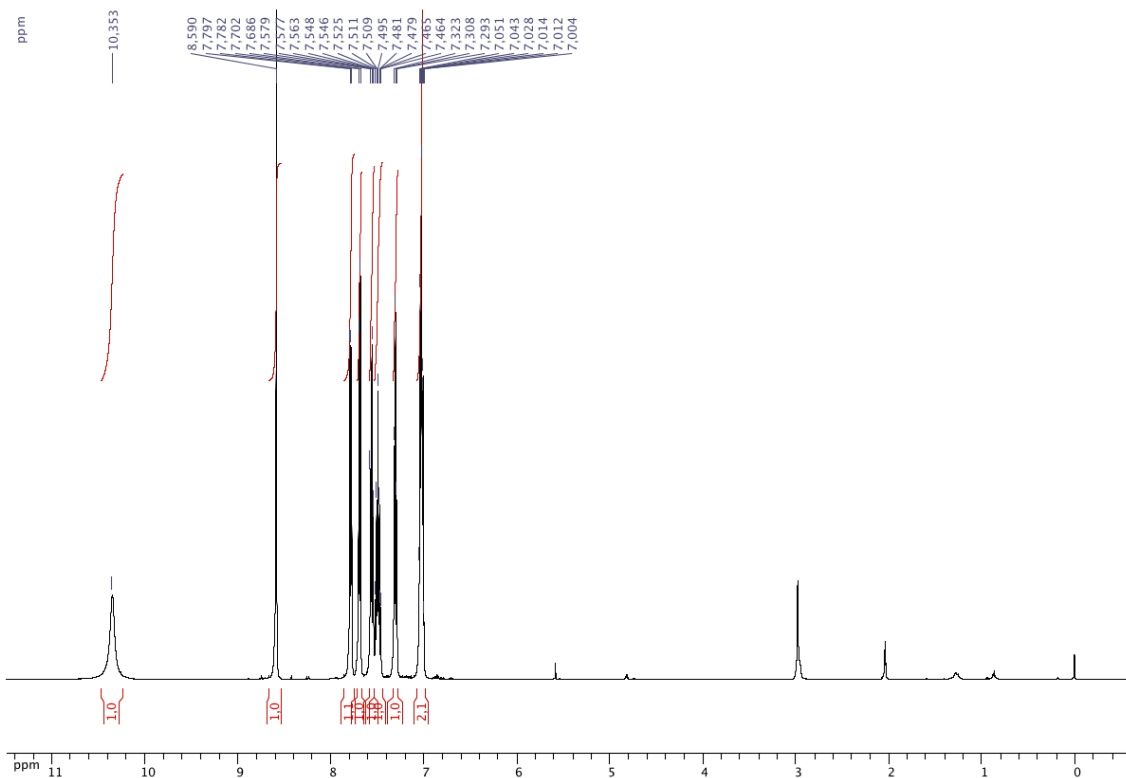

$^1\text{H}$  NMR (acetone- $d_6$ , 500.4 MHz) of 3-bromo-2-(2,6-difluorophenyl)-2,1-borazanaphthalene (**1g**)

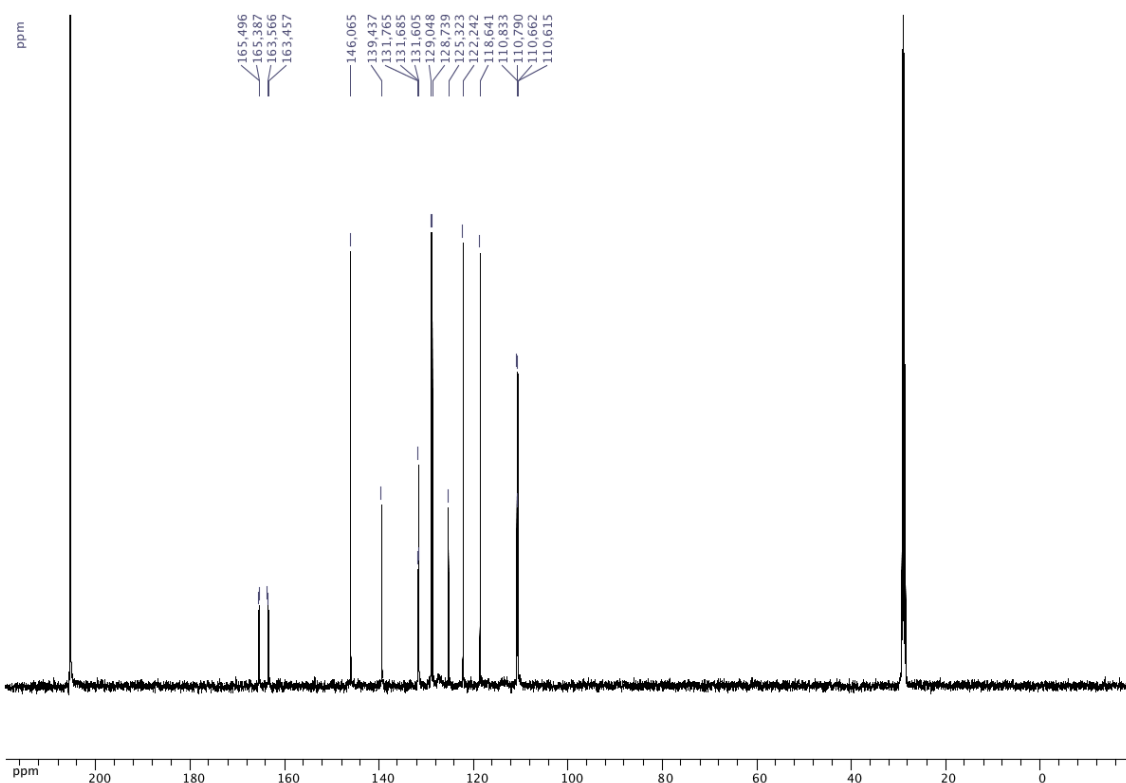

$^{13}\text{C}$   $\{^1\text{H}\}$  NMR (acetone- $d_6$ , 125.8 MHz) of 3-bromo-2-(2,6-difluorophenyl)-2,1-borazanaphthalene (**1g**)

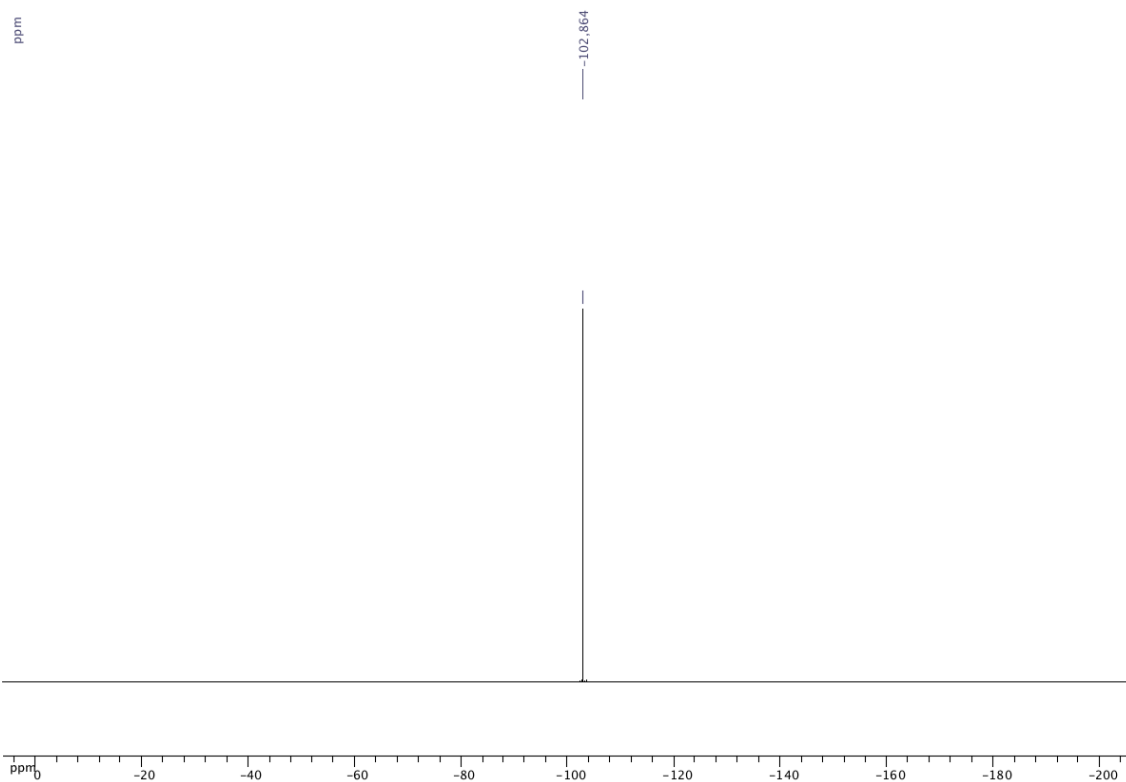

$^{19}\text{F}$   $\{^1\text{H}\}$  NMR (acetone- $d_6$ , 470.8 MHz) of 3-bromo-2-(2,6-difluorophenyl)-2,1-borazanaphthalene (**1g**)

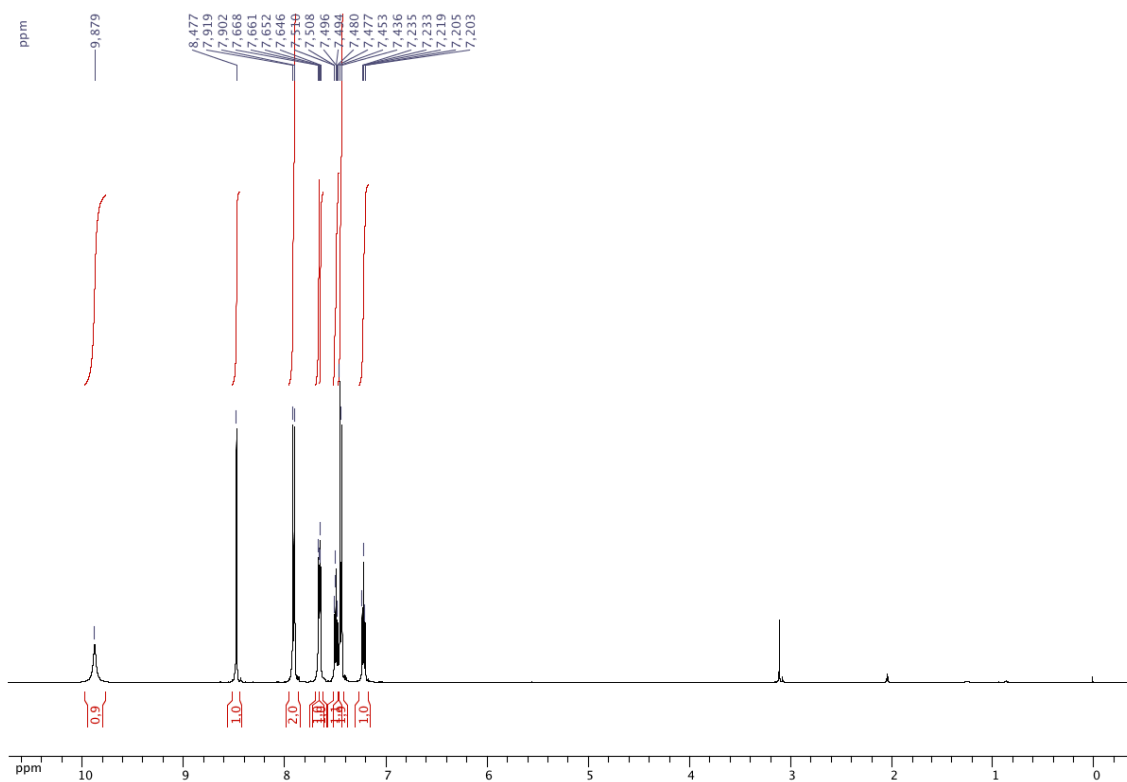

$^1\text{H}$  NMR (acetone- $d_6$ , 500.4 MHz) of 3-bromo-2-(4-chlorophenyl)-2,1-borazanaphthalene (**1h**)

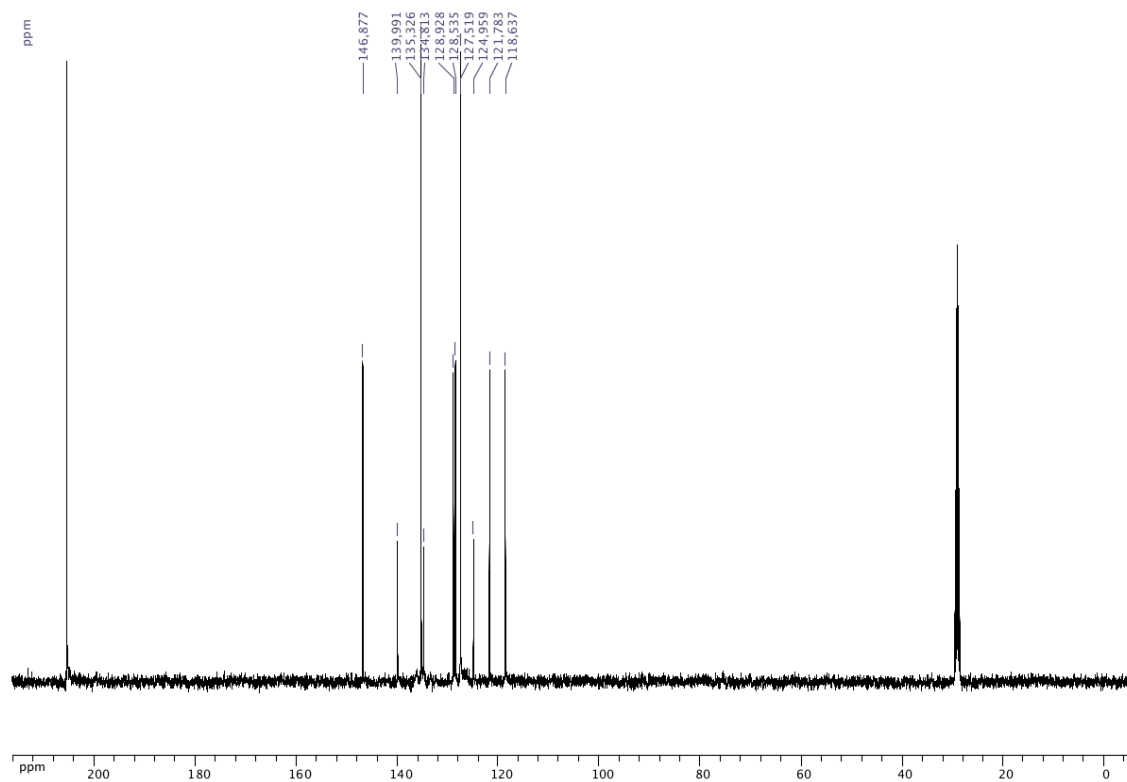

$^{13}\text{C}$   $\{^1\text{H}\}$  NMR (acetone- $d_6$ , 125.8 MHz) of 3-bromo-2-(4-chlorophenyl)-2,1-borazanaphthalene (**1h**)

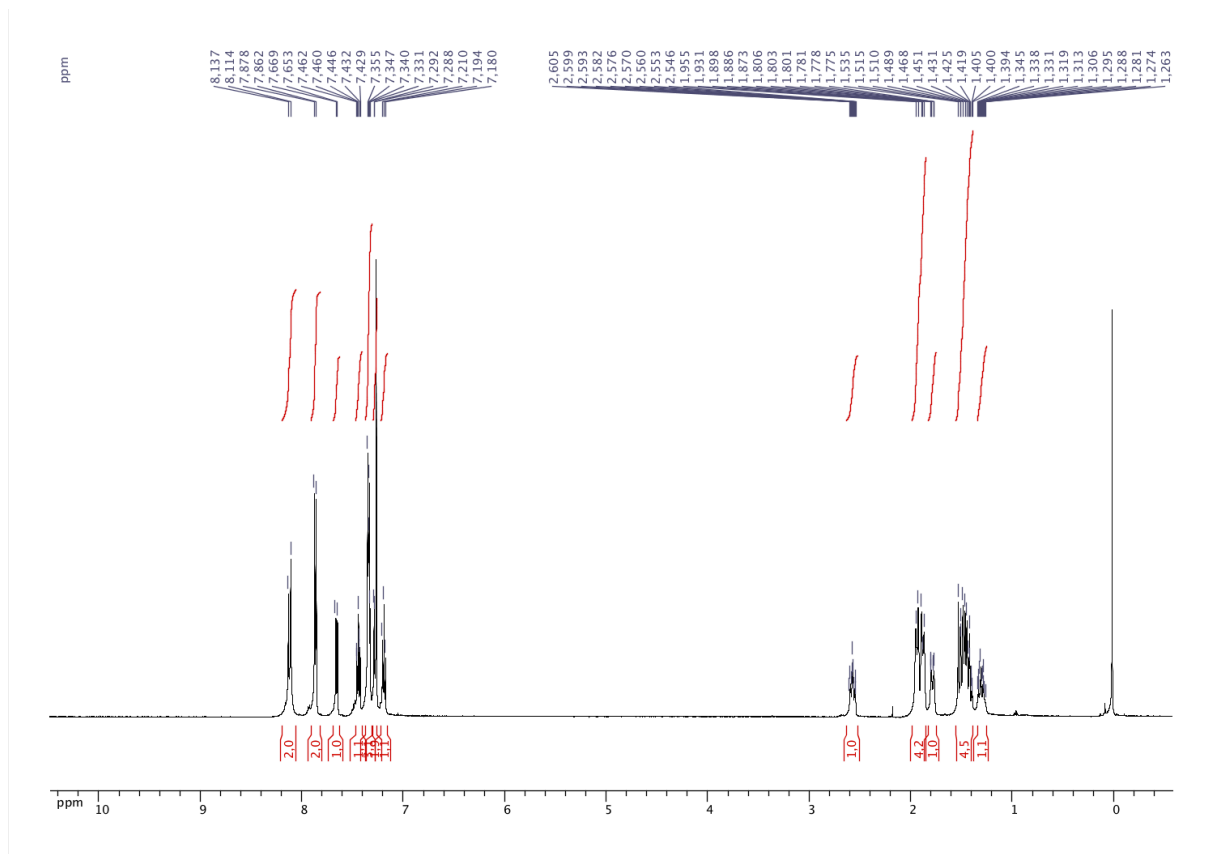

<sup>1</sup>H NMR (CDCl<sub>3</sub>, 500.4 MHz) of 2-(4-cyclohexylphenyl)-2,1-borazanaphthalene (**2a**)

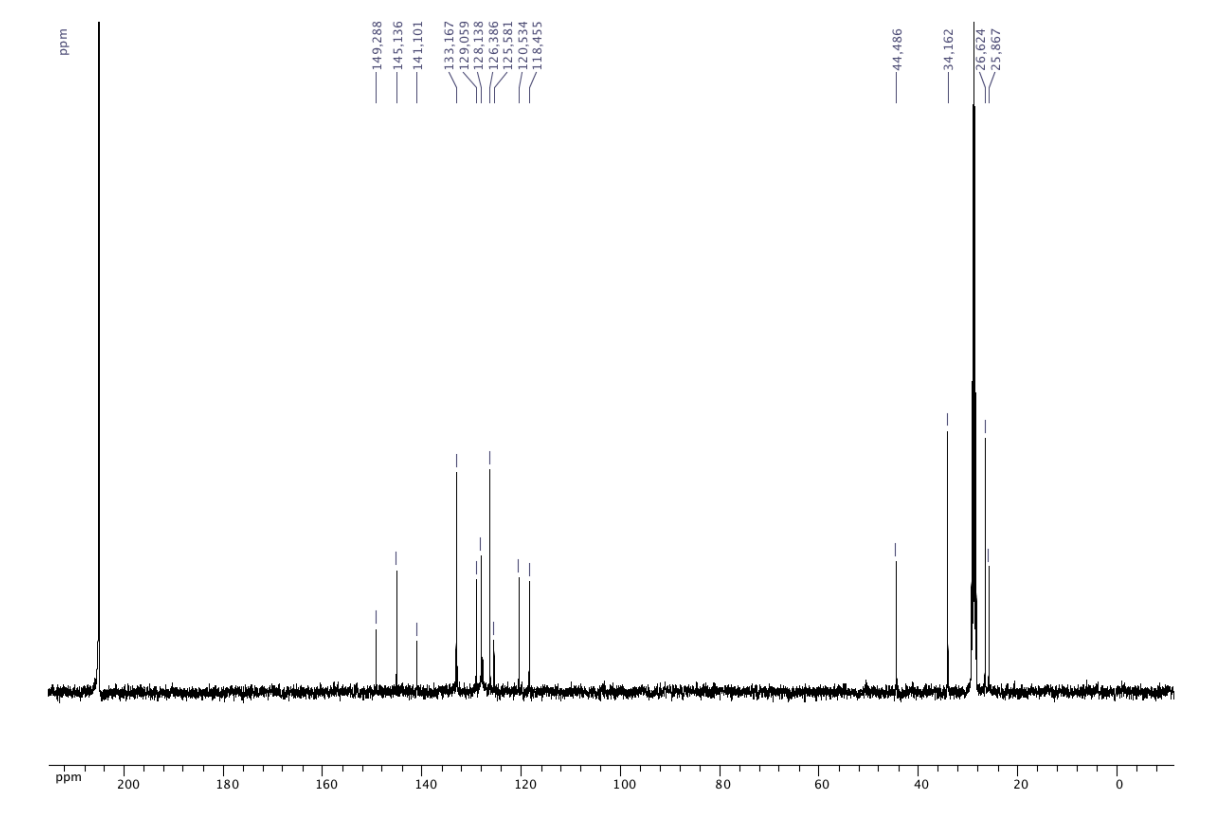

<sup>13</sup>C {<sup>1</sup>H} NMR (CDCl<sub>3</sub>, 125.8 MHz) of 2-(4-cyclohexylphenyl)-2,1-borazanaphthalene (**2a**)

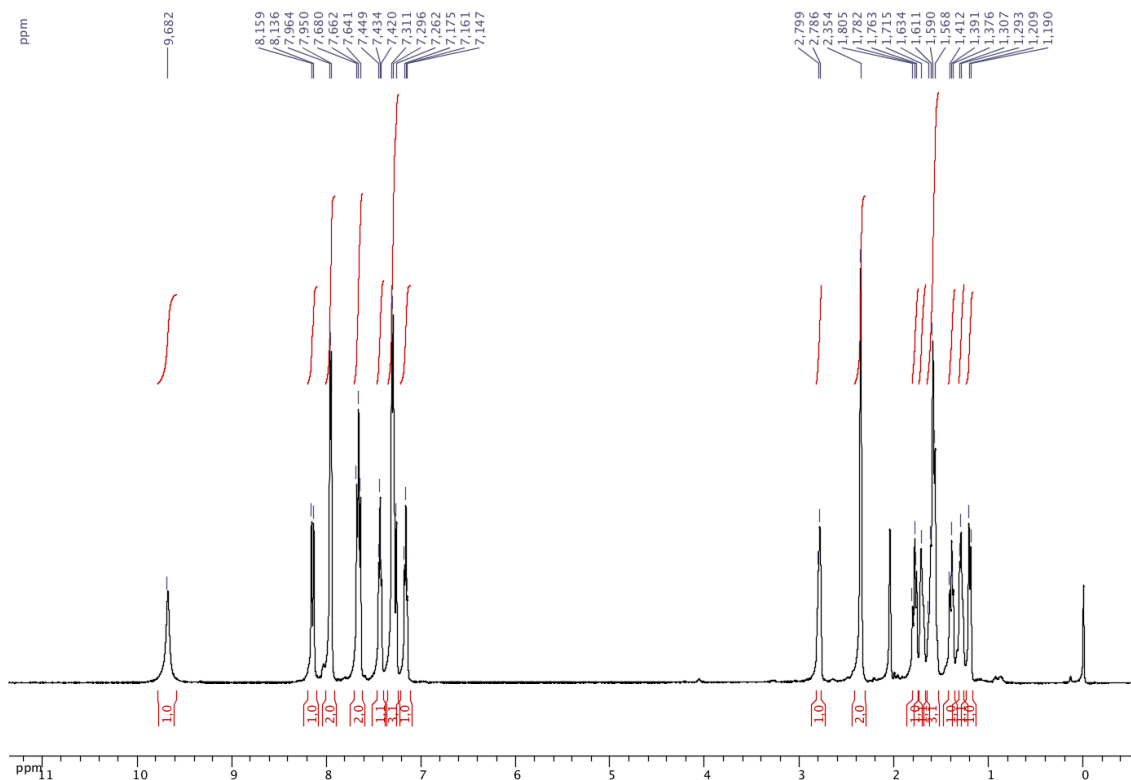

$^1\text{H}$  NMR (acetone- $d_6$ , 500.4 MHz) of 2-(4-(*exo*-bicyclo[2.2.1]heptan-2-yl)phenyl)-2,1-borazanaphthalene (**2b**)

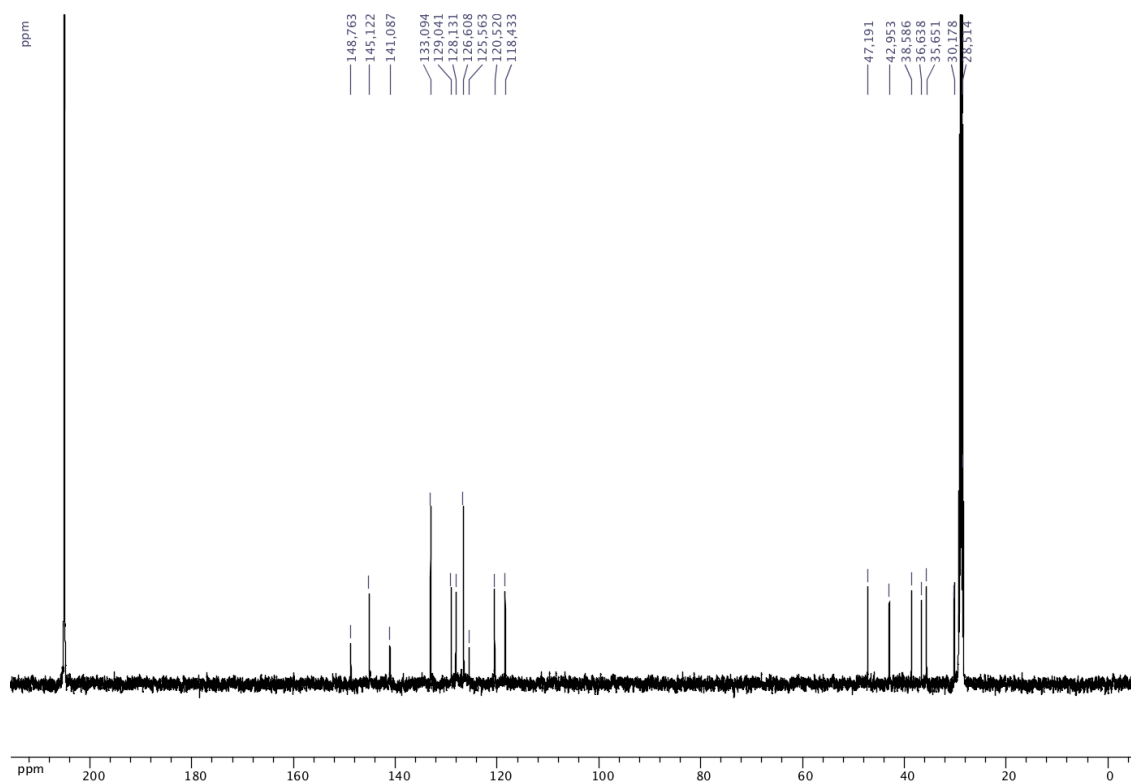

$^{13}\text{C}$   $\{^1\text{H}\}$  NMR (acetone- $d_6$ , 125.8 MHz) of 2-(4-(*exo*-bicyclo[2.2.1]heptan-2-yl)phenyl)-2,1-borazanaphthalene (**2b**)





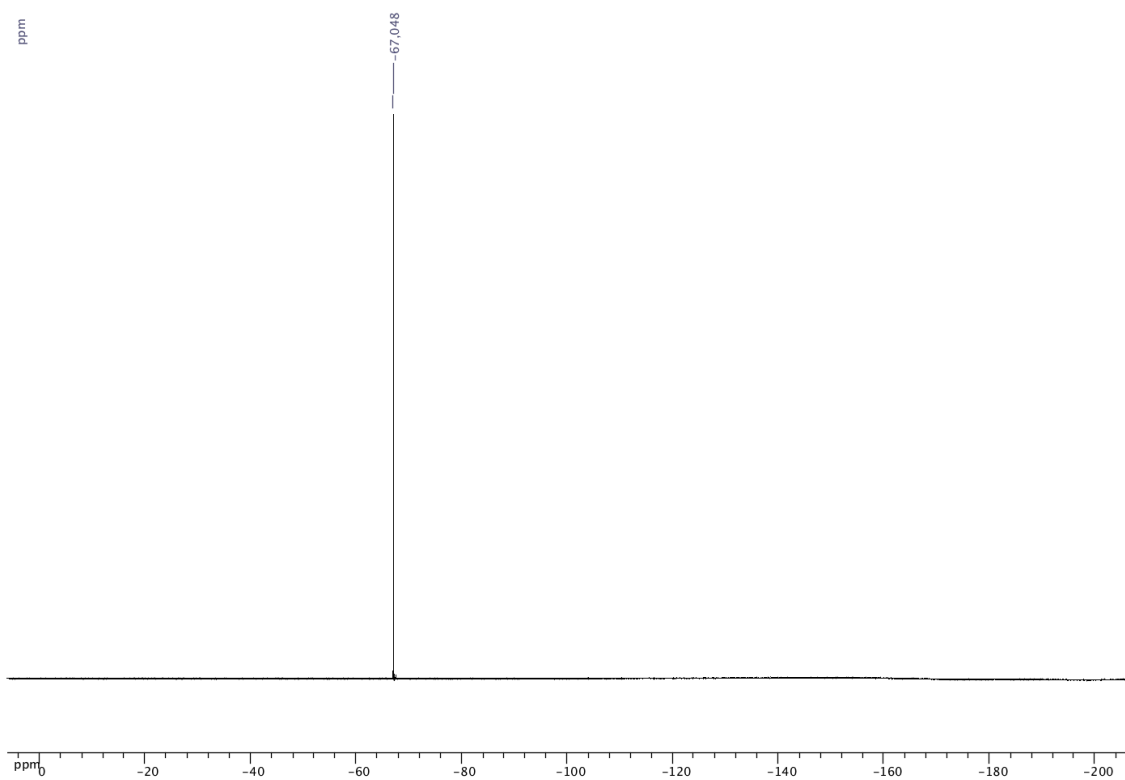

$^{19}\text{F}$   $\{^1\text{H}\}$  NMR (acetone- $d_6$ , 470.8 MHz) of 2-(4-(3,3,3-trifluoropropyl)phenyl)-2,1-borazanaphthalene (**2c**)

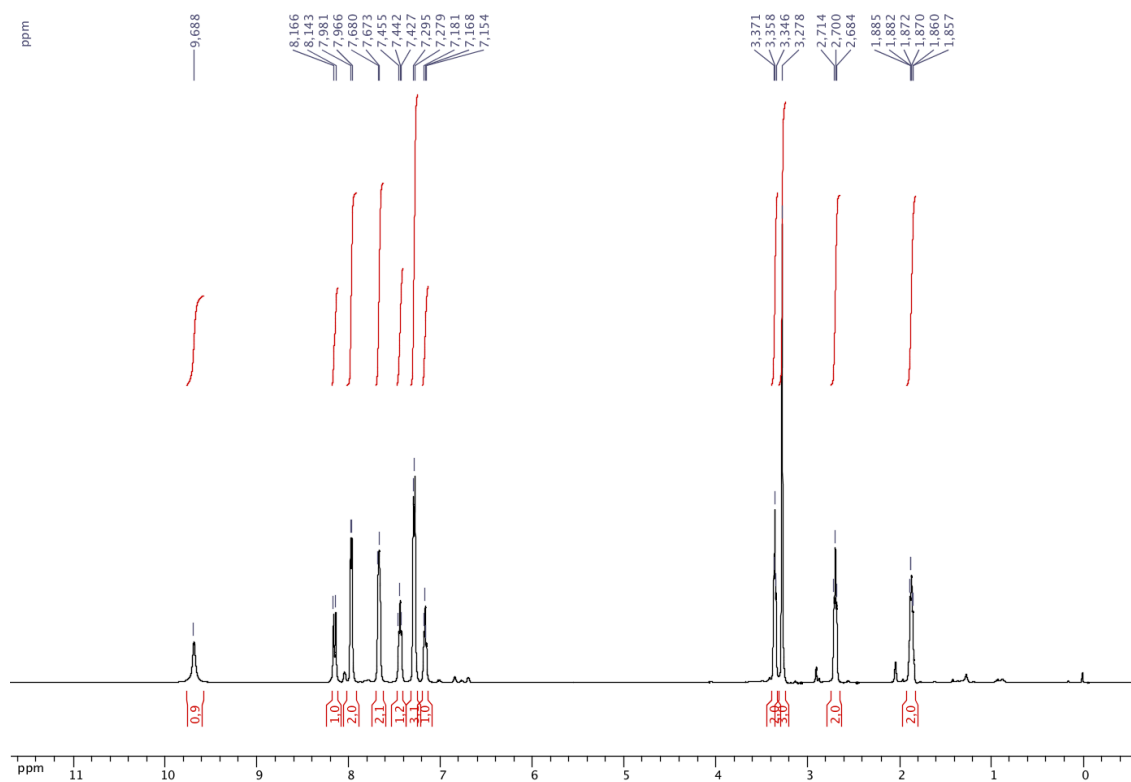

$^1\text{H}$  NMR (acetone- $d_6$ , 500.4 MHz) of 2-(4-(3-methoxypropyl)phenyl)-2,1-borazanaphthalene (**2d**)

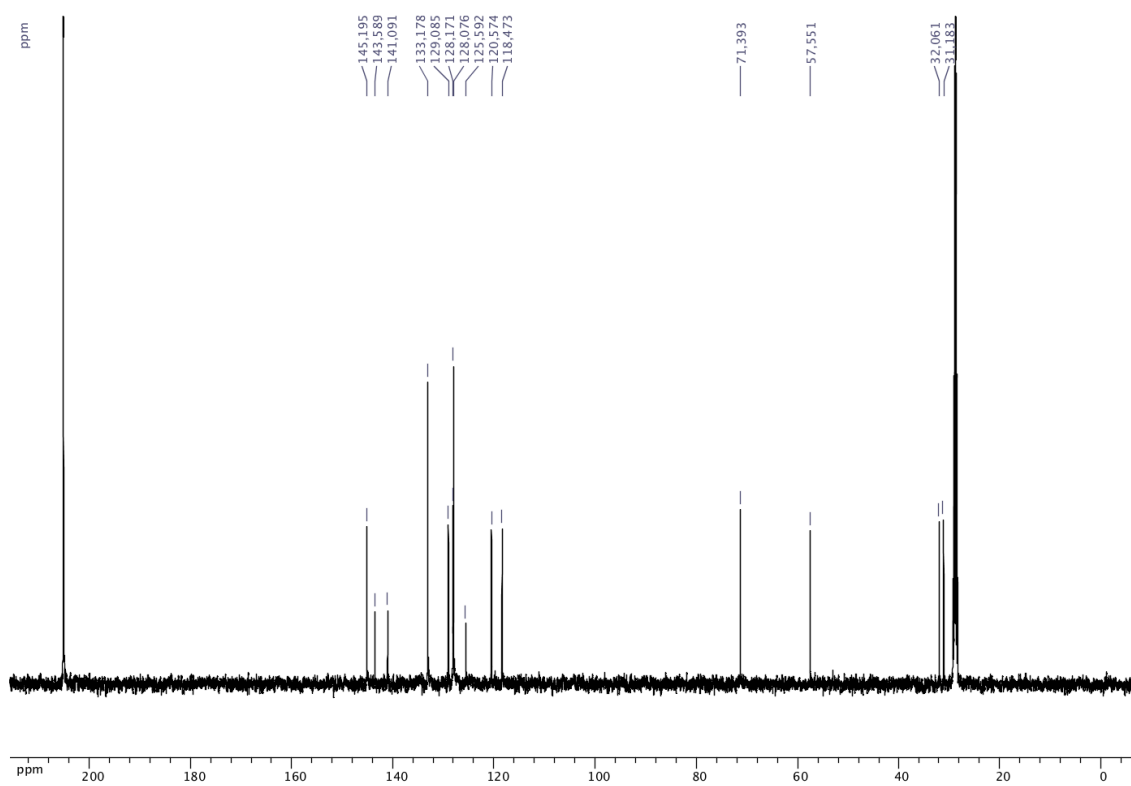

$^{13}\text{C}$  { $^1\text{H}$ } (acetone- $d_6$ , 125.8 MHz) of 2-(4-(3-methoxypropyl)phenyl)-2,1-borazanaphthalene (**2d**)

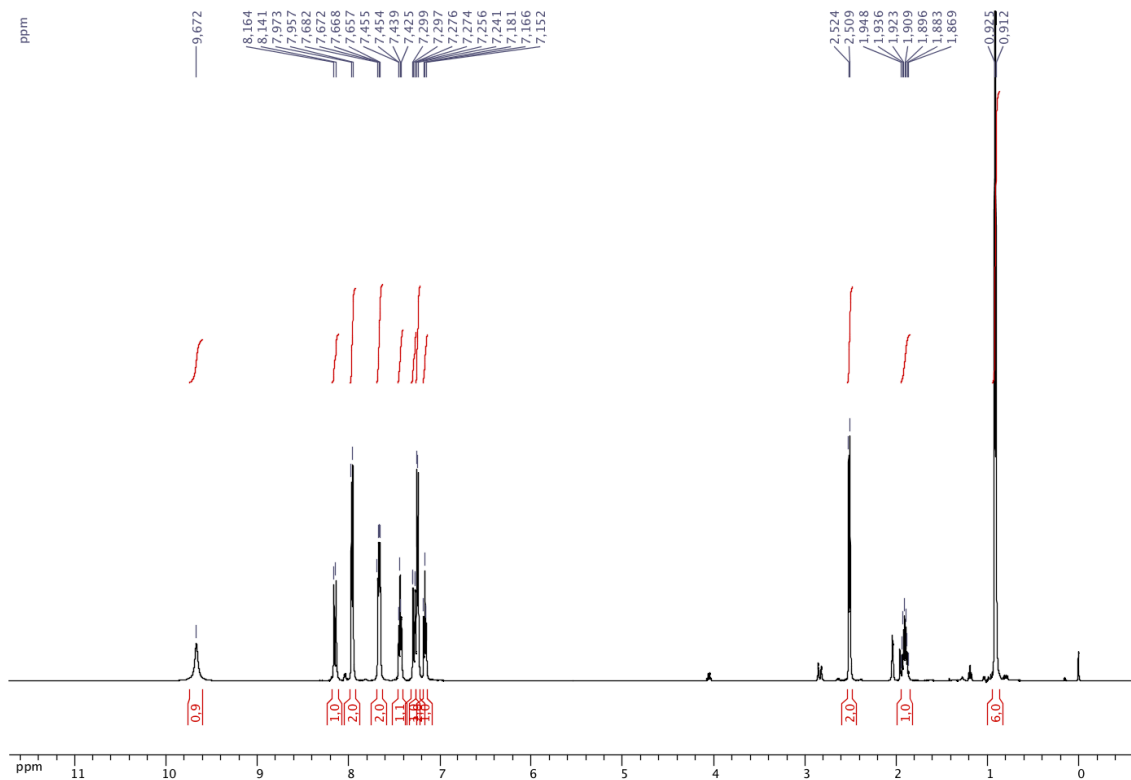

$^1\text{H}$  NMR (acetone- $d_6$ , 500.4 MHz) of 2-(4-isobutylphenyl)-2,1-borazanaphthalene (**2e**)

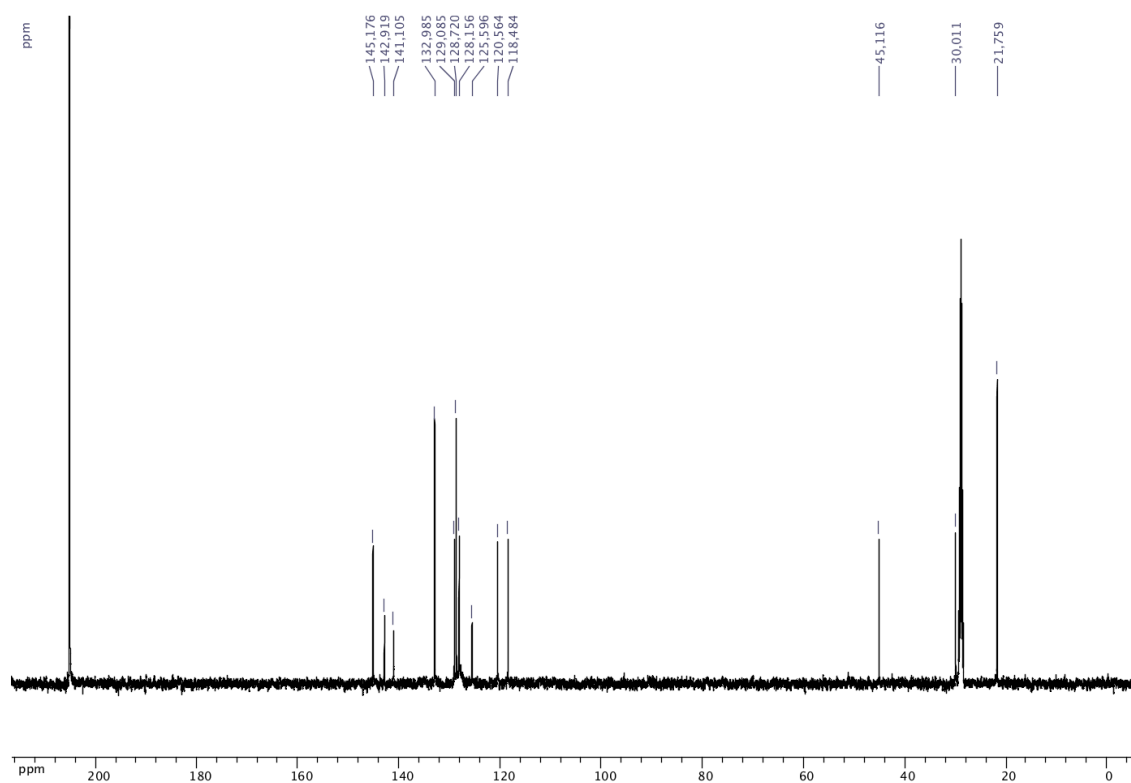

$^{13}\text{C}$   $\{^1\text{H}\}$  NMR (acetone- $d_6$ , 125.8 MHz) of 2-(4-isobutylphenyl)-2,1-borazanaphthalene (**2e**)

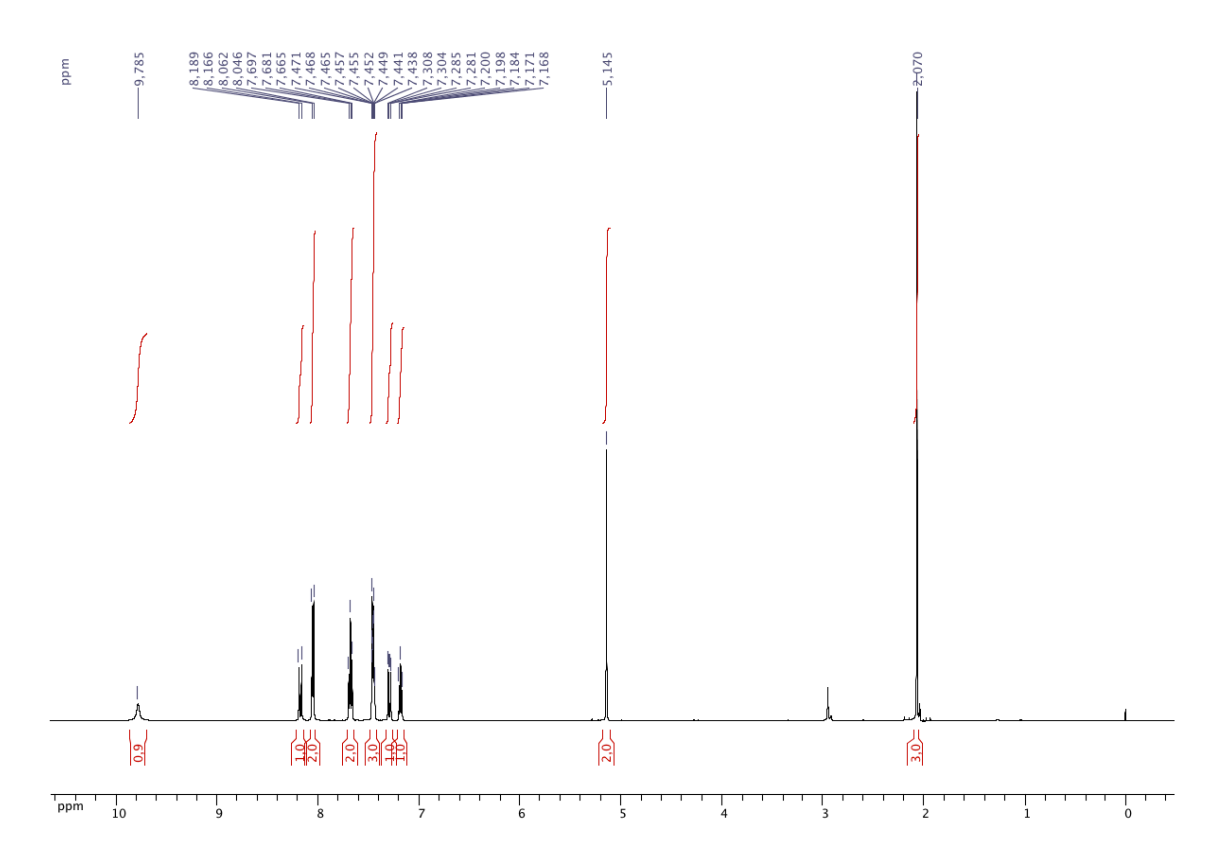

$^1\text{H}$  NMR (acetone- $d_6$ , 500.4 MHz) of 2-(4-(acetoxymethyl)phenyl)-2,1-borazanaphthalene (**2f**)

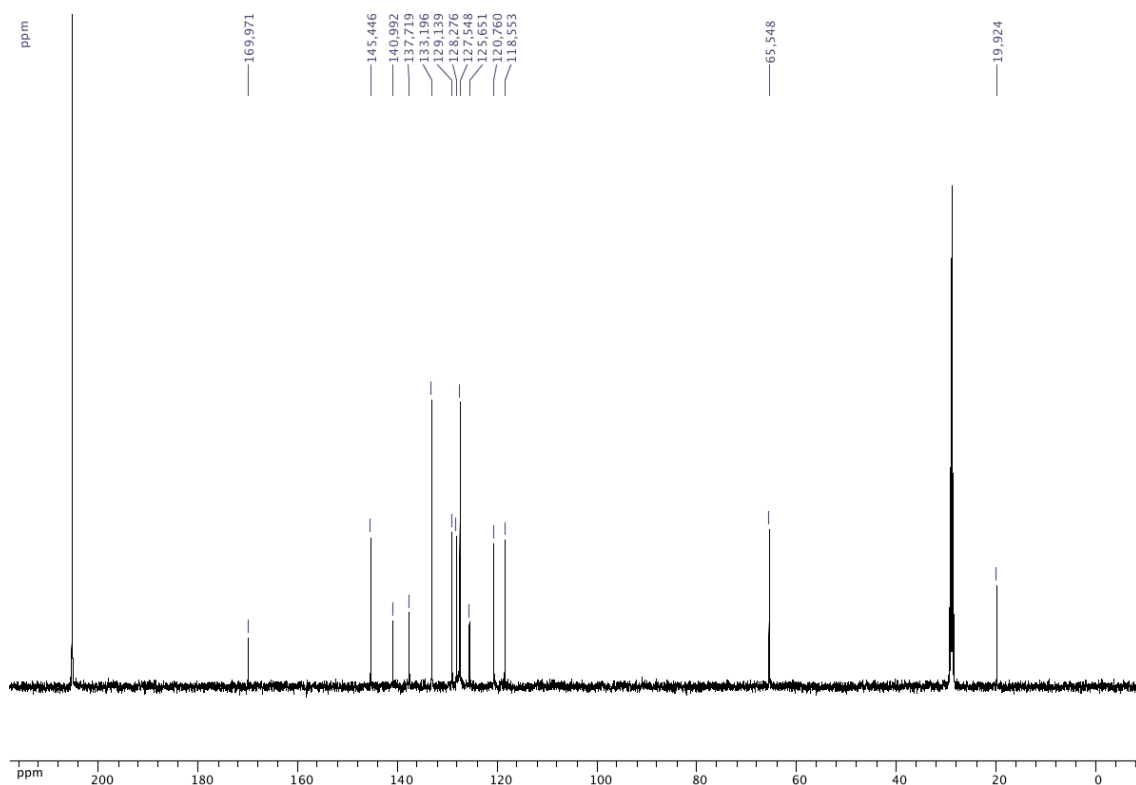

$^{13}\text{C}$   $\{^1\text{H}\}$  NMR (acetone- $d_6$ , 125.8 MHz) of 2-(4-(acetoxymethyl)phenyl)-2,1-borazanaphthalene (**2f**)

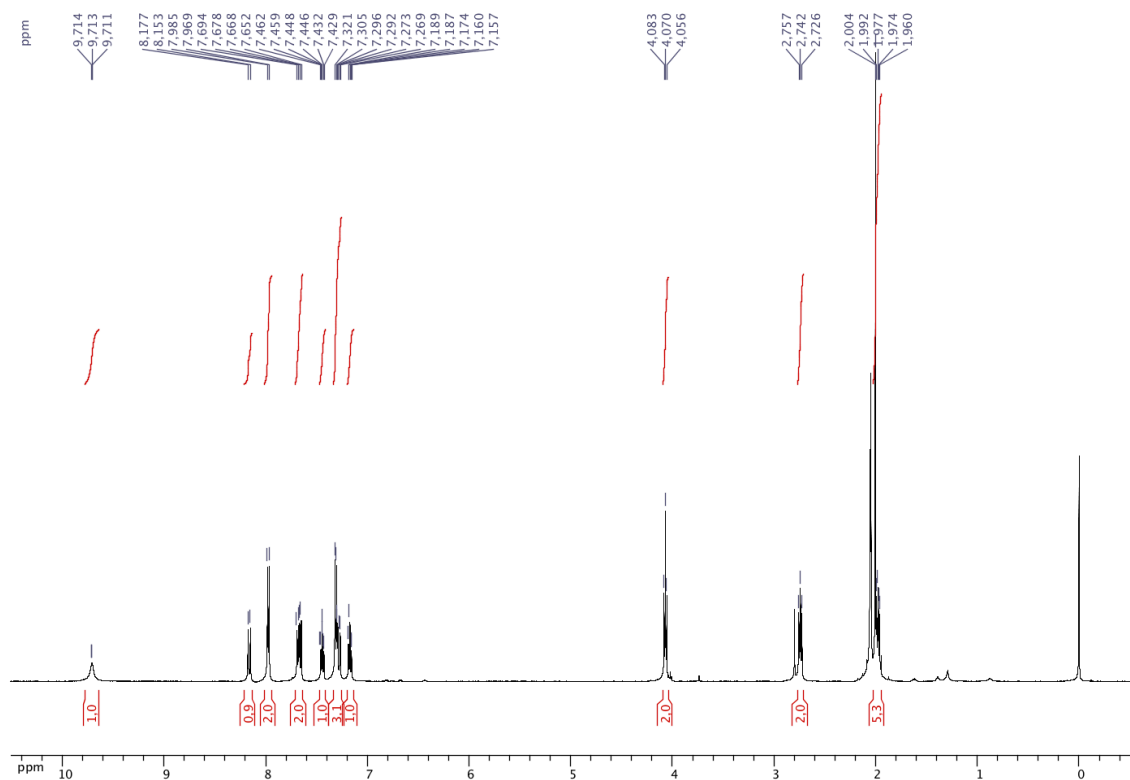

$^1\text{H}$  NMR (acetone- $d_6$ , 500.4 MHz) of 2-(4-(3-acetoxypropyl)phenyl)-2,1-borazanaphthalene (**2g**)

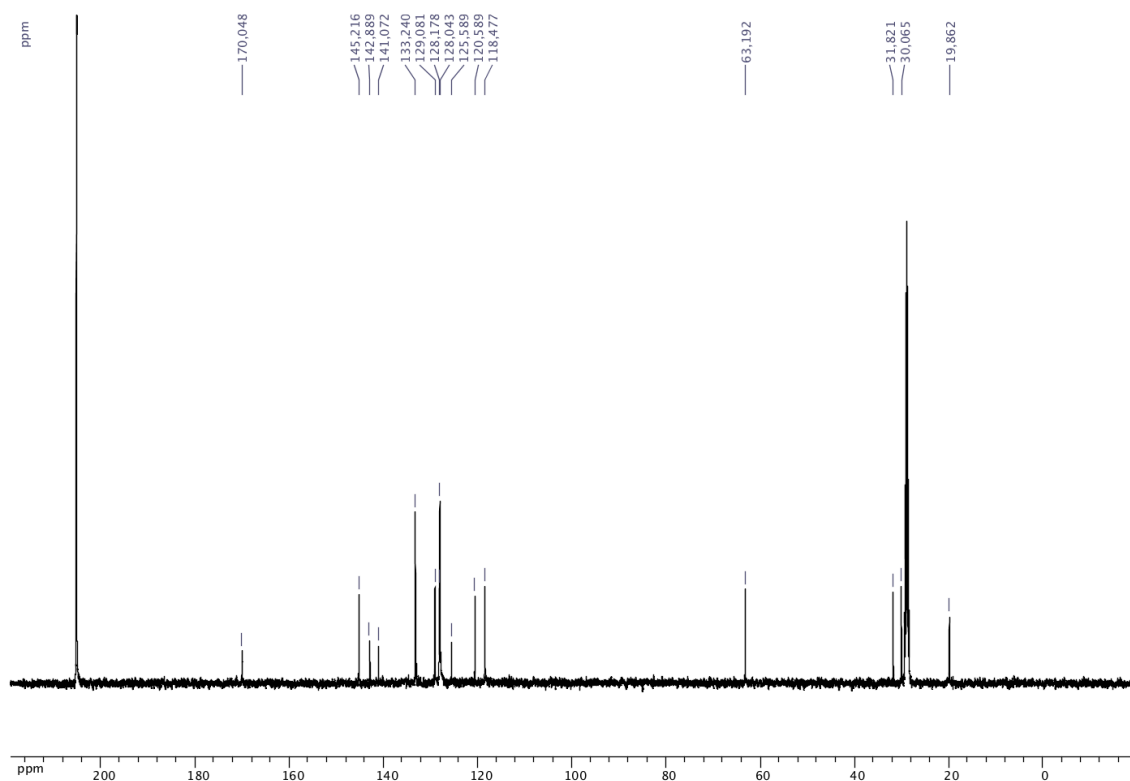

$^{13}\text{C}$   $\{^1\text{H}\}$  NMR (acetone- $d_6$ , 125.8 MHz) of 2-(4-(3-acetoxypropyl)phenyl)-2,1-borazanaphthalene (**2g**)

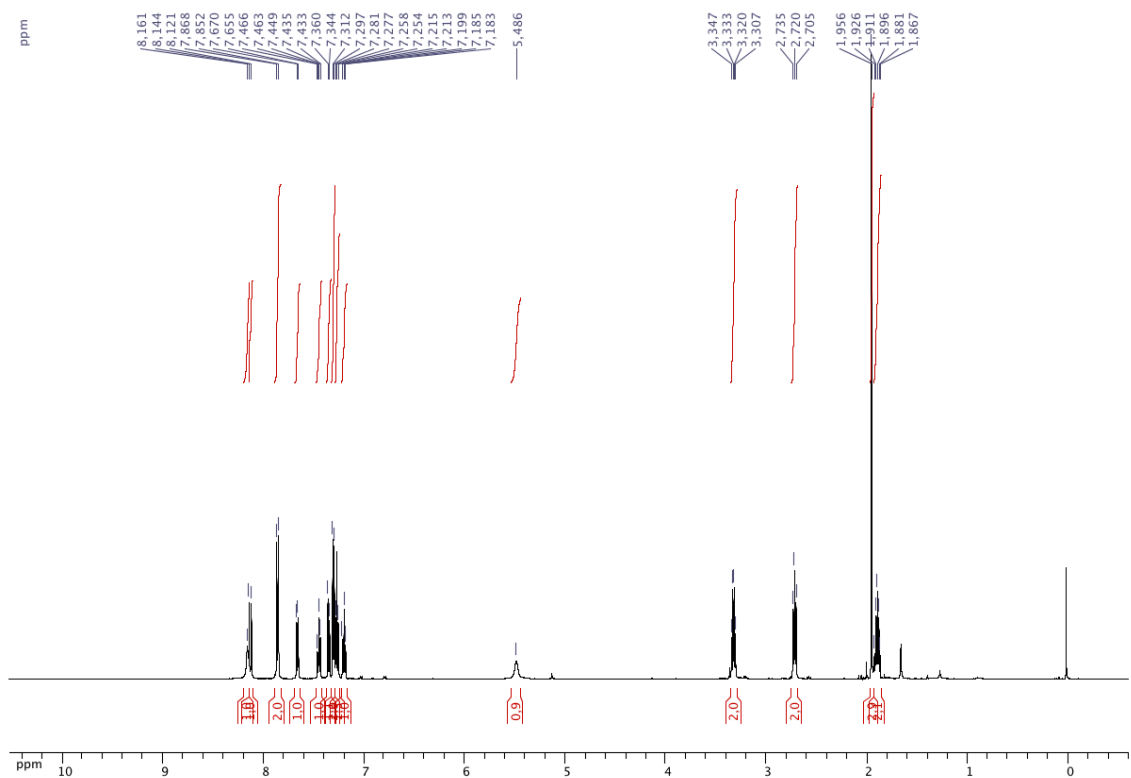

$^1\text{H}$  NMR ( $\text{CDCl}_3$ , 500.4 MHz) of 2-(4-(3-acetamidopropyl)phenyl)-2,1-borazanaphthalene (**2h**)

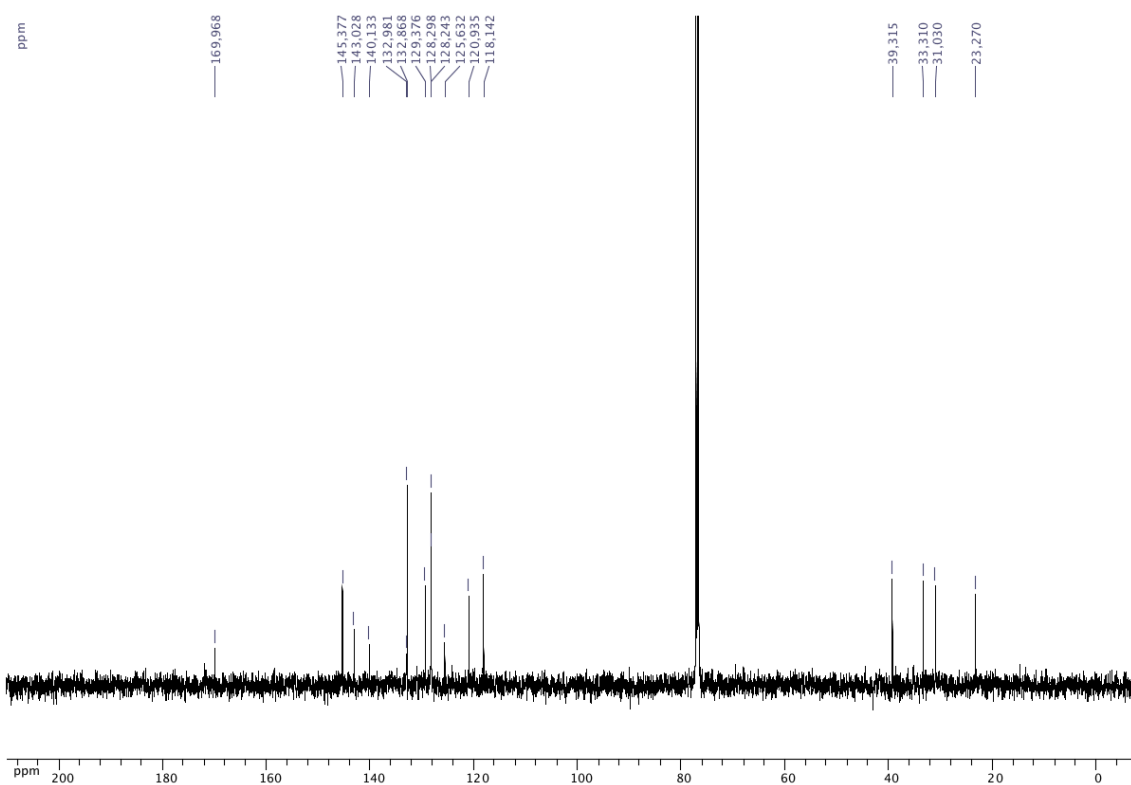

$^{13}\text{C}$   $\{^1\text{H}\}$  NMR ( $\text{CDCl}_3$ , 125.8 MHz) of 2-(4-(3-acetamidopropyl)phenyl)-2,1-borazanaphthalene (**2h**)

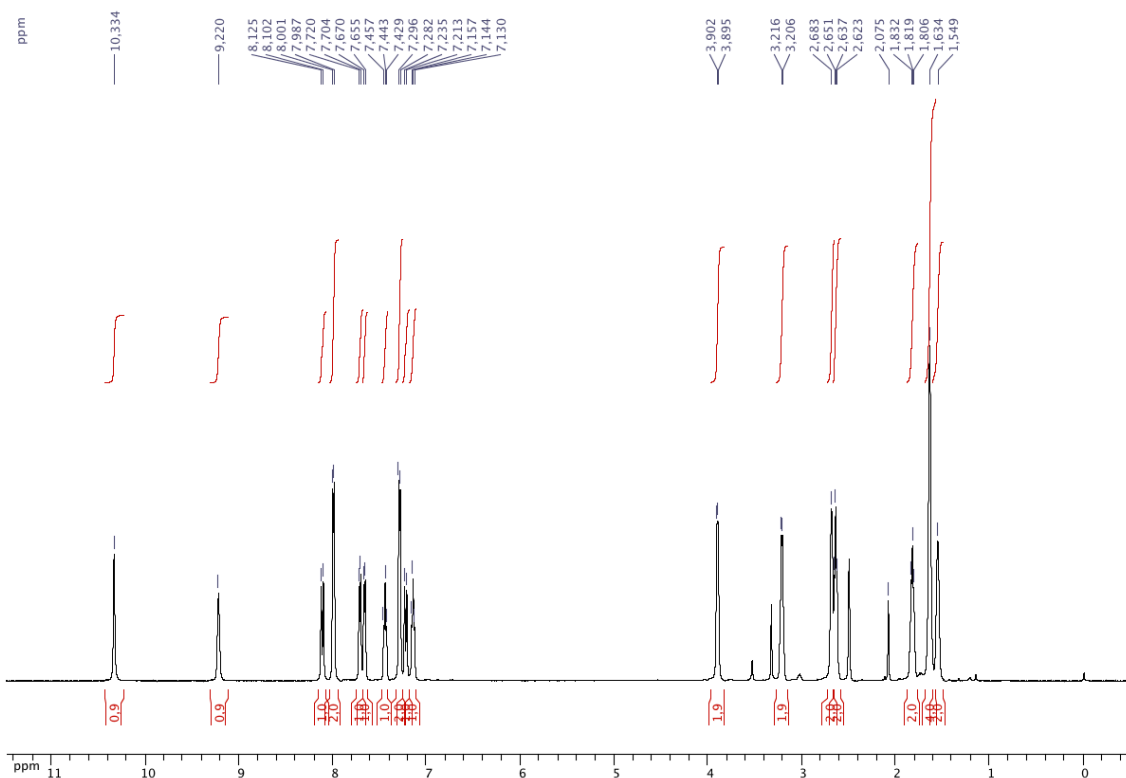

$^1\text{H}$  NMR (DMSO- $d_6$ , 500.4 MHz) 2-(4-(3-(2-oxoazepane-1-carboxamido)propyl)phenyl)-2,1-borazanaphthalene (**2i**)

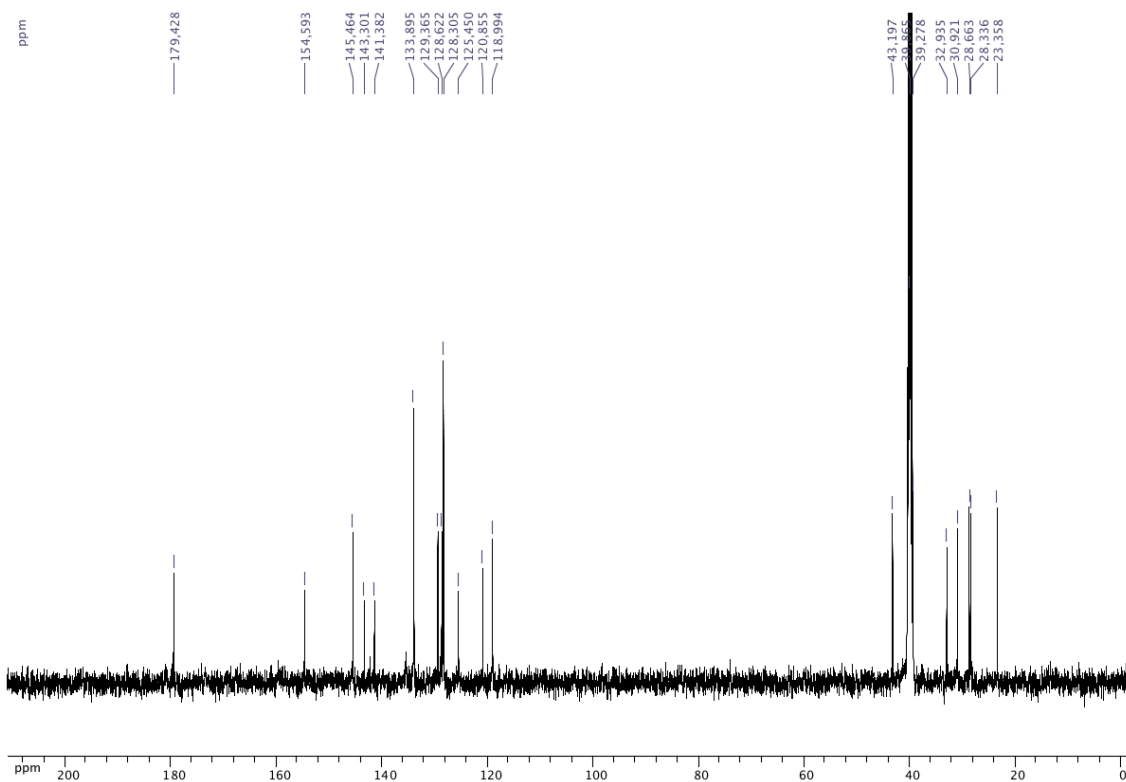

$^{13}\text{C}$   $\{^1\text{H}\}$  NMR (DMSO- $d_6$ , 125.8 MHz) 2-(4-(3-(2-oxoazepane-1-carboxamido)propyl)phenyl)-2,1-borazanaphthalene (**2i**)

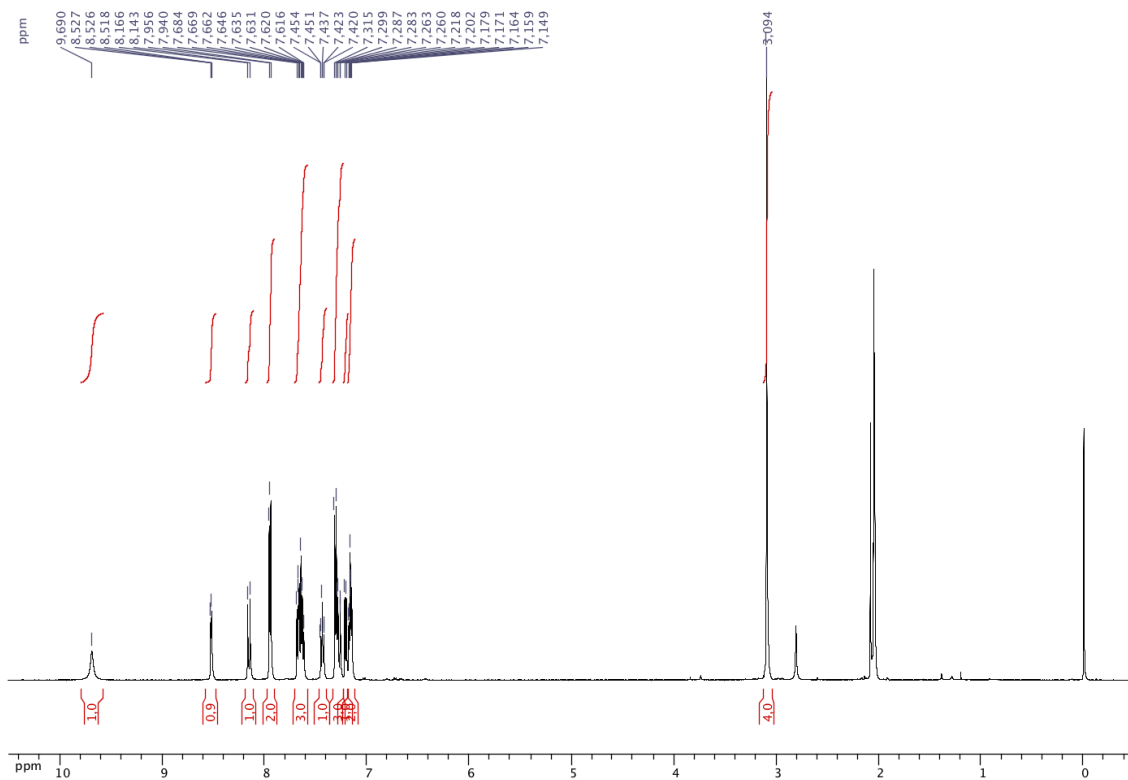

$^1\text{H}$  NMR (acetone- $d_6$ , 500.4 MHz) of 2-(4-(2-pyridin-2-yl)ethyl)phenyl)-2,1-borazanaphthalene (**2j**)

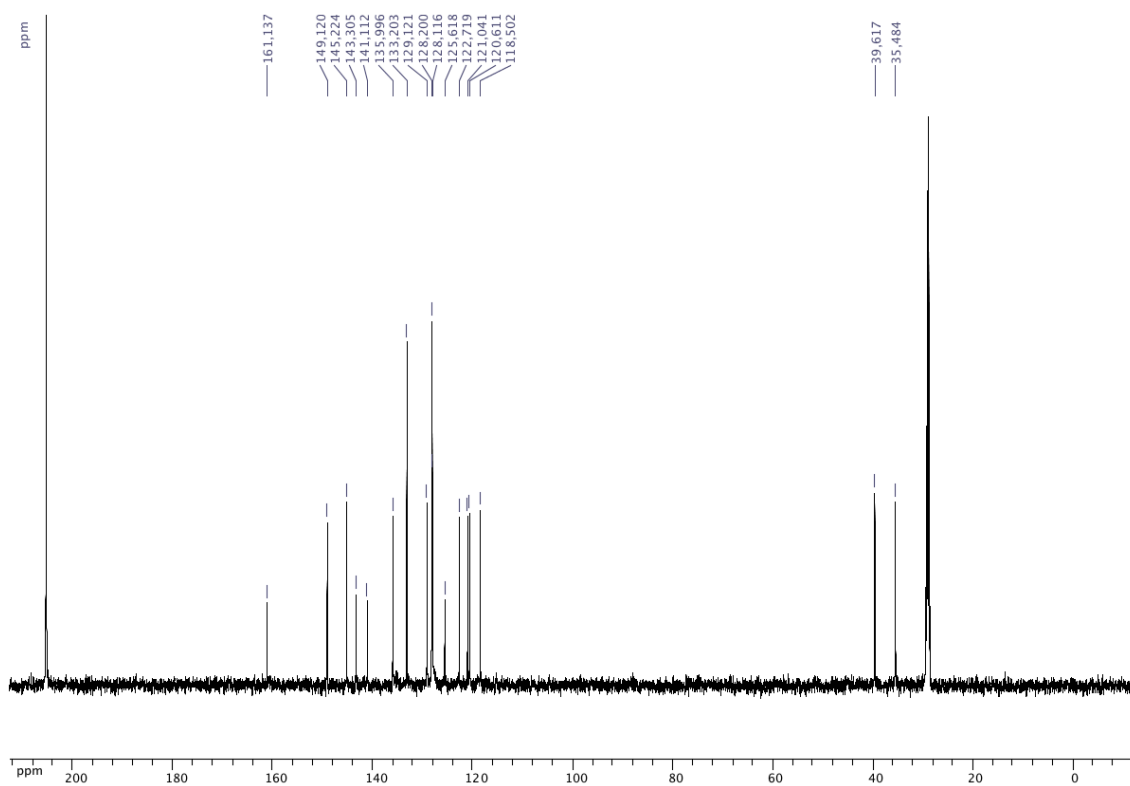

$^{13}\text{C}$   $\{^1\text{H}\}$  NMR (acetone- $d_6$ , 125.8 MHz) of 2-(4-(2-pyridin-2-yl)ethyl)phenyl)-2,1-borazanaphthalene (**2j**)



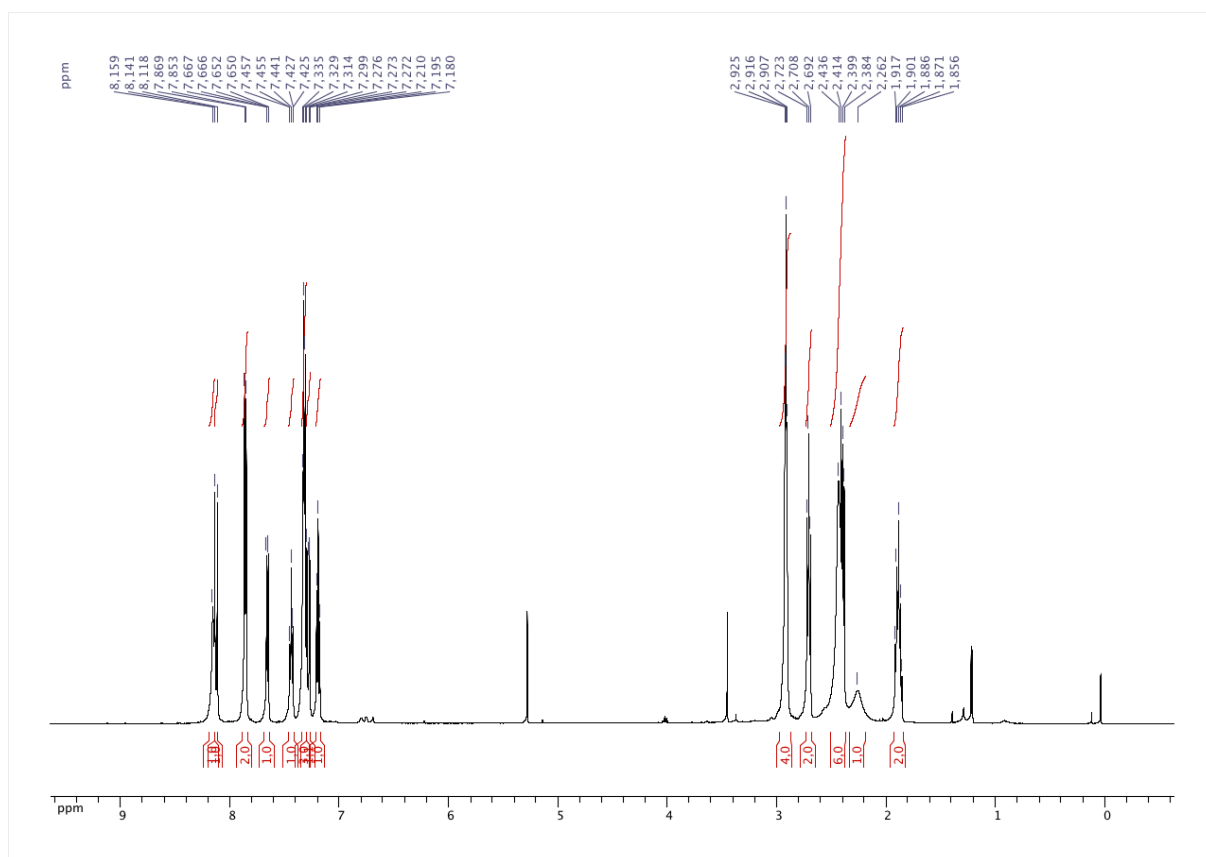

$^1\text{H}$  NMR (acetone- $d_6$ , 500.4 MHz) of 2-(4-(3-(piperazin-1-yl)propyl)phenyl)-2,1-borazanaphthalene (**2k**)

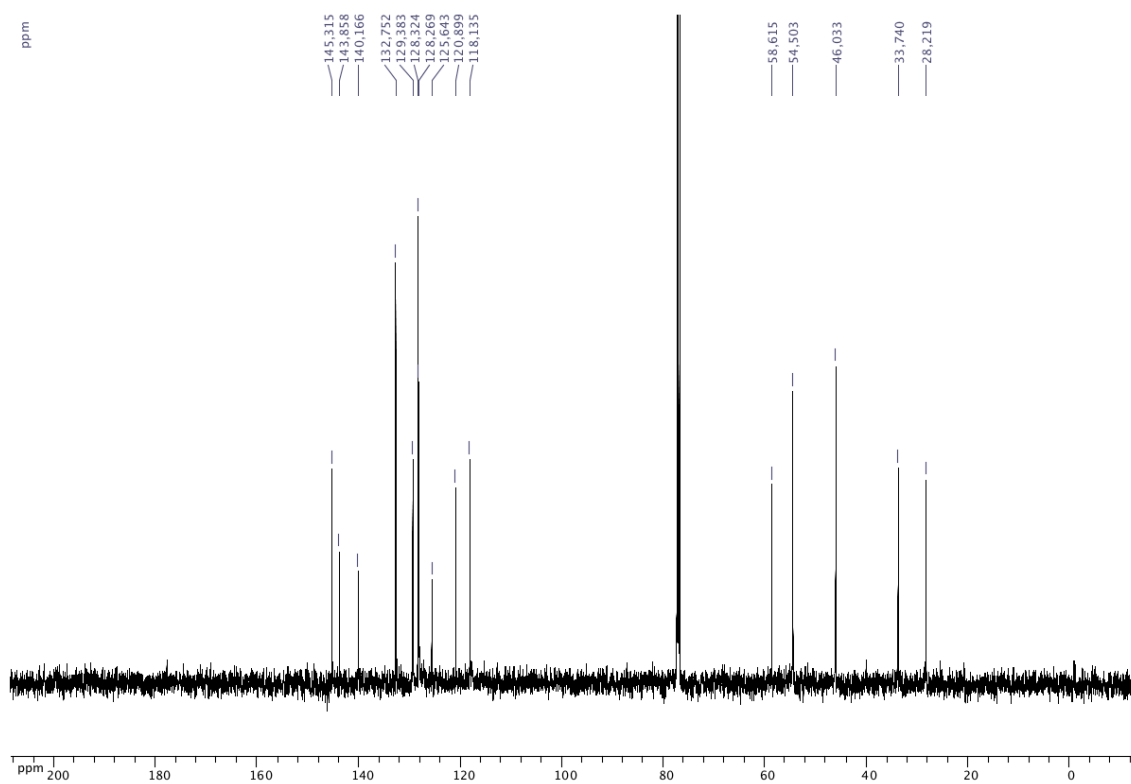

$^{13}\text{C}$   $\{^1\text{H}\}$  NMR (acetone- $d_6$ , 125.8 MHz) of 2-(4-(3-(piperazin-1-yl)propyl)phenyl)-2,1-borazanaphthalene (**2k**)

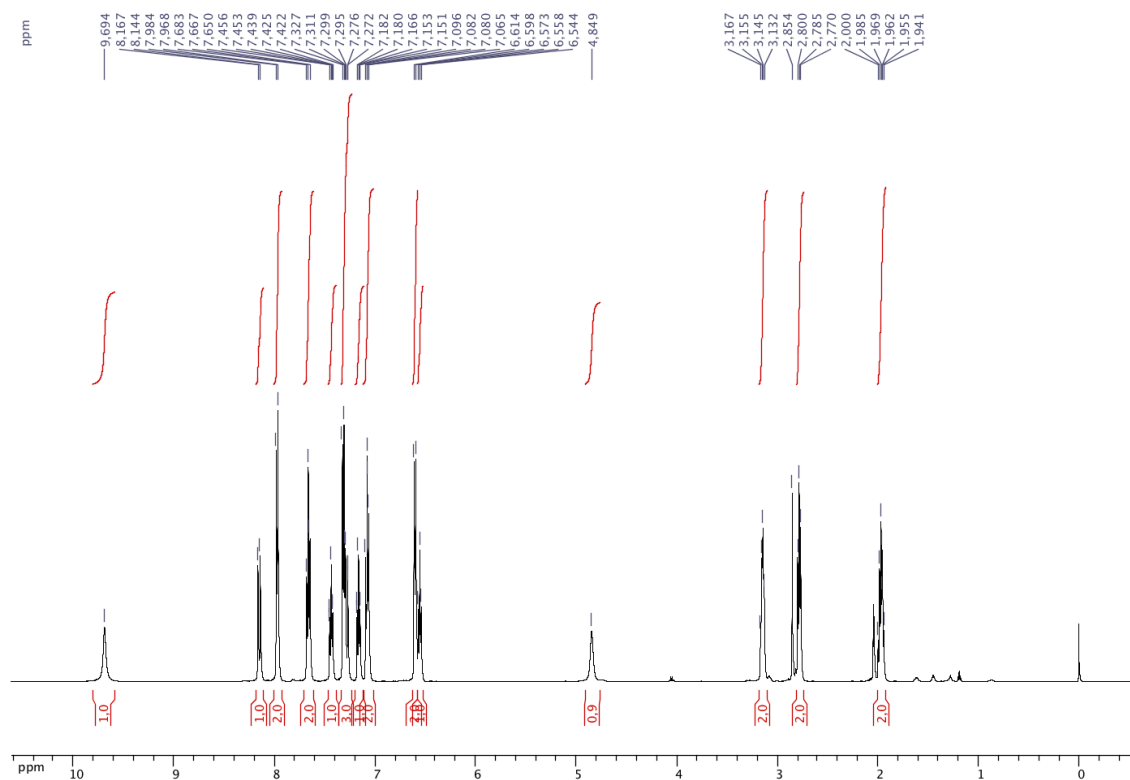

$^1\text{H}$  NMR (acetone- $d_6$ , 500.4 MHz) of 2-(4-(3-(phenylamino)propyl)phenyl)-2,1-borazanaphthalene (**21**)

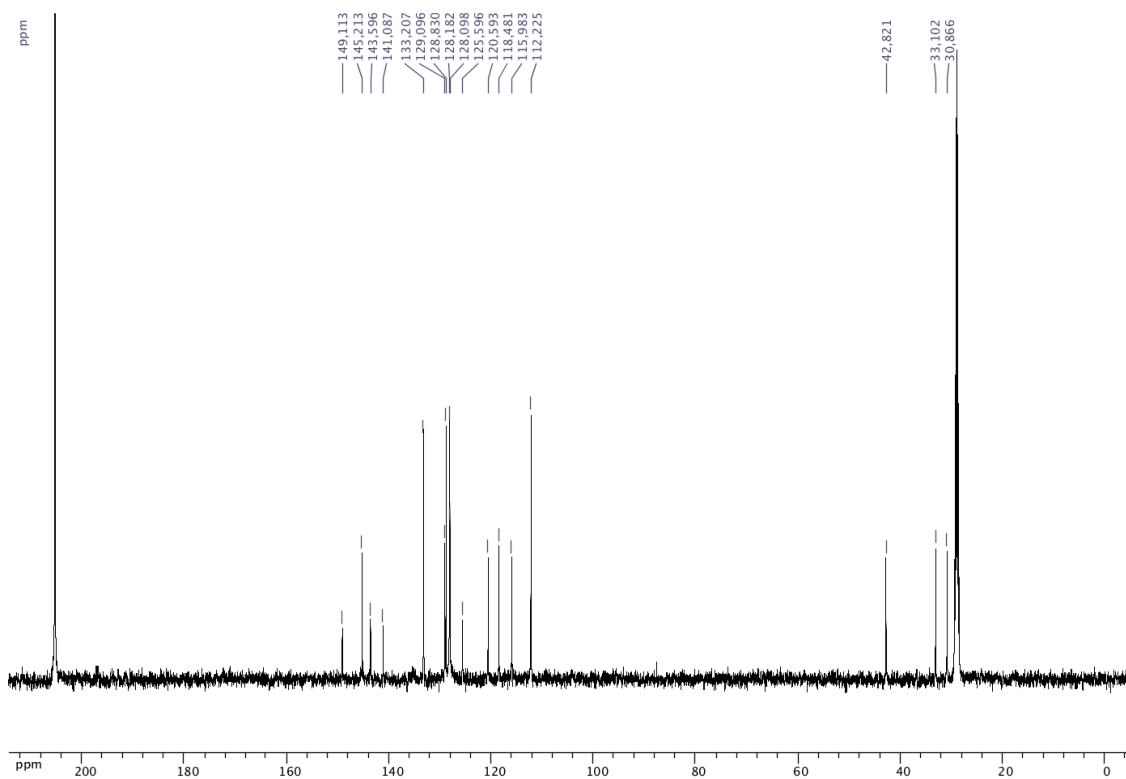

$^{13}\text{C}$   $\{^1\text{H}\}$  NMR (acetone- $d_6$ , 125.8 MHz) of 2-(4-(3-(phenylamino)propyl)phenyl)-2,1-borazanaphthalene (**21**)

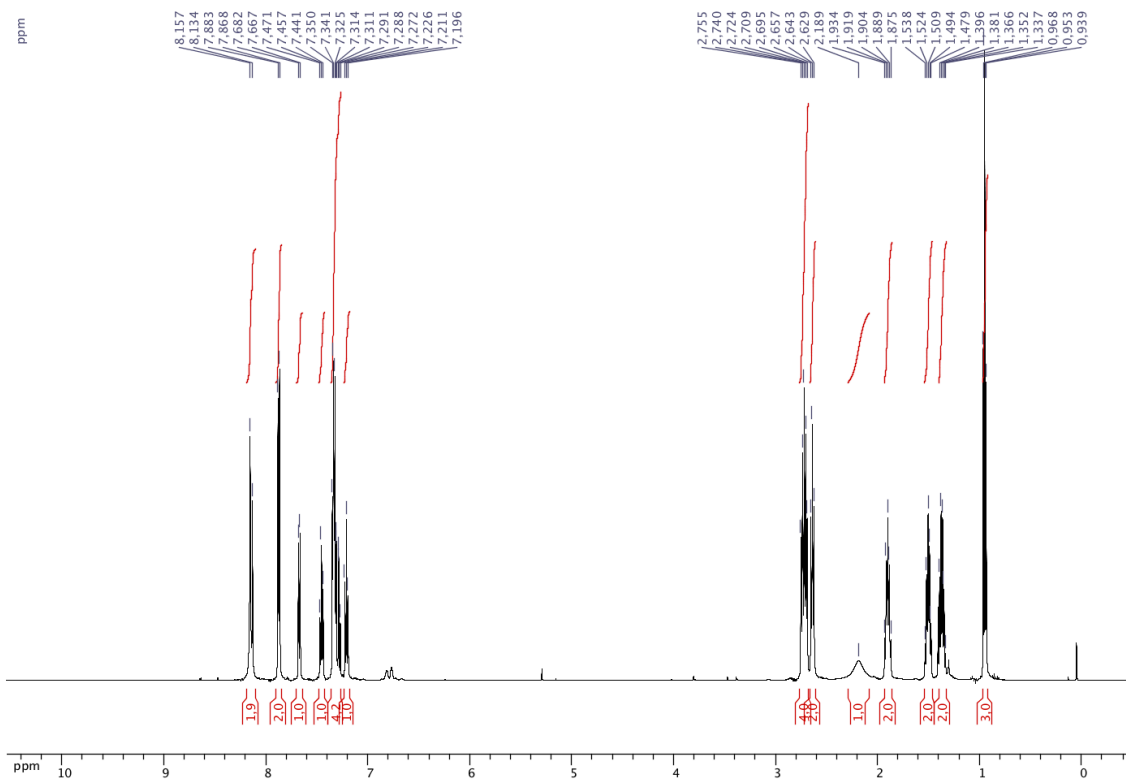

$^1\text{H}$  NMR ( $\text{CDCl}_3$ , 500.4 MHz) of 2-(4-(3-(butylamino)propyl)phenyl)-2,1-borazanaphthalene (**2m**)

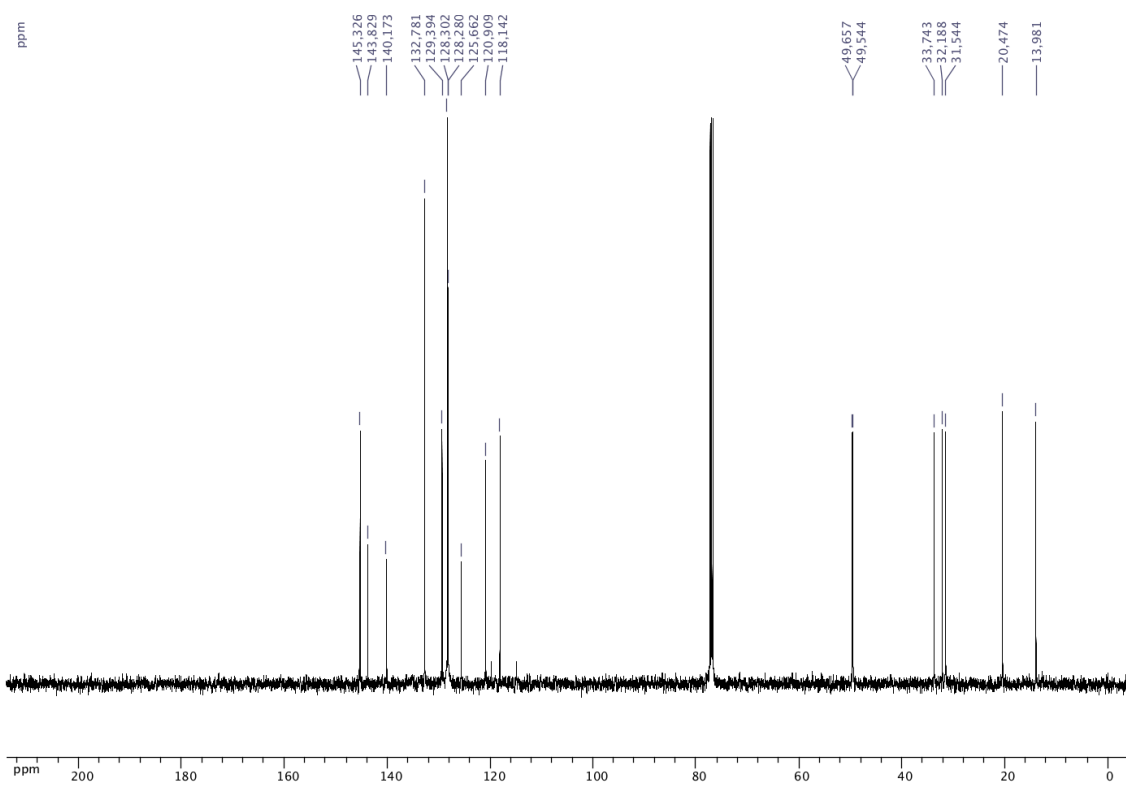

$^{13}\text{C}$   $\{^1\text{H}\}$  NMR ( $\text{CDCl}_3$ , 125.8 MHz) of 2-(4-(3-(butylamino)propyl)phenyl)-2,1-borazanaphthalene (**2m**)

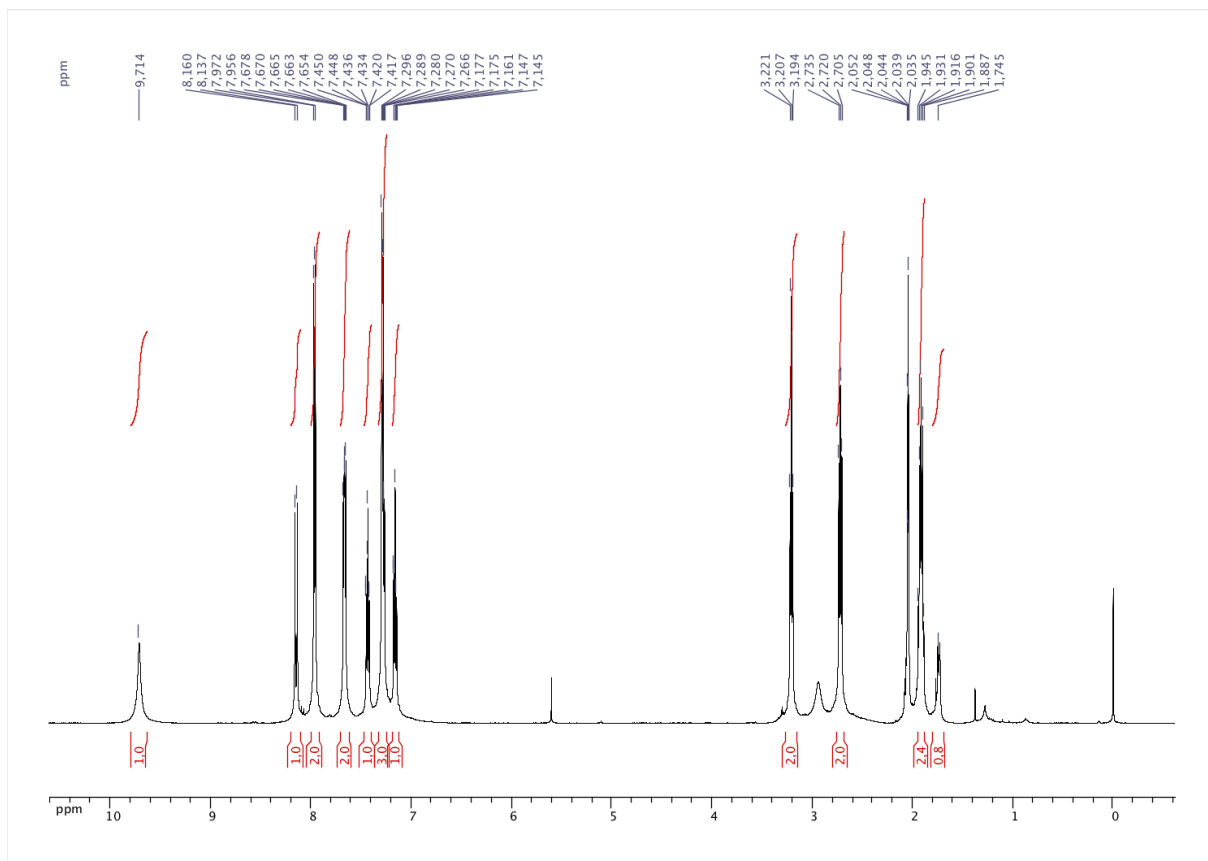

$^1\text{H}$  NMR (acetone- $d_6$ , 500.4 MHz) of 2-(4-(3-aminopropyl)phenyl)-2,1-borazanaphthalene (**2n**)

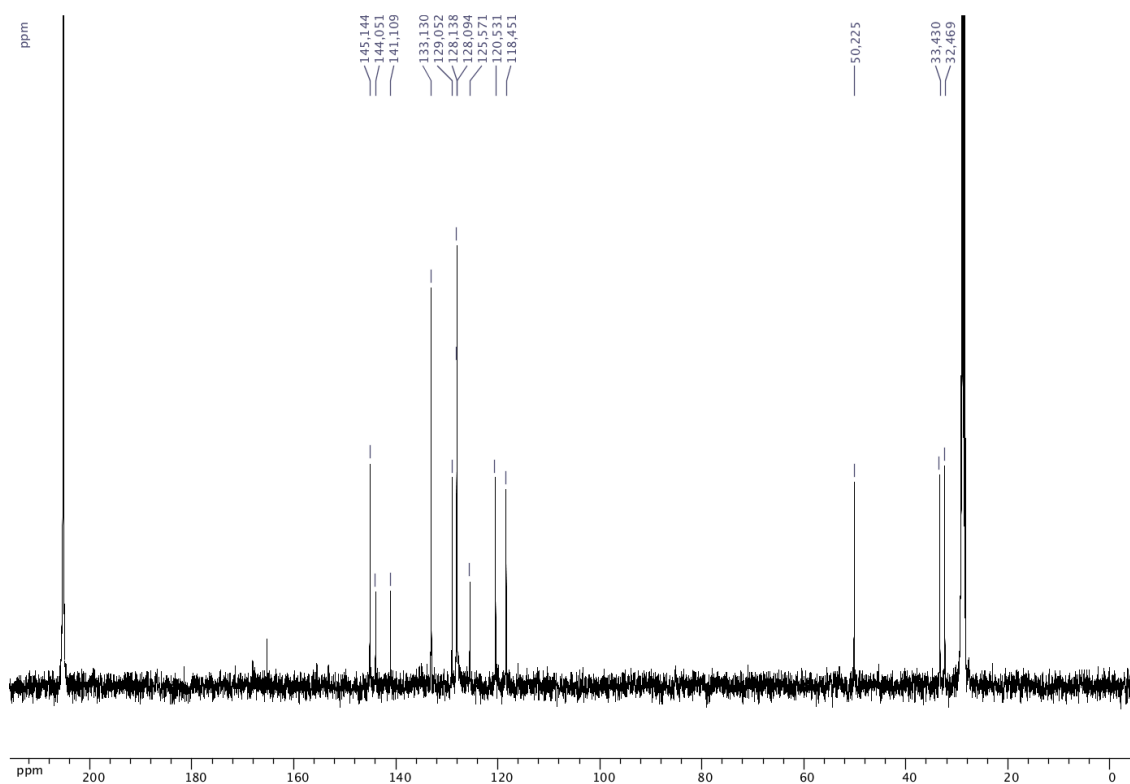

$^{13}\text{C}$   $\{^1\text{H}\}$  NMR (acetone- $d_6$ , 125.8 MHz) of 2-(4-(3-aminopropyl)phenyl)-2,1-borazanaphthalene (**2n**)

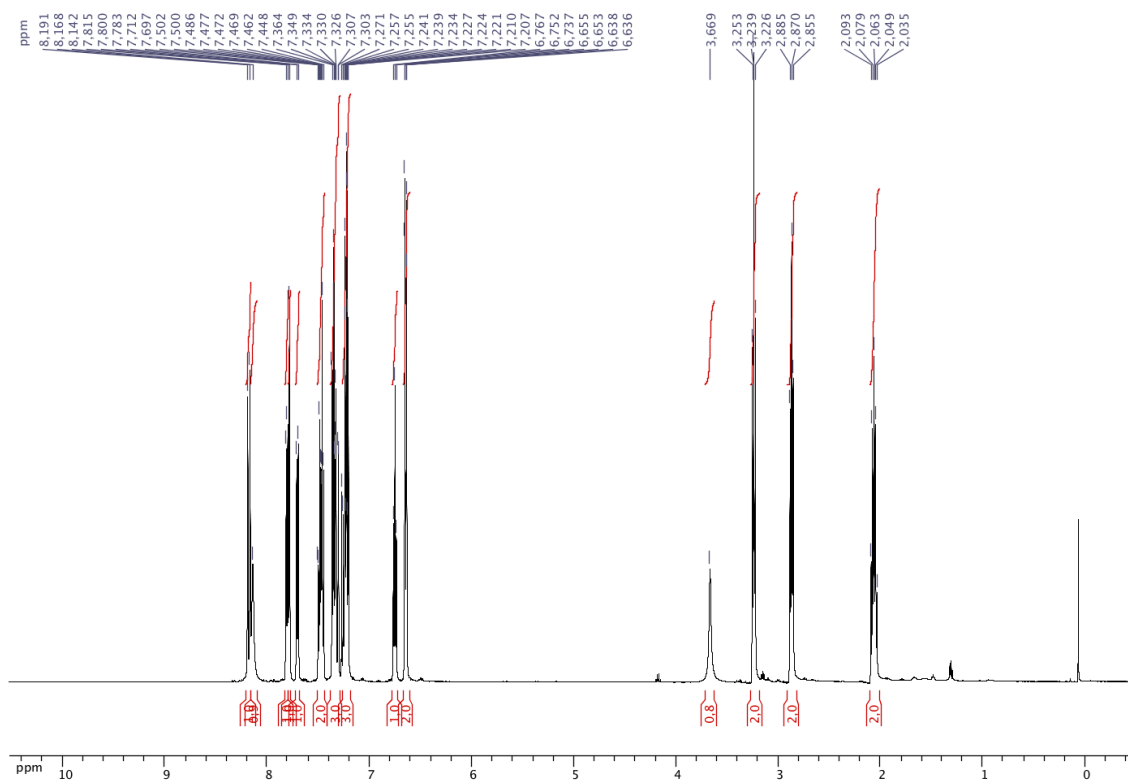

$^1\text{H}$  NMR ( $\text{CDCl}_3$ , 500.4 MHz) of 2-(3-(3-(phenylamino)propyl)phenyl)-2,1-borazanaphthalene (**3a**)

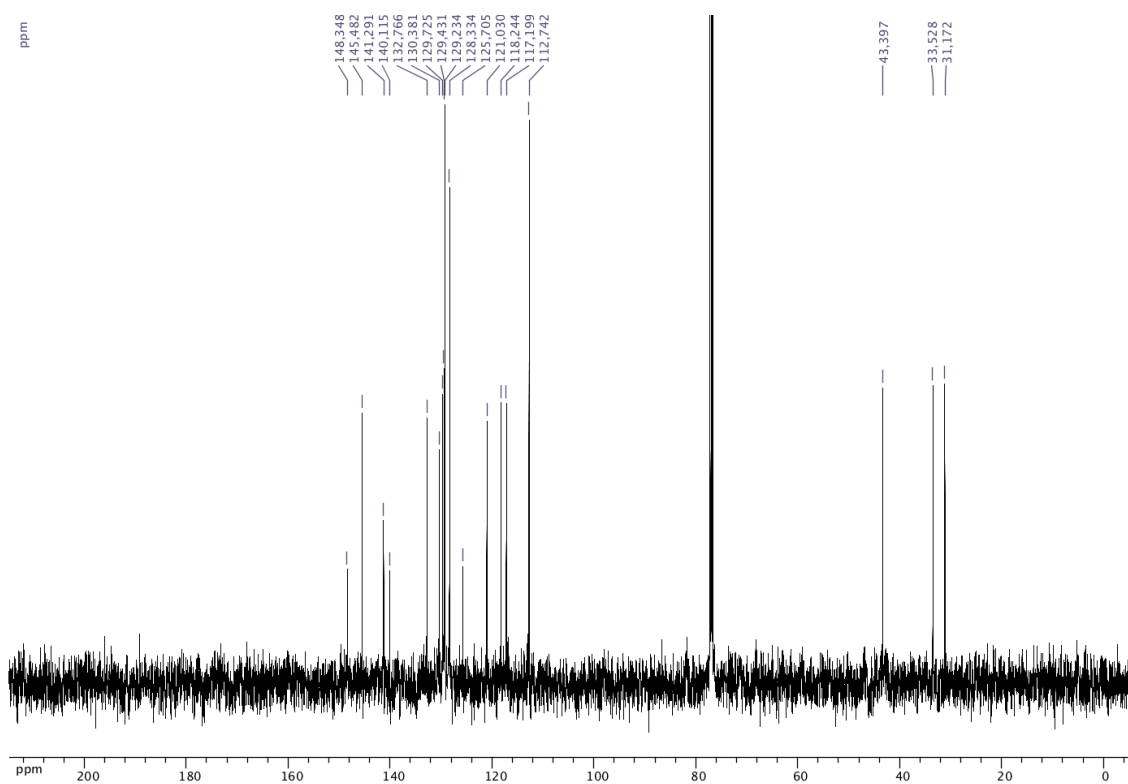

$^{13}\text{C}$   $\{^1\text{H}\}$  NMR ( $\text{CDCl}_3$ , 125.8 MHz) of 2-(3-(3-(phenylamino)propyl)phenyl)-2,1-borazanaphthalene (**3a**)

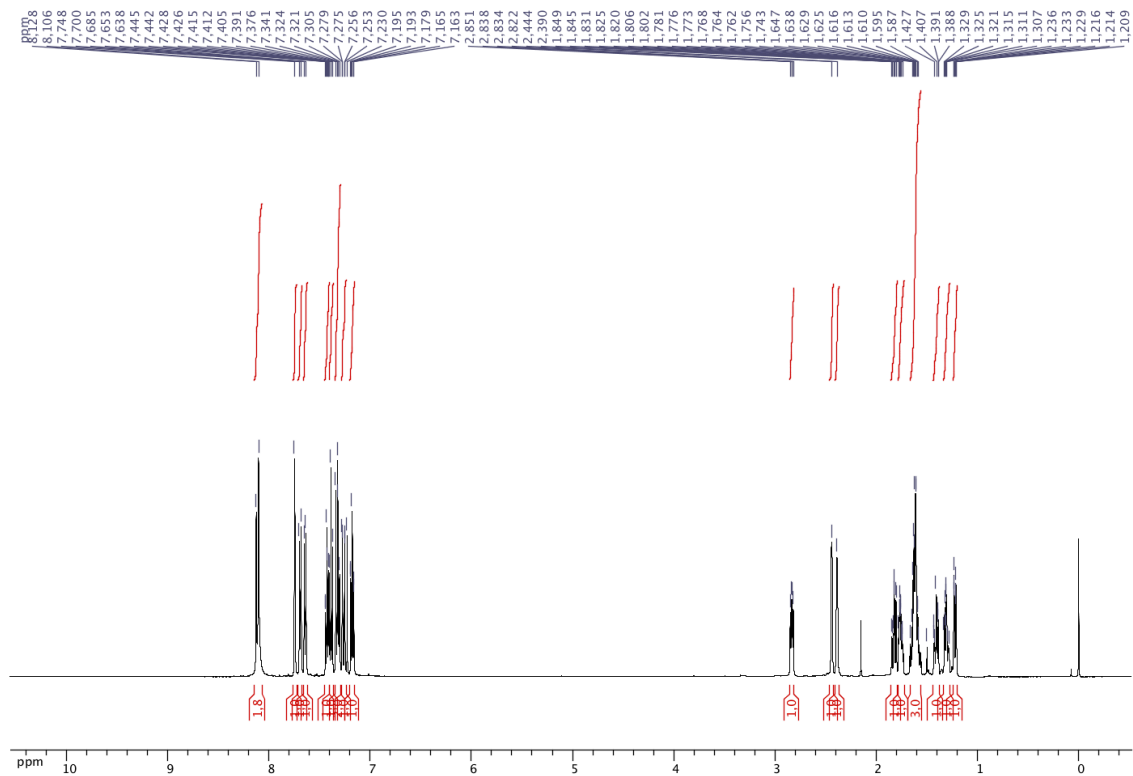

$^1\text{H}$  NMR ( $\text{CDCl}_3$ , 500.4 MHz) of 2-(3-(*exo*-bicyclo[2.2.1]heptan-2-yl)phenyl)-2,1-borazanaphthalene (**3b**)

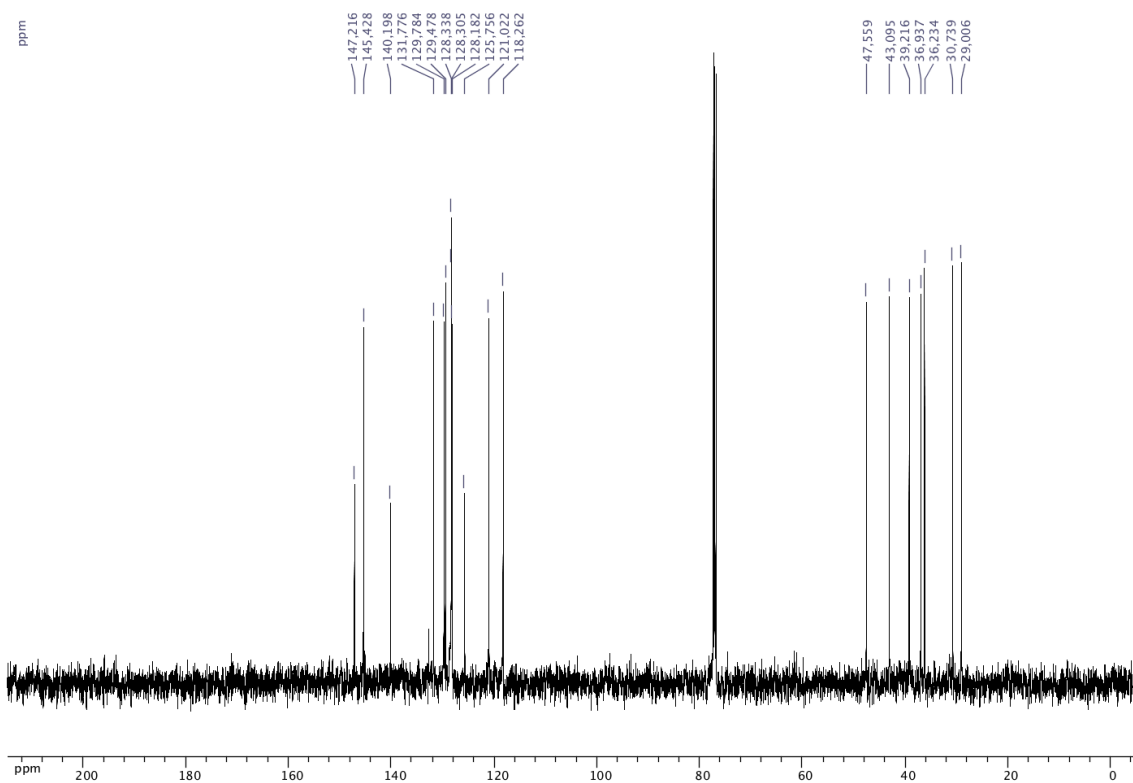

$^{13}\text{C}$   $\{^1\text{H}\}$  NMR ( $\text{CDCl}_3$ , 125.8 MHz) of 2-(3-(*exo*-bicyclo[2.2.1]heptan-2-yl)phenyl)-2,1-borazanaphthalene (**3b**)

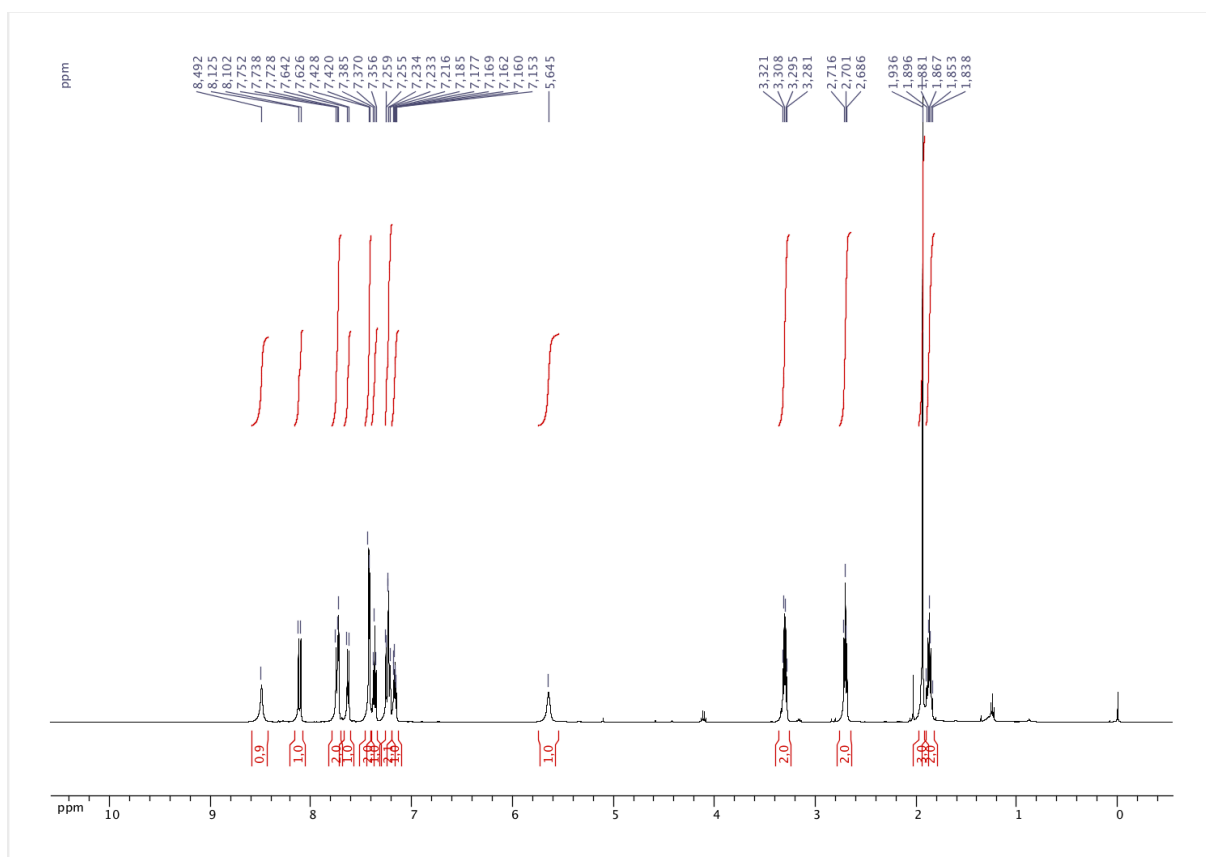

<sup>1</sup>H NMR (CDCl<sub>3</sub>, 500.4 MHz) of 2-(3-(3-acetamidopropyl)phenyl)-2,1-borazanaphthalene (**3c**)

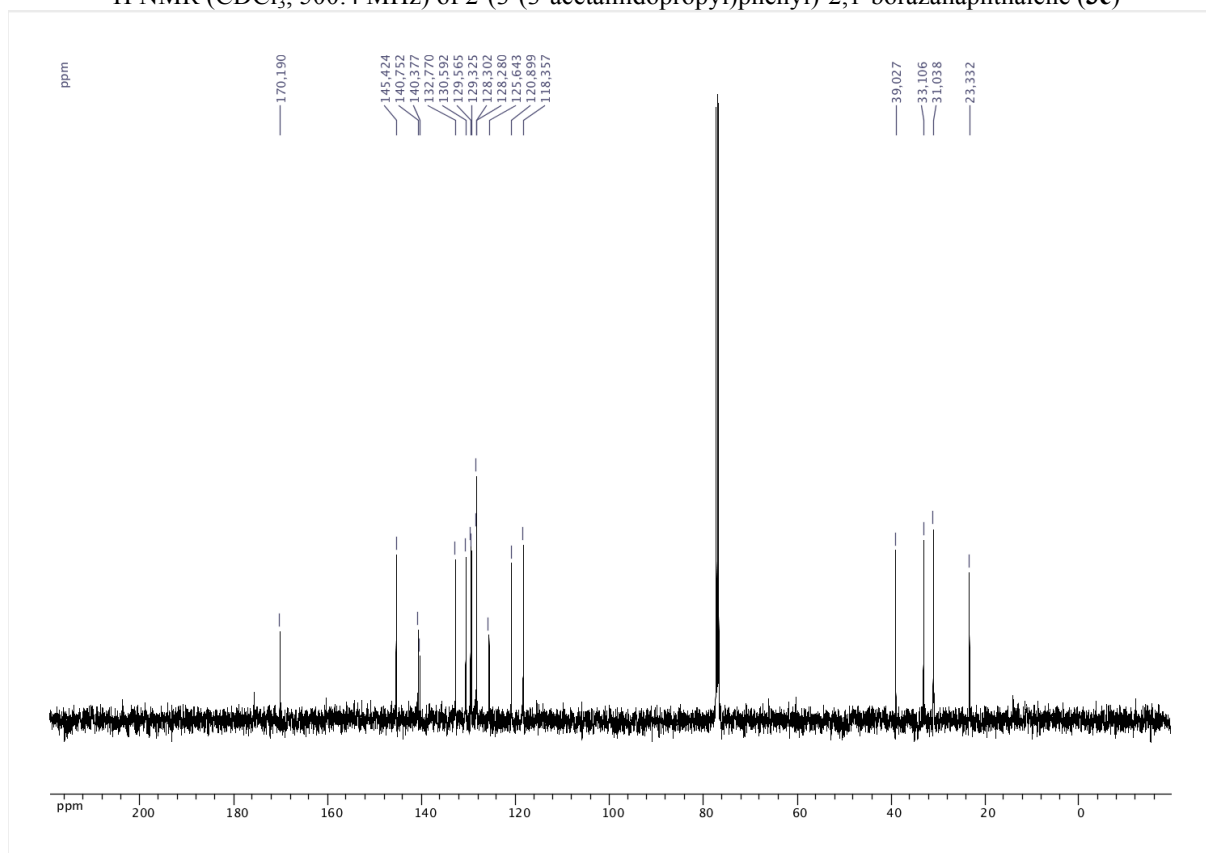

<sup>13</sup>C {<sup>1</sup>H} NMR (CDCl<sub>3</sub>, 125.8 MHz) of 2-(3-(3-acetamidopropyl)phenyl)-2,1-borazanaphthalene (**3c**)

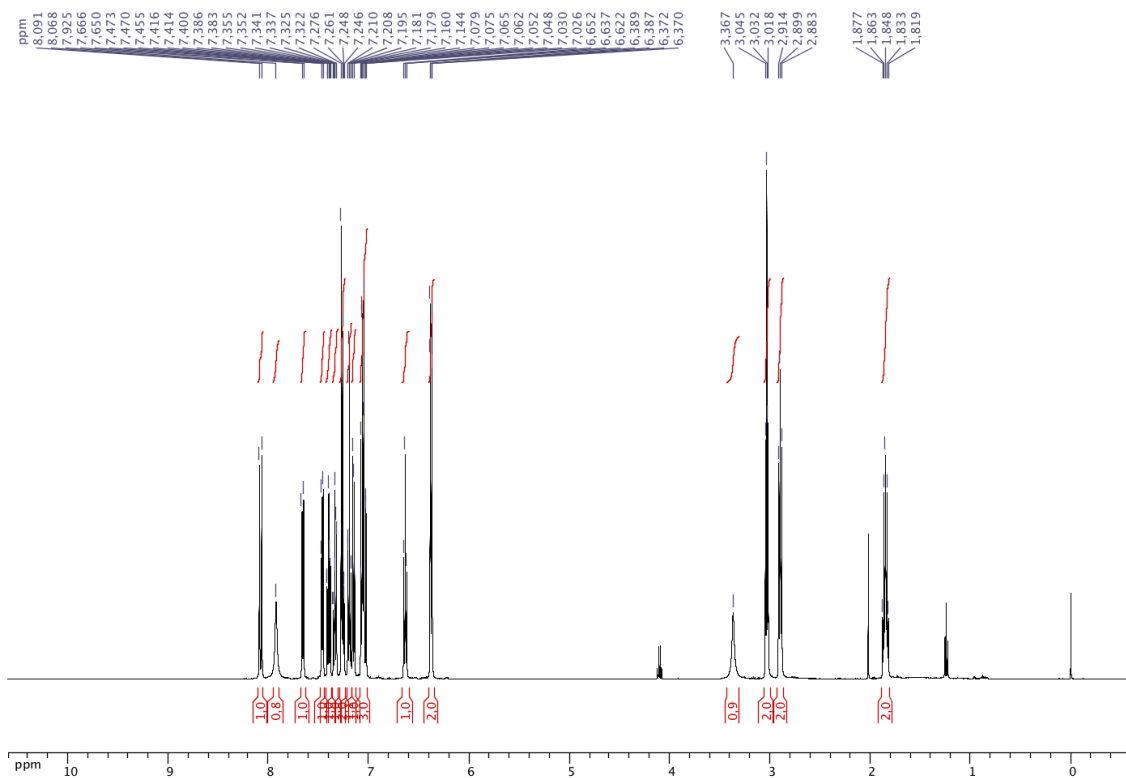

$^1\text{H}$  NMR ( $\text{CDCl}_3$ , 500.4 MHz) of 2-(2-(3-(phenylamino)propyl)phenyl)-2,1-borazanaphthalene (**4a**)

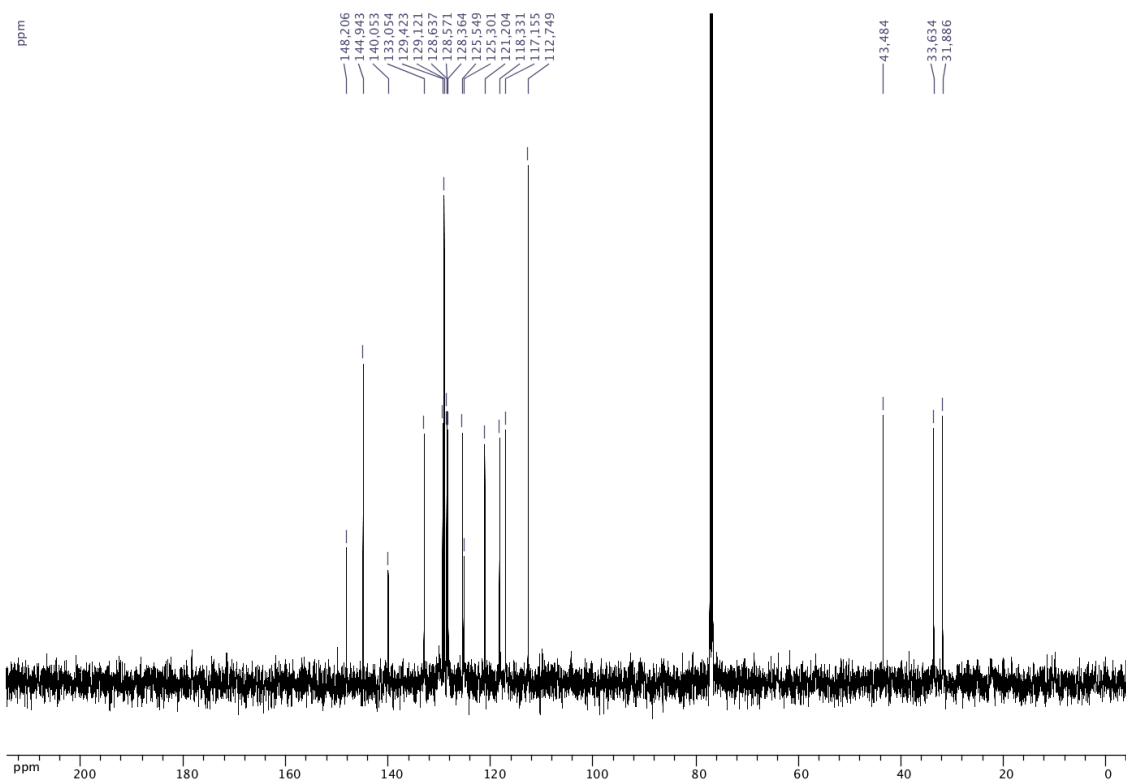

$^{13}\text{C}$   $\{^1\text{H}\}$  NMR ( $\text{CDCl}_3$ , 125.8 MHz) of 2-(2-(3-(phenylamino)propyl)phenyl)-2,1-borazanaphthalene (**4a**)



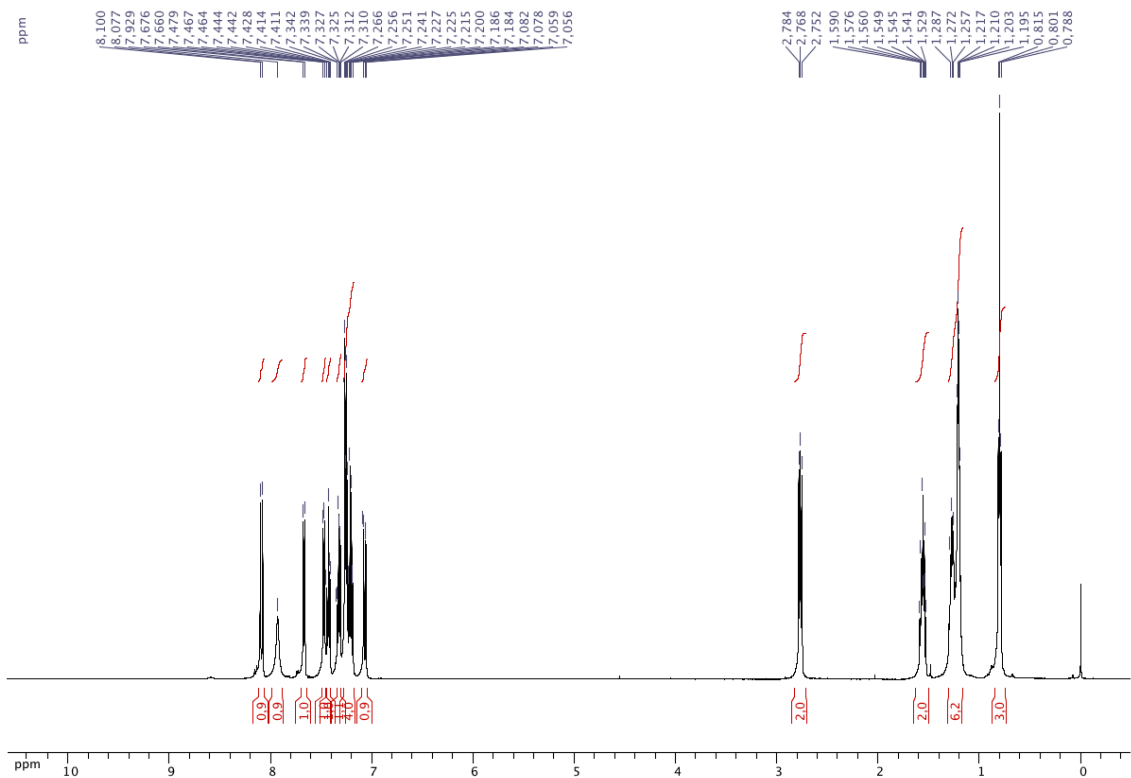

$^1\text{H}$  NMR ( $\text{CDCl}_3$ , 500.4 MHz) of 2-(2-hexylphenyl)-2,1-borazanaphthalene (**4b**)

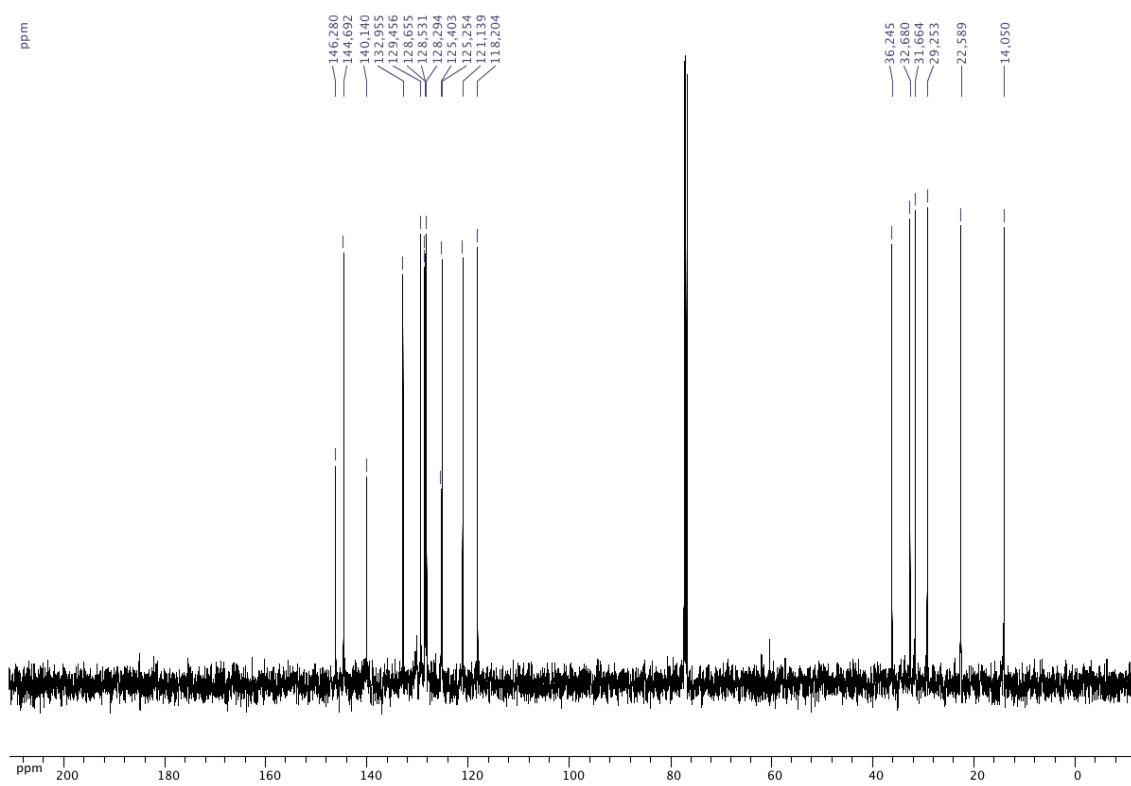

$^{13}\text{C}$   $\{^1\text{H}\}$  NMR ( $\text{CDCl}_3$ , 125.8 MHz) of 2-(2-hexylphenyl)-2,1-borazanaphthalene (**4b**)

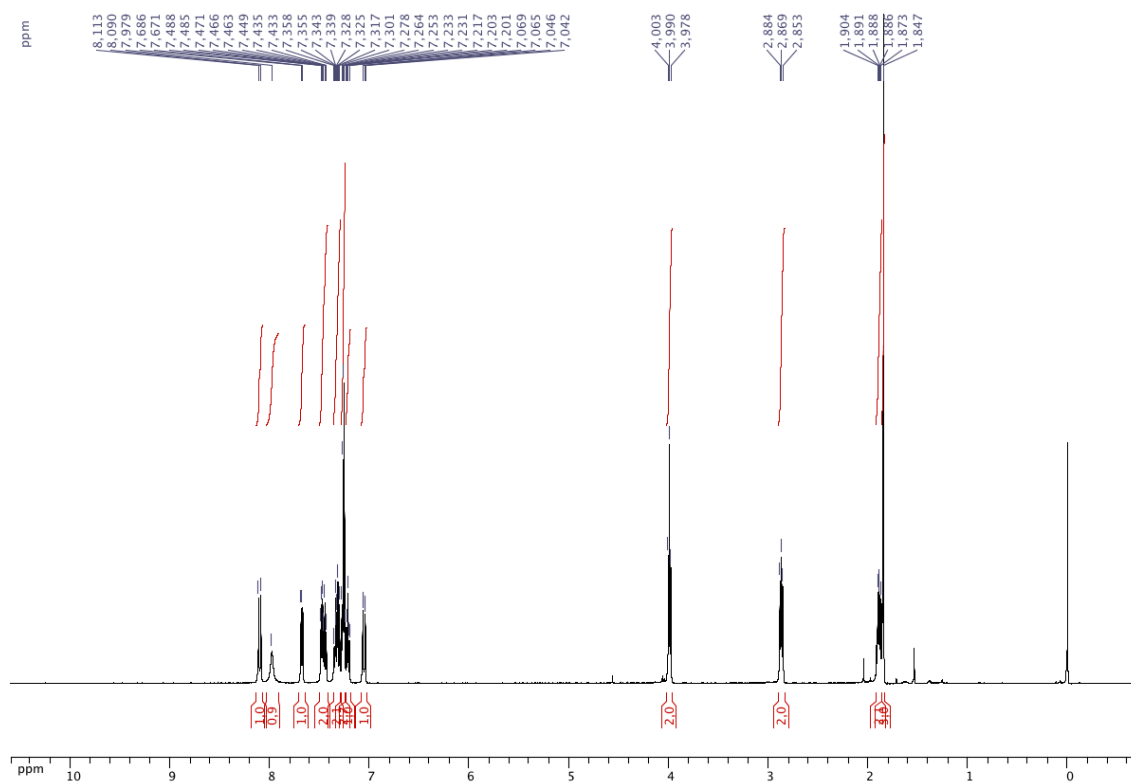

$^1\text{H}$  NMR ( $\text{CDCl}_3$ , 500.4 MHz) of 2-(2-(3-acetoxypropyl)phenyl)-2,1-borazanaphthalene (**4c**)

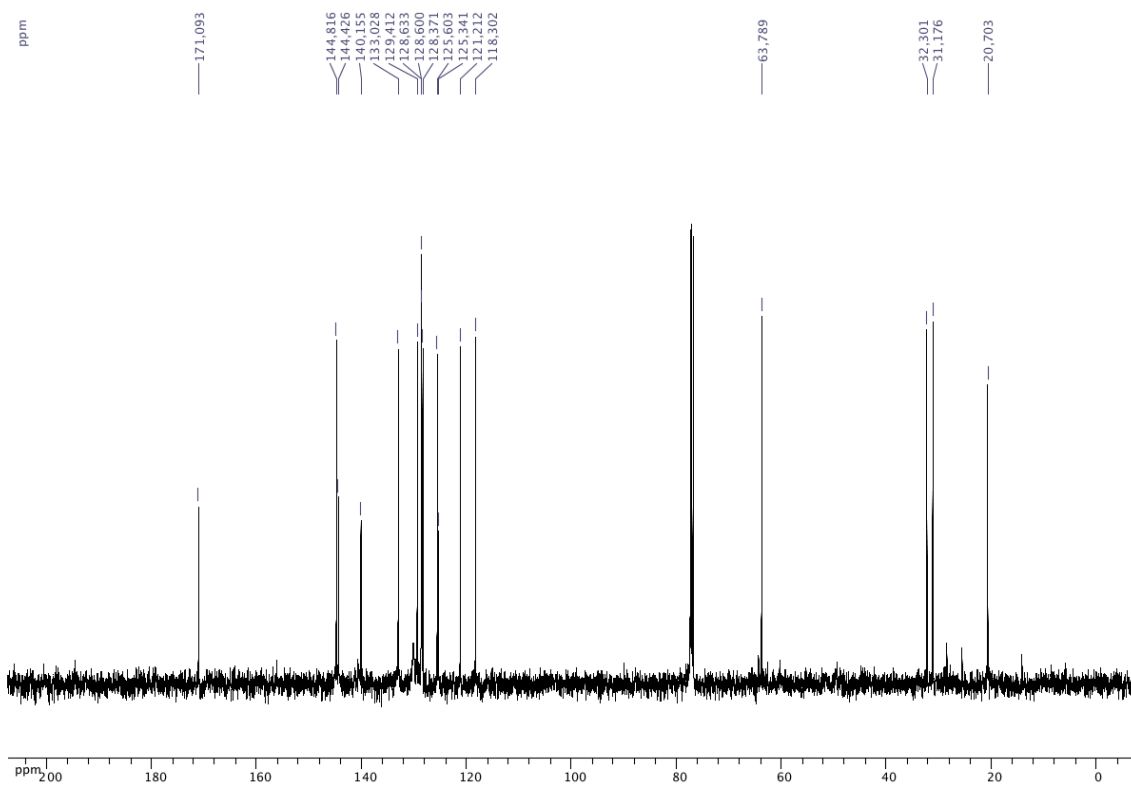

$^{13}\text{C}$   $\{^1\text{H}\}$  NMR ( $\text{CDCl}_3$ , 125.8 MHz) of 2-(2-(3-acetoxypropyl)phenyl)-2,1-borazanaphthalene (**4c**)

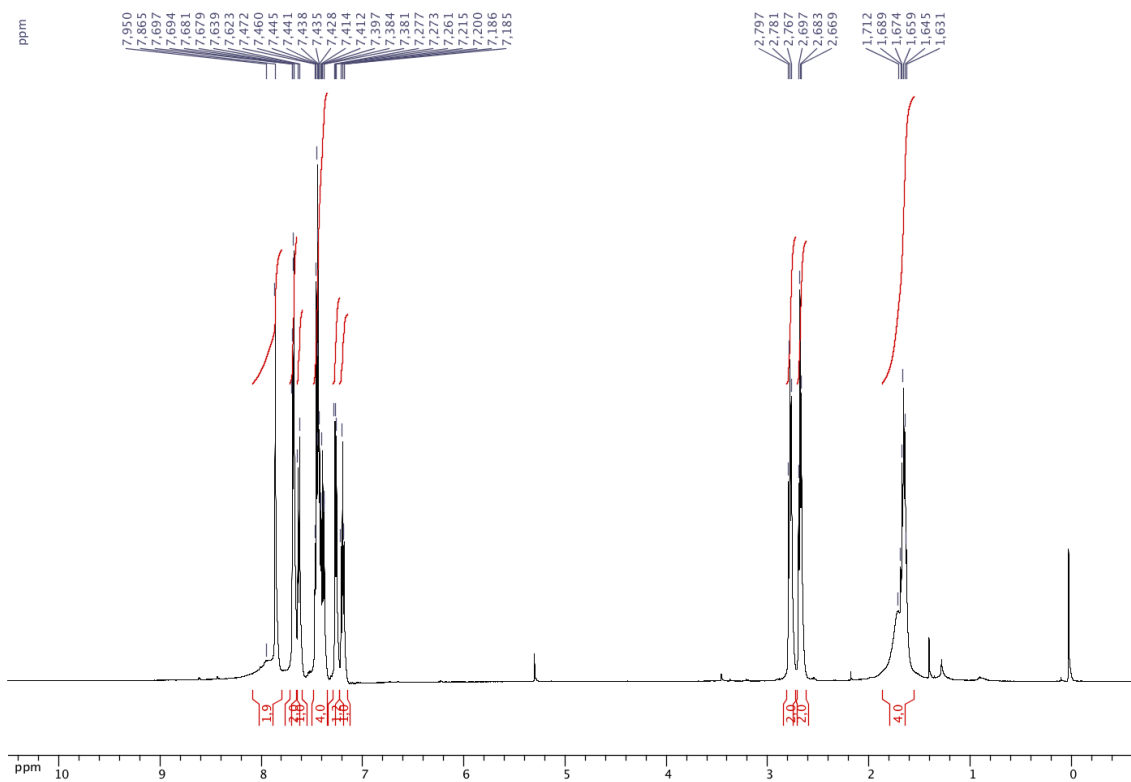

$^1\text{H}$  NMR ( $\text{CDCl}_3$ , 500.4 MHz) of 3-(3-aminopropyl)-2-phenyl-2,1-borazanaphthalene (**5a**)

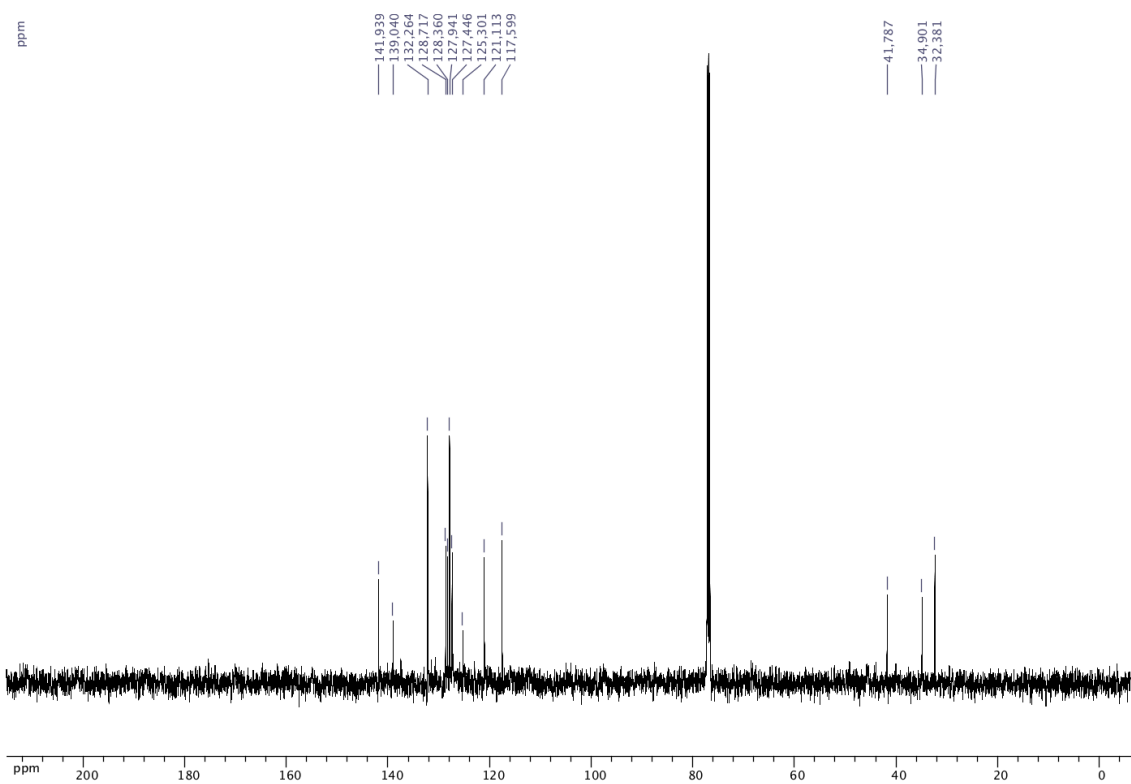

$^{13}\text{C}$   $\{^1\text{H}\}$  NMR ( $\text{CDCl}_3$ , 125.8 MHz) of 3-(3-aminopropyl)-2-phenyl-2,1-borazanaphthalene (**5a**)

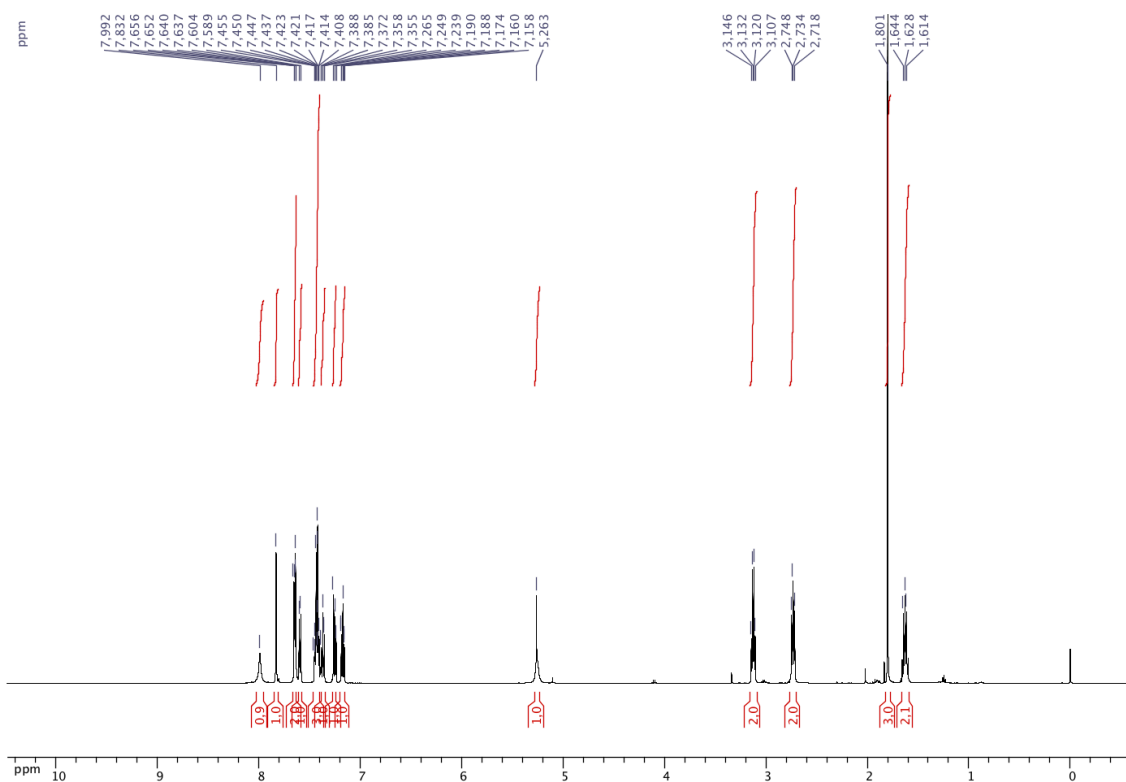

$^1\text{H}$  NMR ( $\text{CDCl}_3$ , 500.4 MHz) of 3-(3-acetamidopropyl)-2-phenyl-2,1-borazanaphthalene (**5b**)

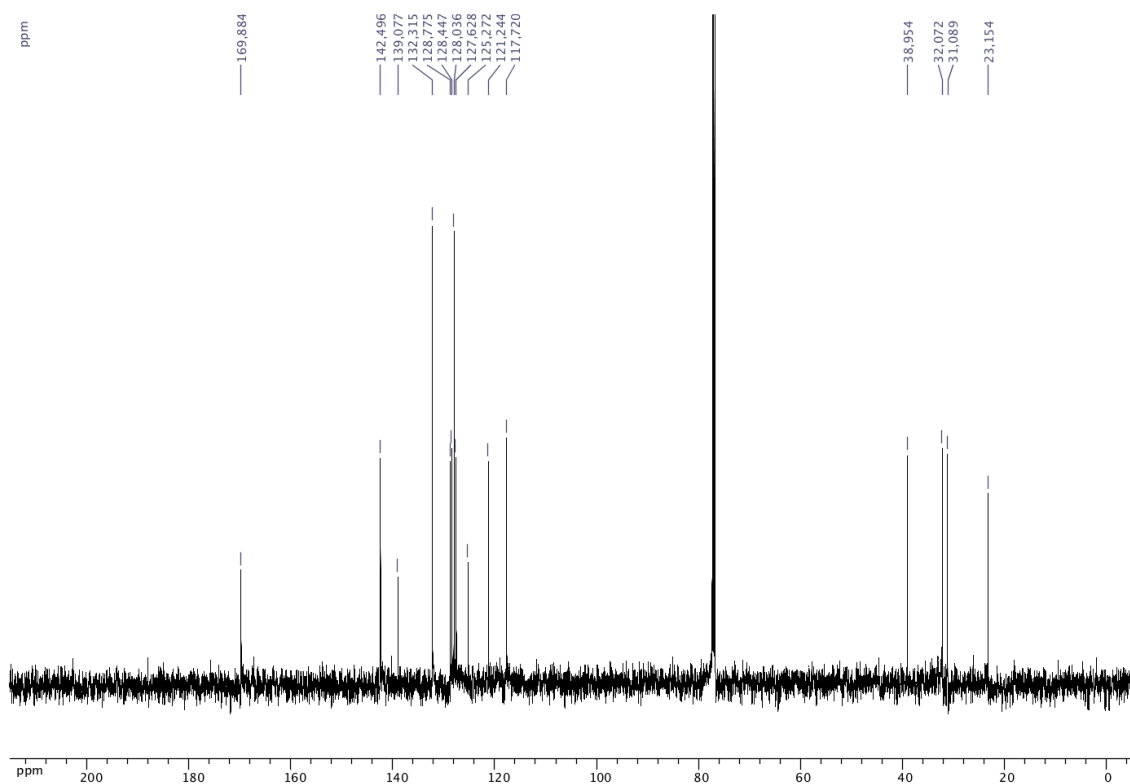

$^{13}\text{C}$   $\{^1\text{H}\}$  ( $\text{CDCl}_3$ , 125.8 MHz) of 3-(3-acetamidopropyl)-2-phenyl-2,1-borazanaphthalene (**5b**)

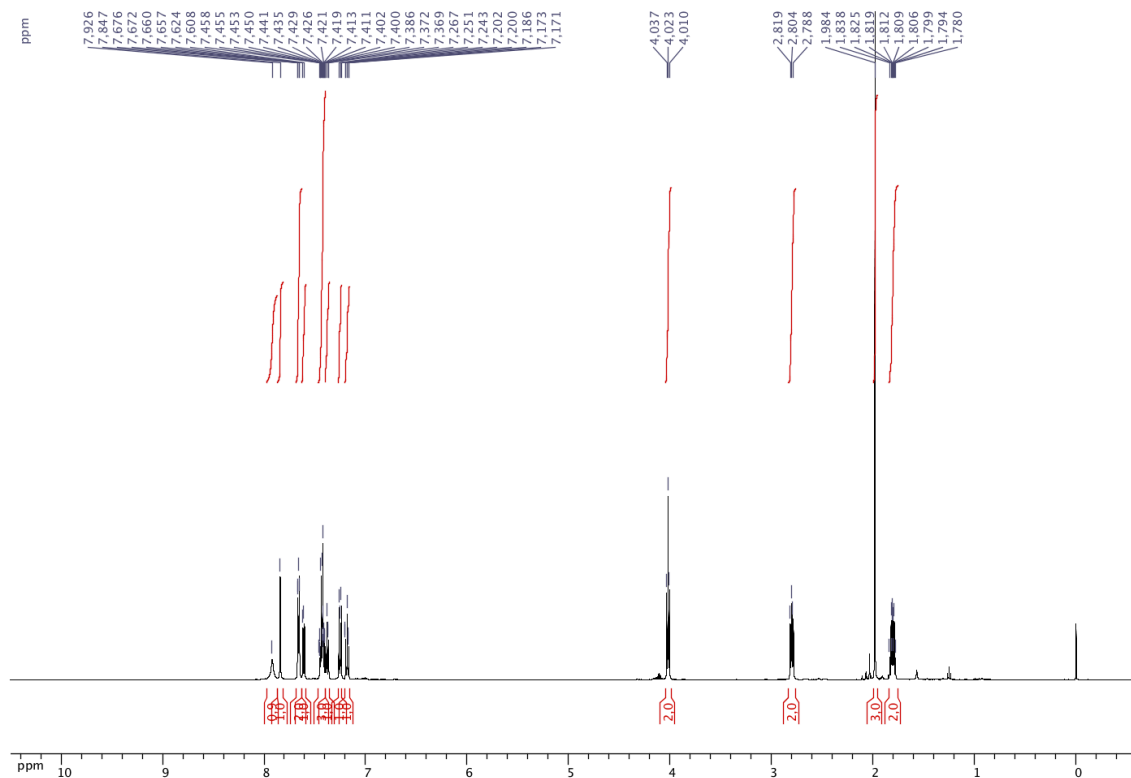

$^1\text{H}$  NMR ( $\text{CDCl}_3$ , 500.4 MHz) of 3-(3-acetoxypropyl)-2-phenyl-2,1-borazanaphthalene (**5c**)

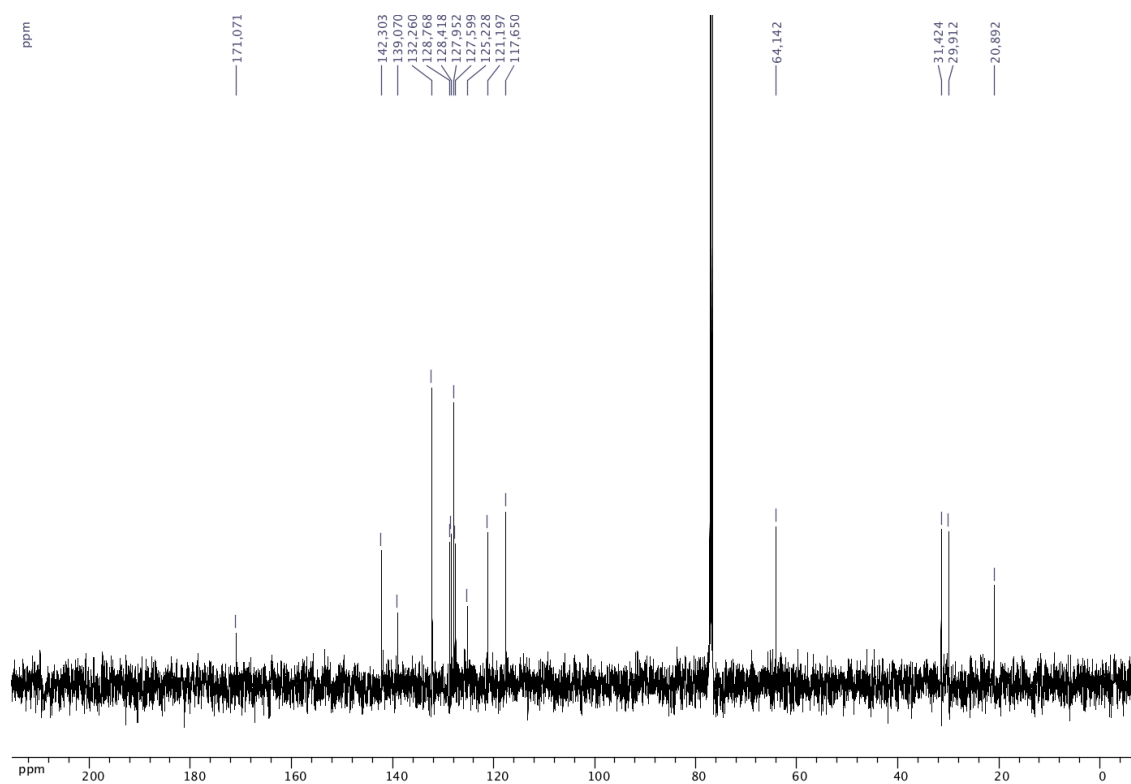

$^{13}\text{C}$   $\{^1\text{H}\}$  NMR ( $\text{CDCl}_3$ , 125.8 MHz) of 3-(3-acetoxypropyl)-2-phenyl-2,1-borazanaphthalene (**5c**)

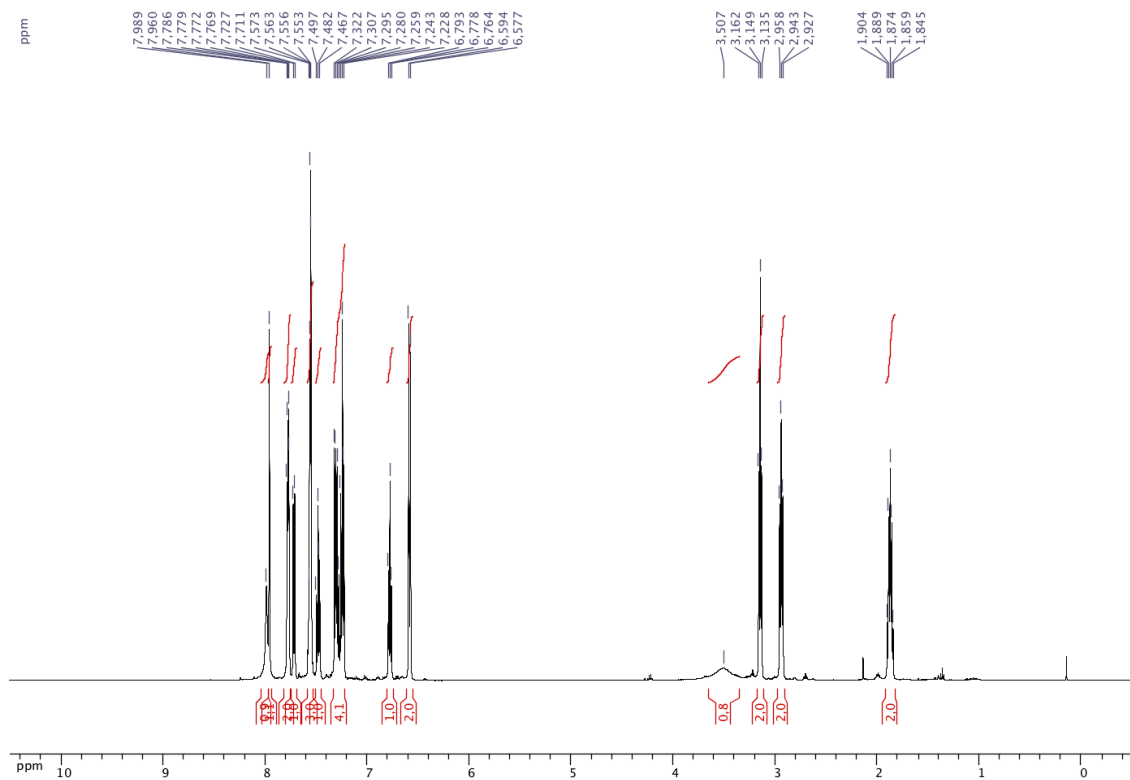

$^1\text{H}$  NMR ( $\text{CDCl}_3$ , 500.4 MHz) of 3-(3-(phenylamino)propyl)-2-phenyl-2,1-borazanaphthalene (**5d**)

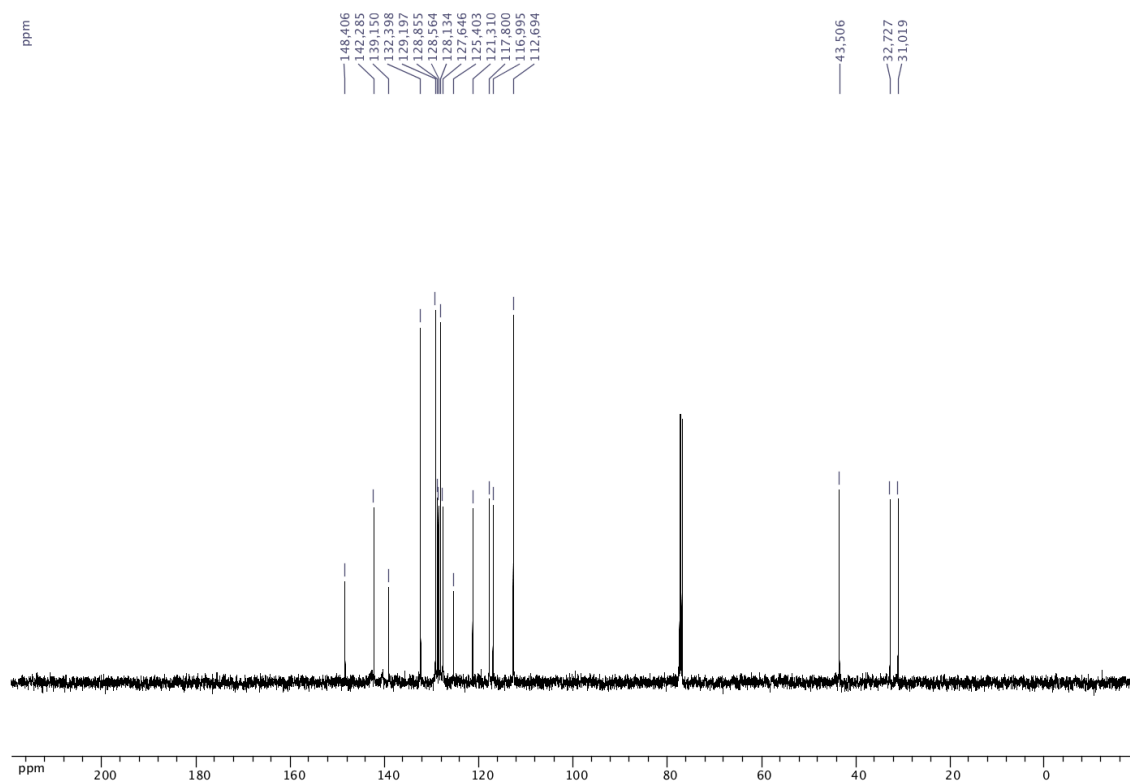

$^{13}\text{C}$   $\{^1\text{H}\}$  NMR ( $\text{CDCl}_3$ , 125.8 MHz) of 3-(3-(phenylamino)propyl)-2-phenyl-2,1-borazanaphthalene (**5d**)

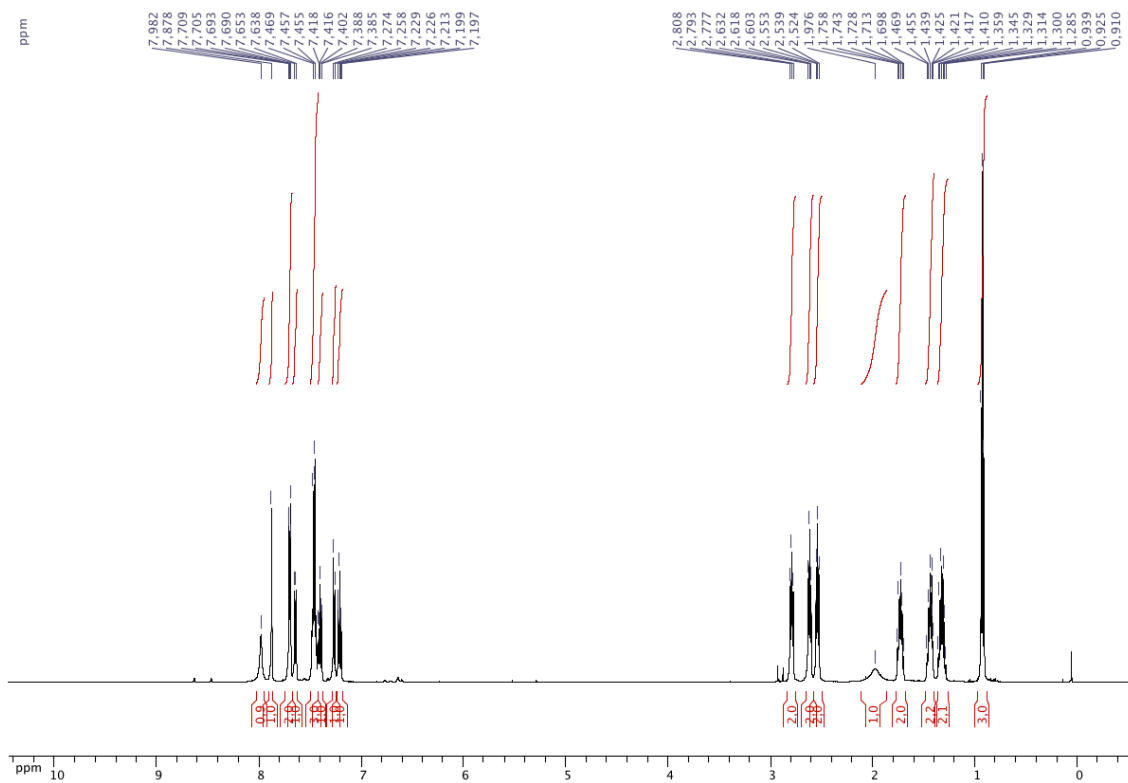

$^1\text{H}$  NMR ( $\text{CDCl}_3$ , 500.4 MHz) of 3-(3-(butylamino)propyl)-2-phenyl-2,1-borazanaphthalene (**5e**)

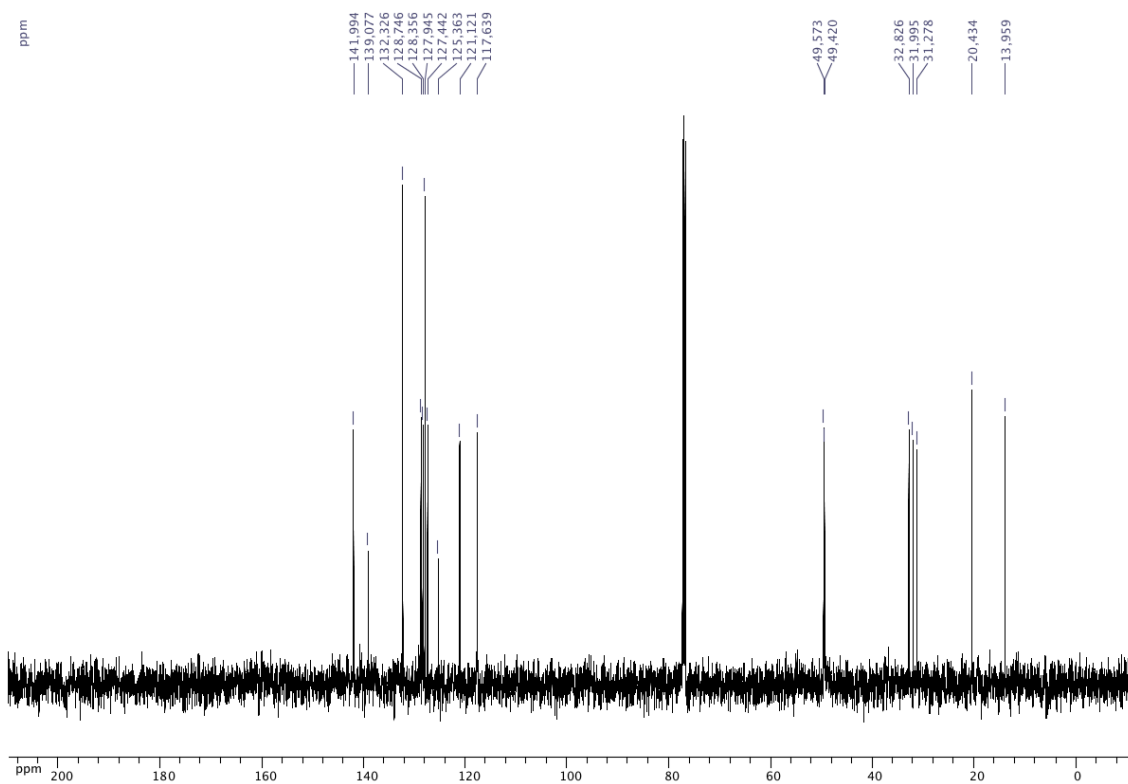

$^{13}\text{C}$   $\{^1\text{H}\}$  NMR ( $\text{CDCl}_3$ , 125.8 MHz) of 3-(3-(butylamino)propyl)-2-phenyl-2,1-borazanaphthalene (**5e**)

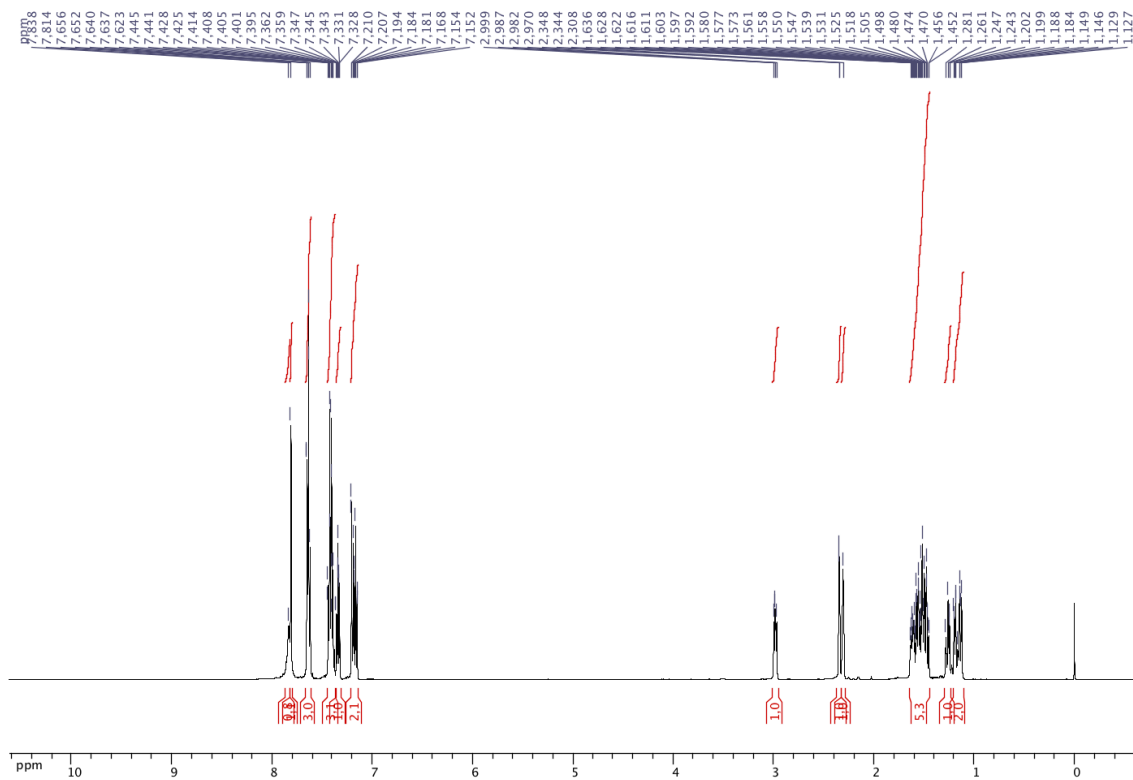

$^1\text{H}$  NMR ( $\text{CDCl}_3$ , 500.4 MHz) of 3-(*exo*-bicyclo[2.2.1]heptan-2-yl)-2-phenyl-2,1-borazanaphthalene (**5f**)

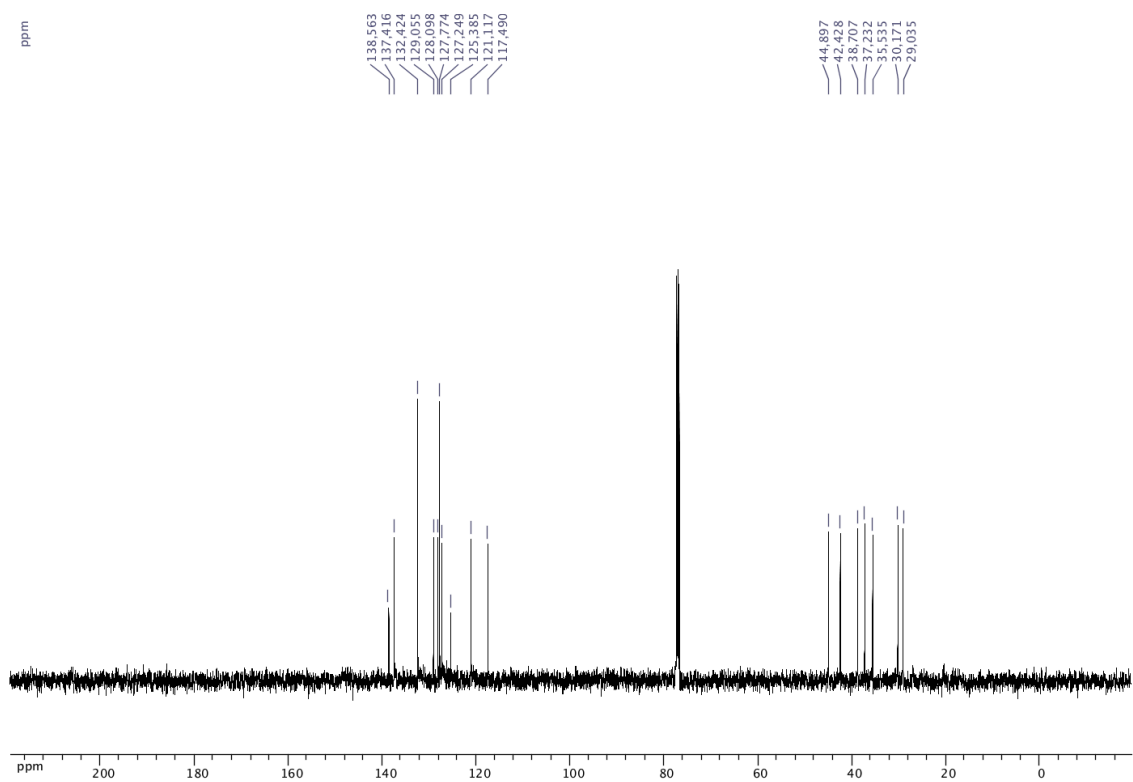

$^{13}\text{C}$   $\{^1\text{H}\}$  NMR ( $\text{CDCl}_3$ , 125.8 MHz) of 3-(*exo*-bicyclo[2.2.1]heptan-2-yl)-2-phenyl-2,1-borazanaphthalene (**5f**)



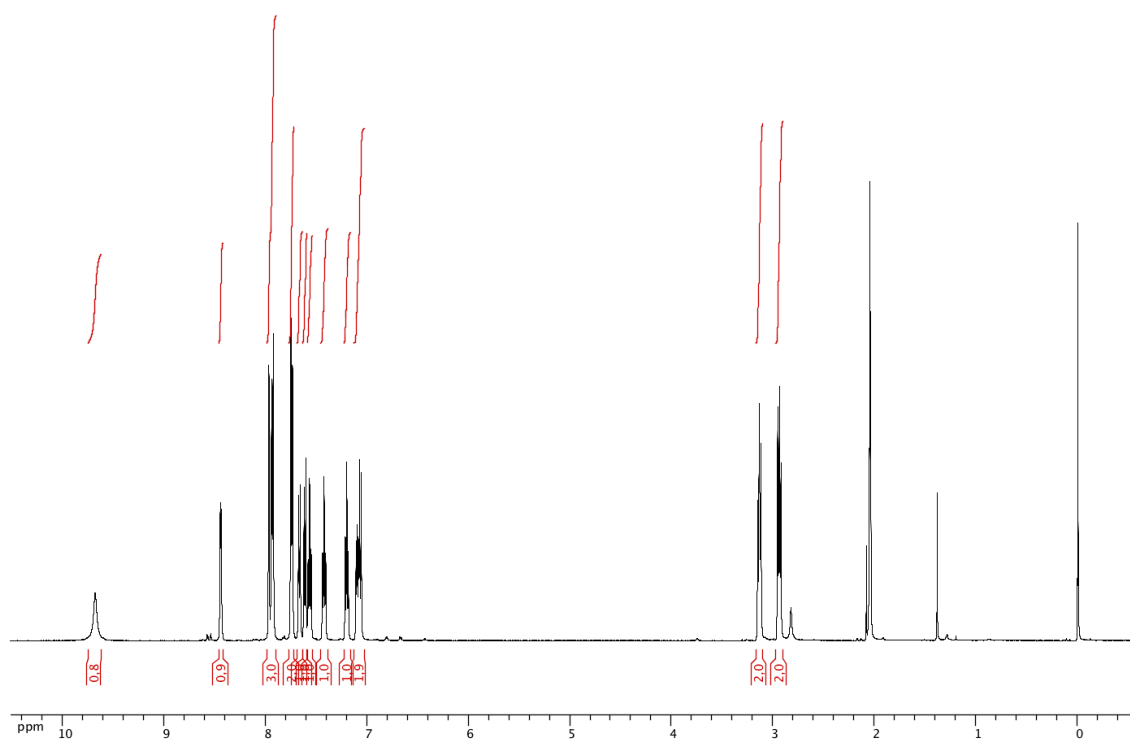

$^1\text{H}$  NMR (acetone- $d_6$ , 500.4 MHz) of 3-(2-pyridin-2-yl)ethyl-2-(4-trifluoromethylphenyl)-2,1-borazanaphthalene (**6**)

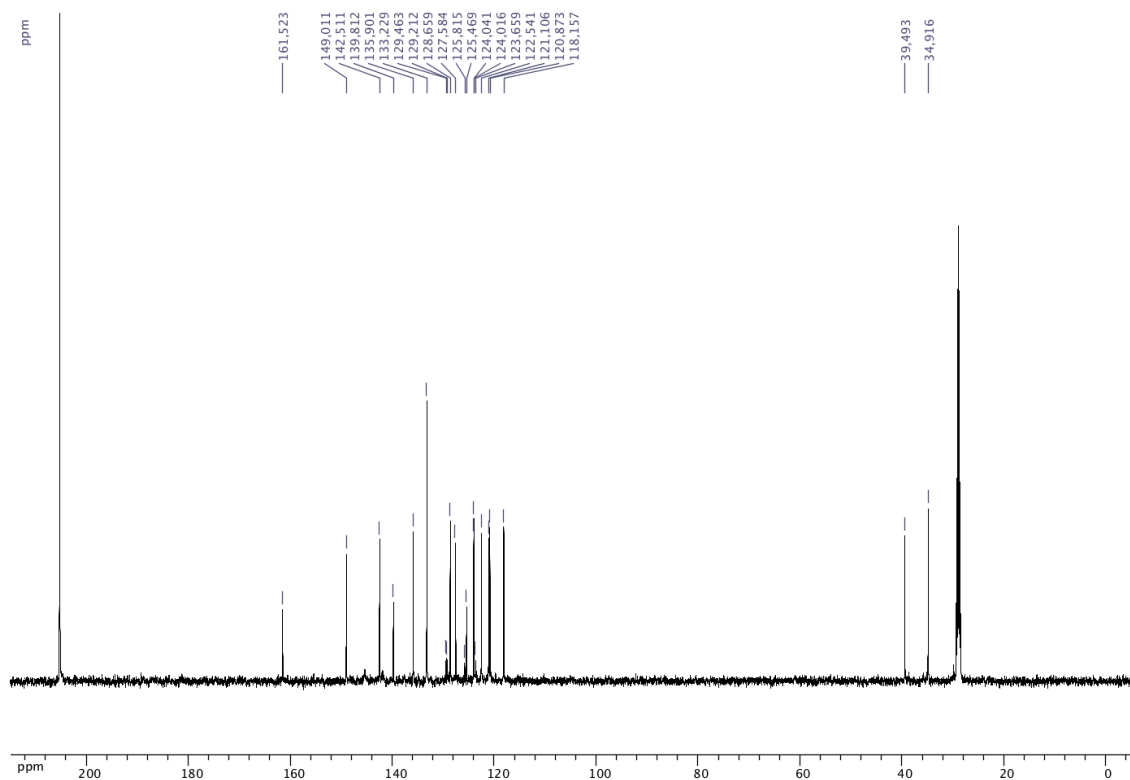

$^{13}\text{C}$   $\{^1\text{H}\}$  NMR (acetone- $d_6$ , 125.8 MHz) of 3-(2-pyridin-2-yl)ethyl-2-(4-trifluoromethylphenyl)-2,1-borazanaphthalene (**6**)

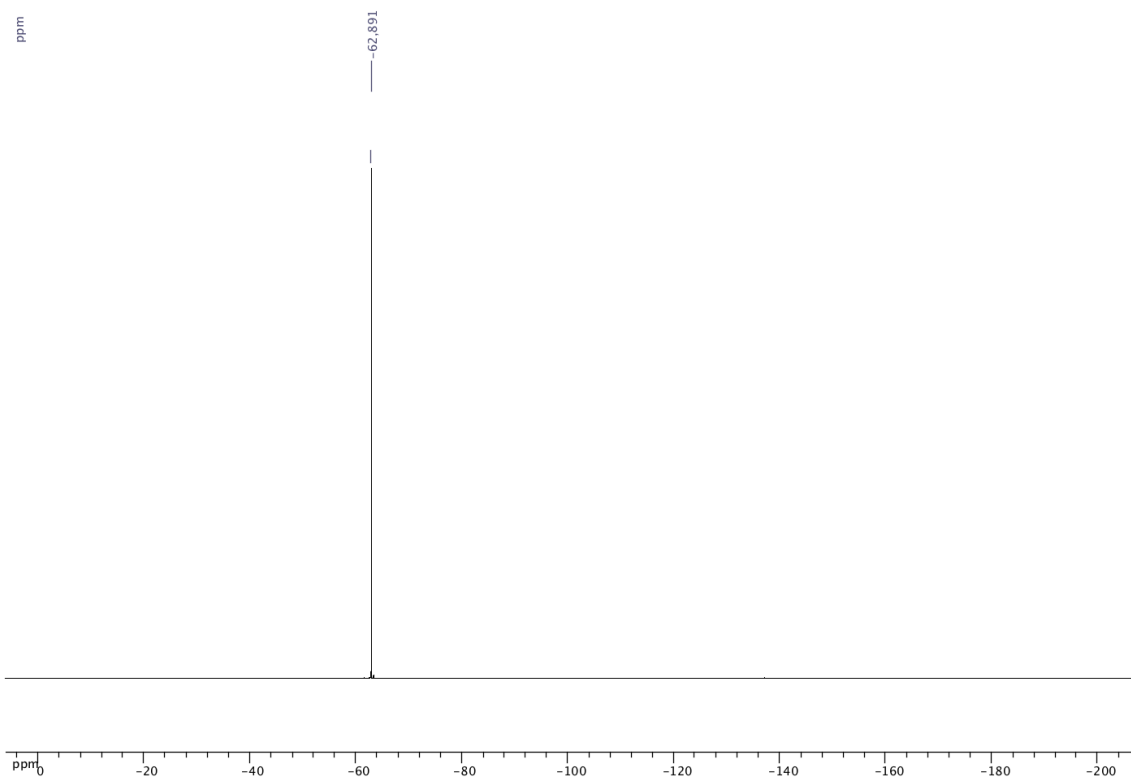

$^{19}\text{F}$   $\{^1\text{H}\}$  NMR (acetone- $d_6$ , 470.8 MHz) of 3-(2-pyridin-2-yl)ethyl)-2-(4-trifluoromethylphenyl)-2,1-borazanaphthalene (**6**)

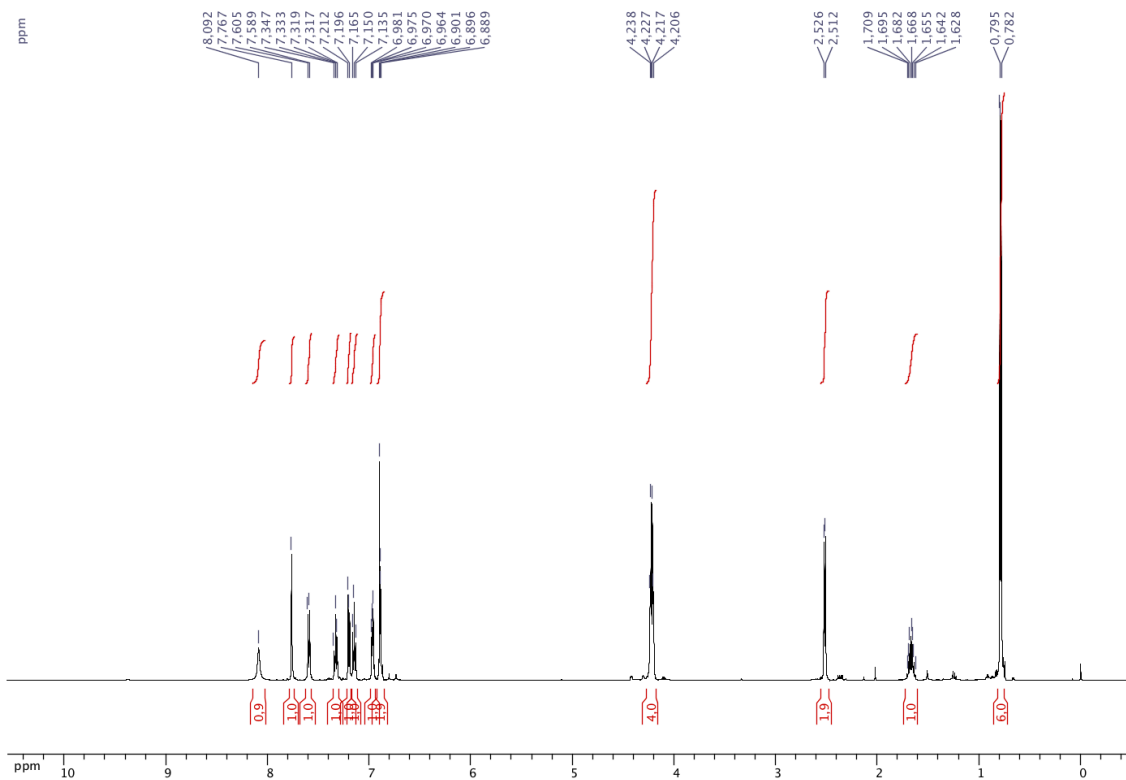

$^1\text{H}$  NMR ( $\text{CDCl}_3$ , 500.4 MHz) of 3-(isobutyl)-2-(2,3-dihydro-1,4-benzodioxin-6-yl)-2,1-borazanaphthalene (7)

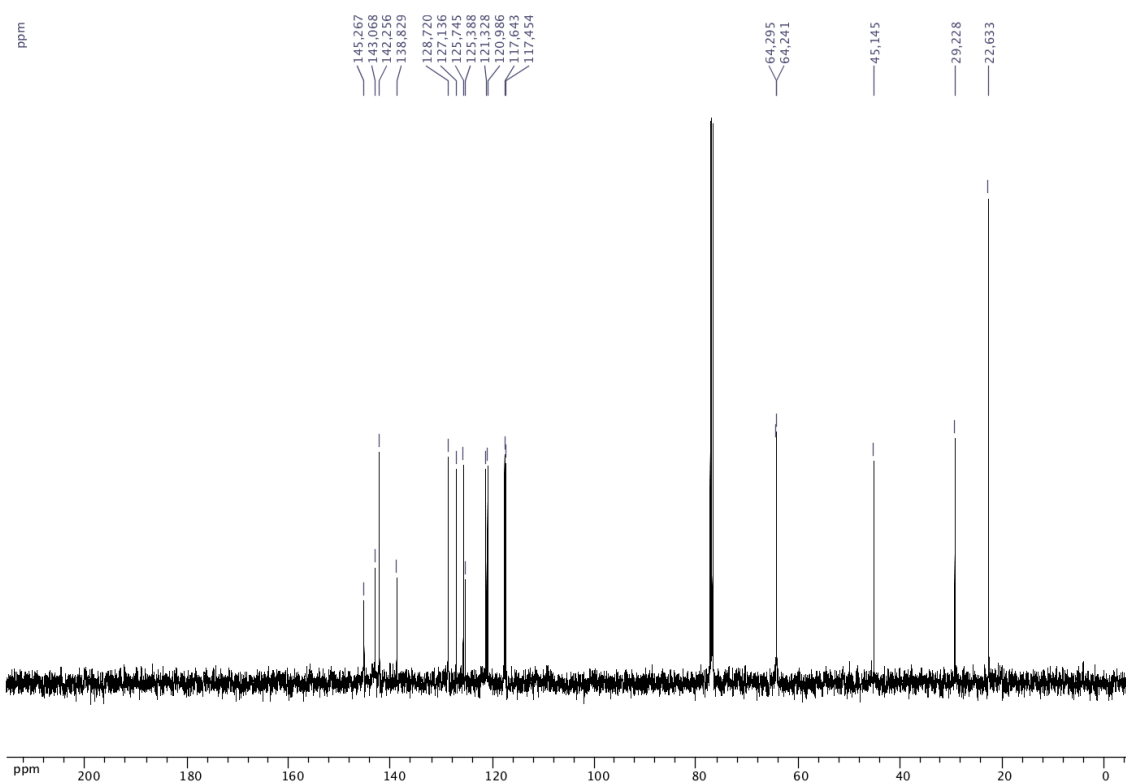

$^{13}\text{C}$   $\{^1\text{H}\}$  NMR ( $\text{CDCl}_3$ , 125.8 MHz) of 3-(isobutyl)-2-(2,3-dihydro-1,4-benzodioxin-6-yl)-2,1-borazanaphthalene (7)

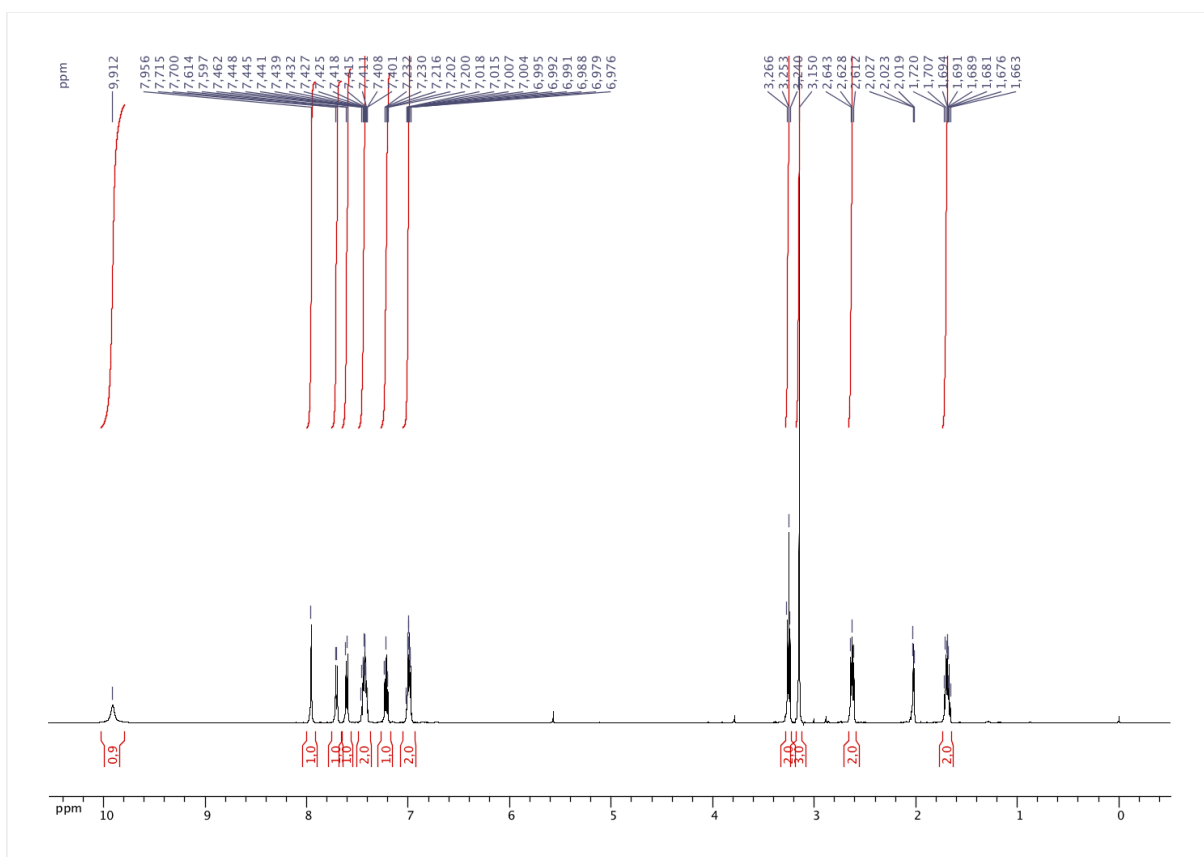

$^1\text{H}$  NMR (acetone- $d_6$ , 500.4 MHz) of 3-(3-methoxypropyl)-2-(2,6-difluorophenyl)-2,1-borazanaphthalene (**8**)

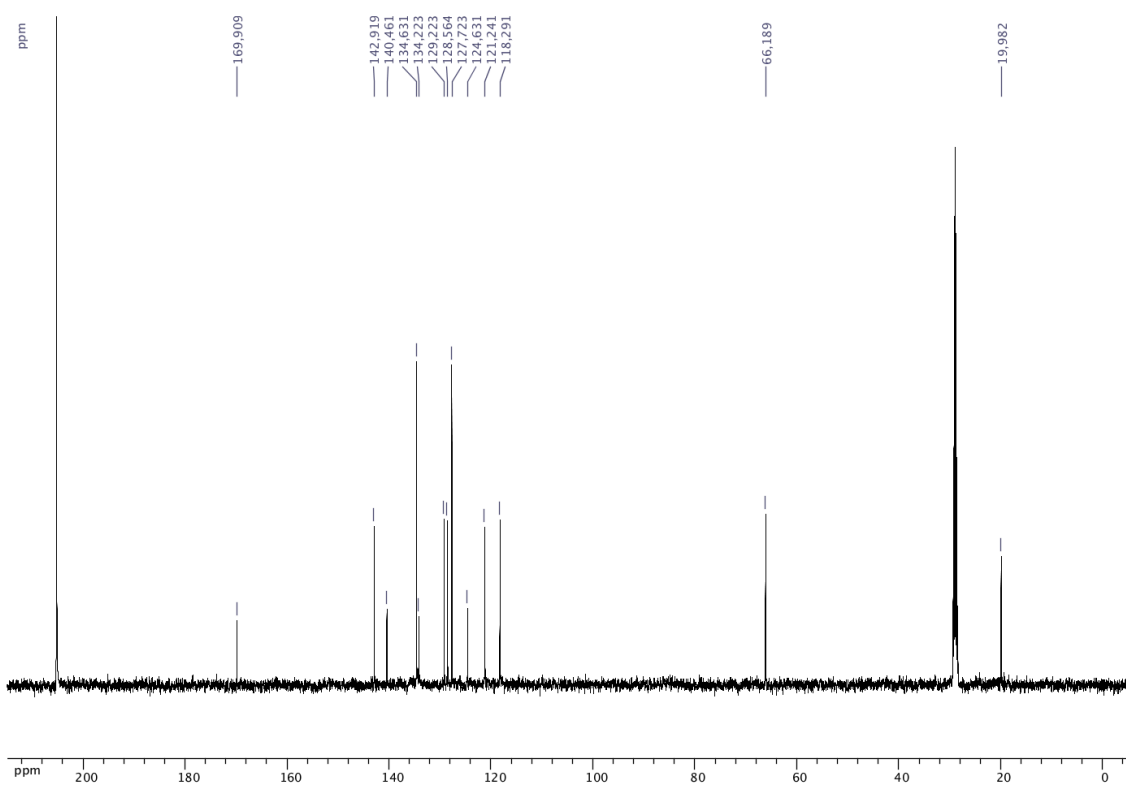

$^{13}\text{C}$   $\{^1\text{H}\}$  NMR (acetone- $d_6$ , 125.8 MHz) of 3-(3-methoxypropyl)-2-(2,6-difluorophenyl)-2,1-borazanaphthalene (**8**)

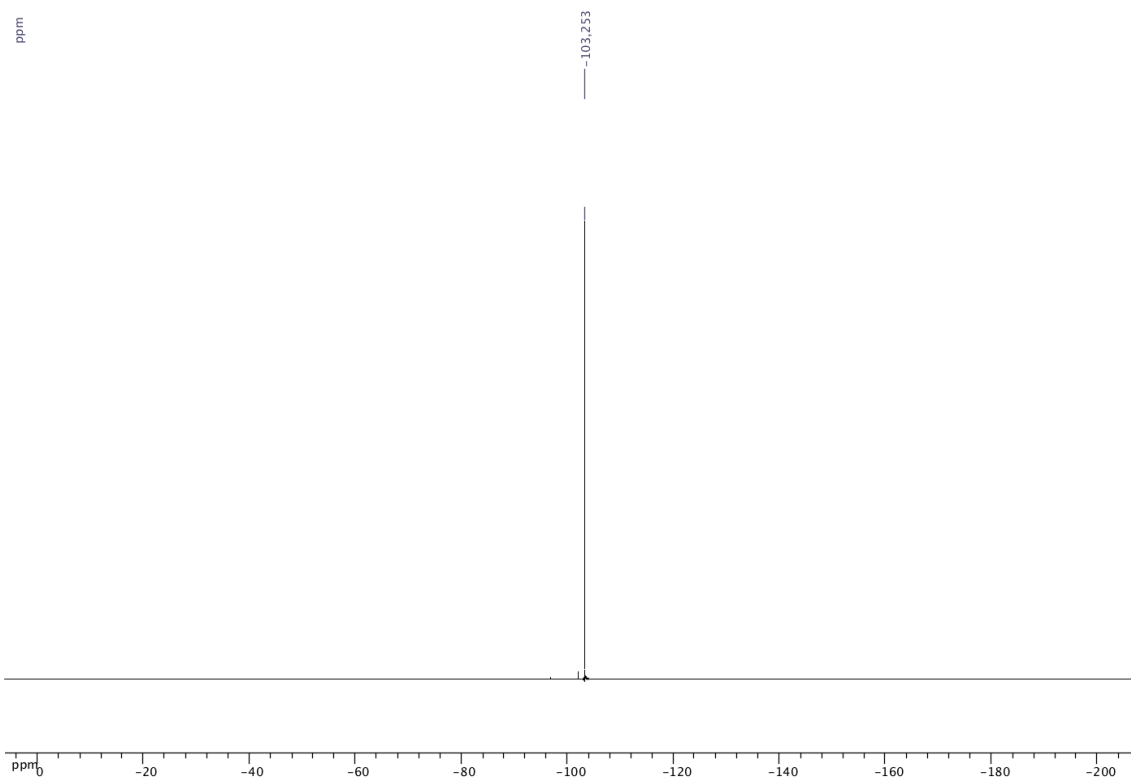

$^{19}\text{F}$   $\{^1\text{H}\}$  NMR (acetone- $d_6$ , 470.8 MHz) of 3-(3-methoxypropyl)-2-(2,6-difluorophenyl)-2,1-borazanaphthalene (**8**)

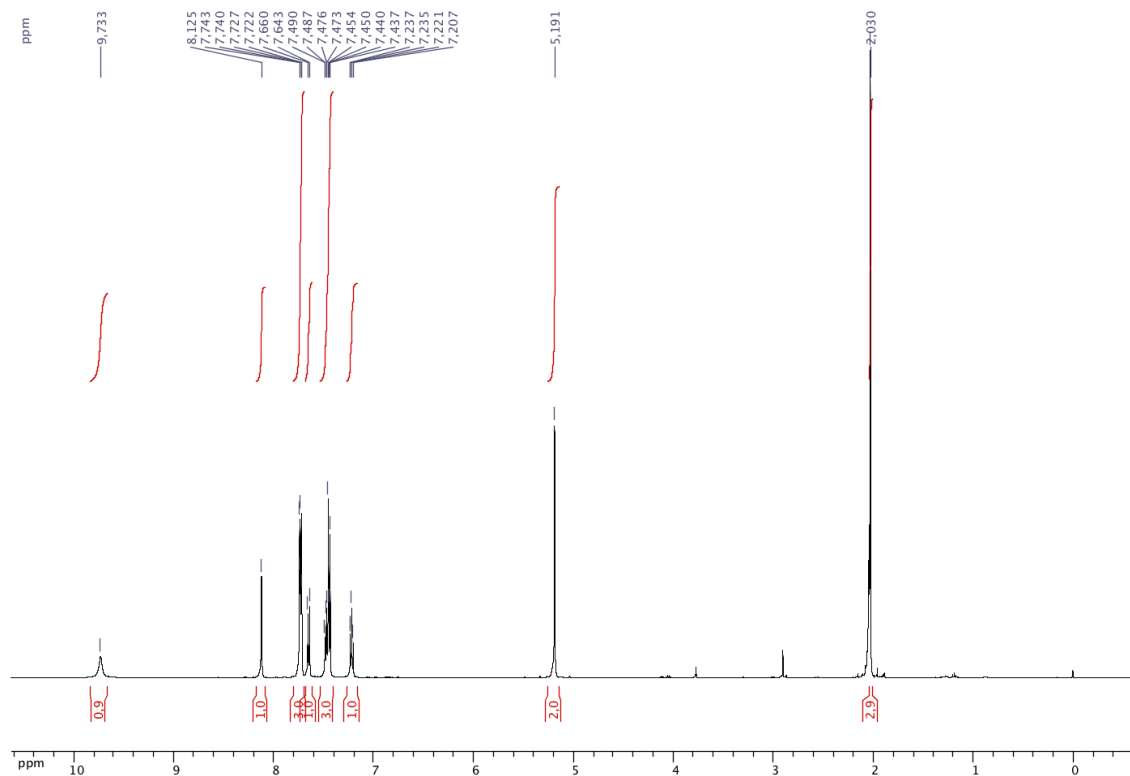

$^1\text{H}$  NMR (acetone- $d_6$ , 500.4 MHz) of 3-(acetoxymethyl)-2-(4-chlorophenyl)-2,1-borazanaphthalene (**9**)

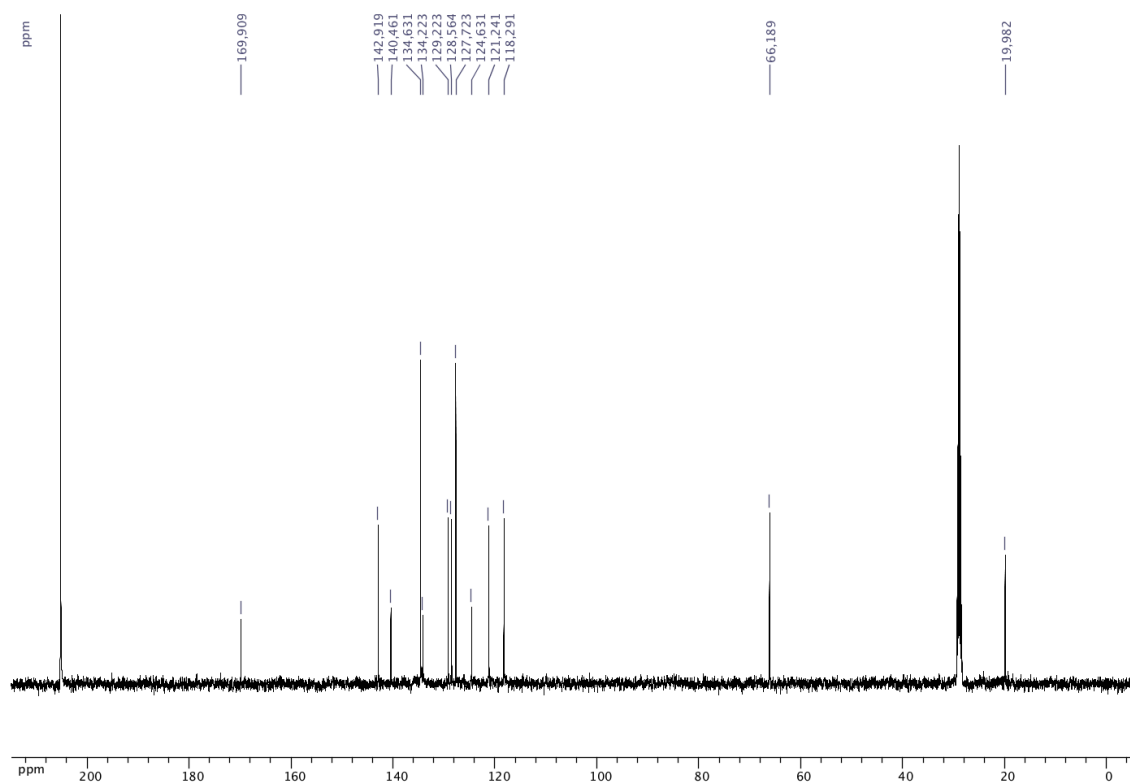

$^{13}\text{C}$   $\{^1\text{H}\}$  NMR (acetone- $d_6$ , 125.8 MHz) of 3-(acetoxymethyl)-2-(4-chlorophenyl)-2,1-borazanaphthalene (**9**)

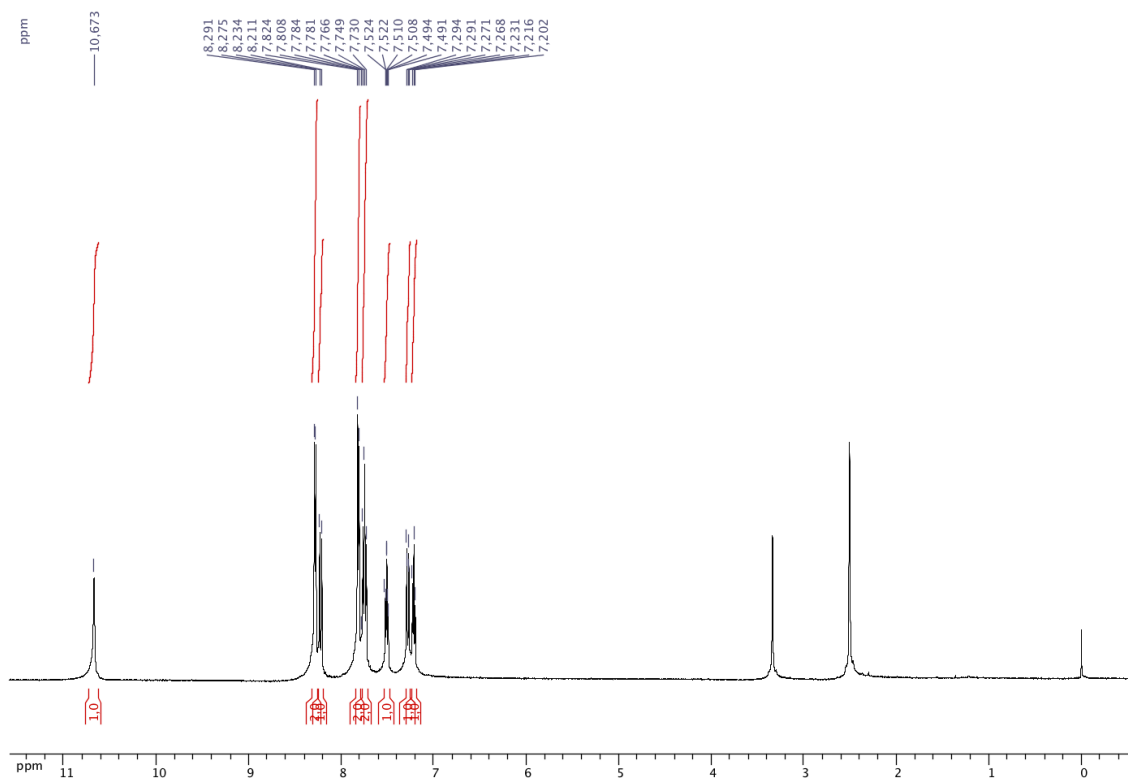

$^1\text{H}$  NMR (DMSO- $d_6$ , 500.4 MHz) of 2-(4-(trifluoromethyl)phenyl)-2,1-borazanaphthalene (**10a**)

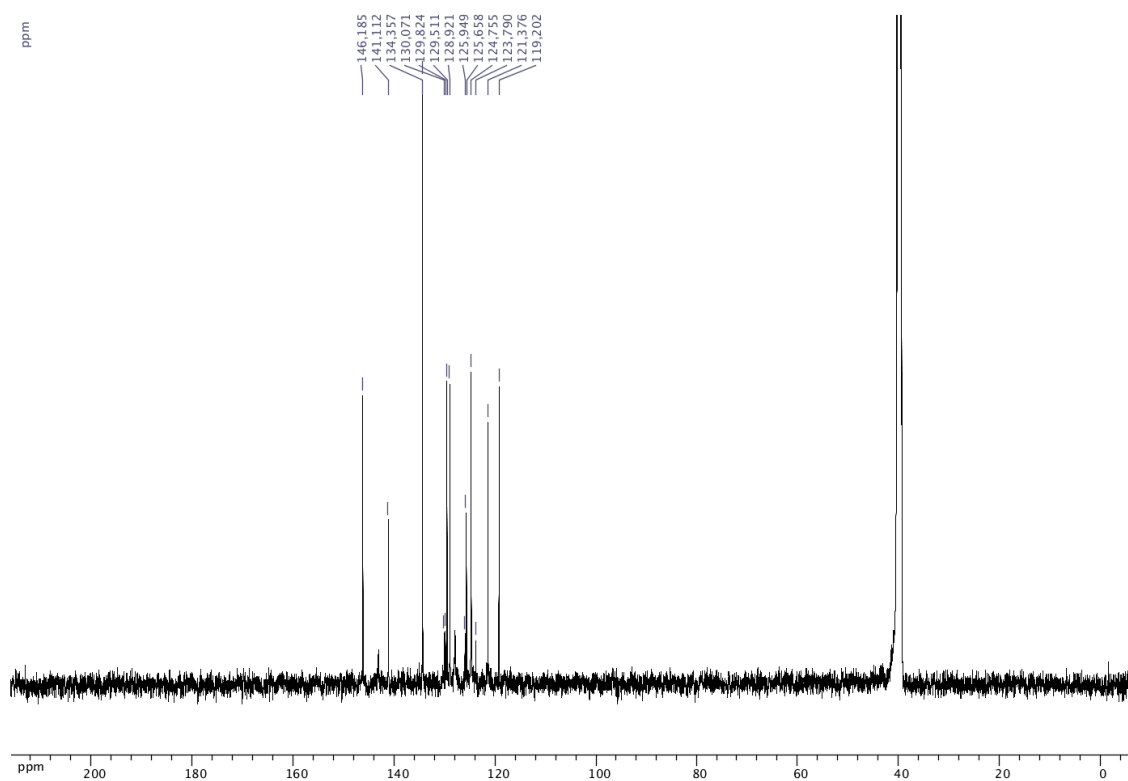

$^{13}\text{C}$   $\{^1\text{H}\}$  NMR (DMSO- $d_6$ , 125.8 MHz) of 2-(4-(trifluoromethyl)phenyl)-2,1-borazanaphthalene (**10a**)

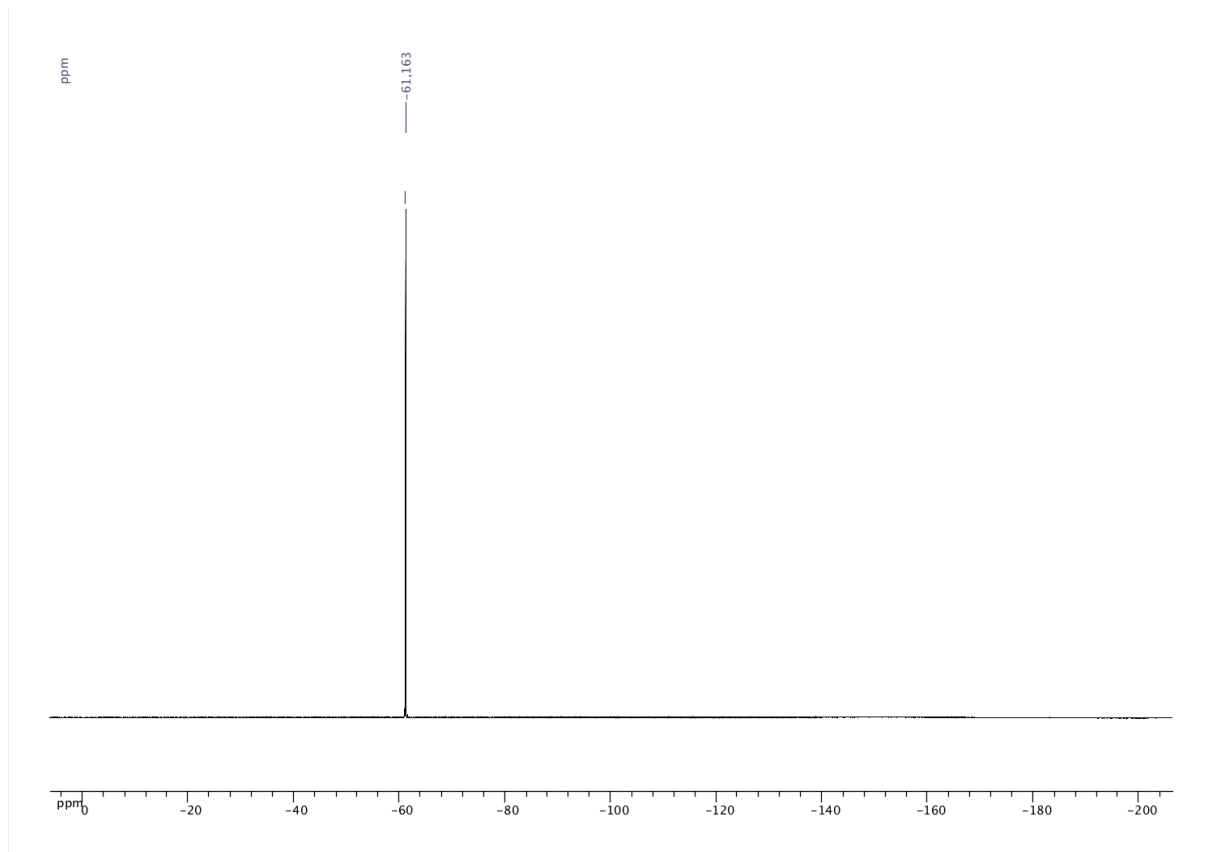

$^{19}\text{F}$   $\{^1\text{H}\}$  NMR (DMSO- $d_6$ , 470.8 MHz) of 2-(4-(trifluoromethyl)phenyl)-2,1-borazanaphthalene (**10a**)



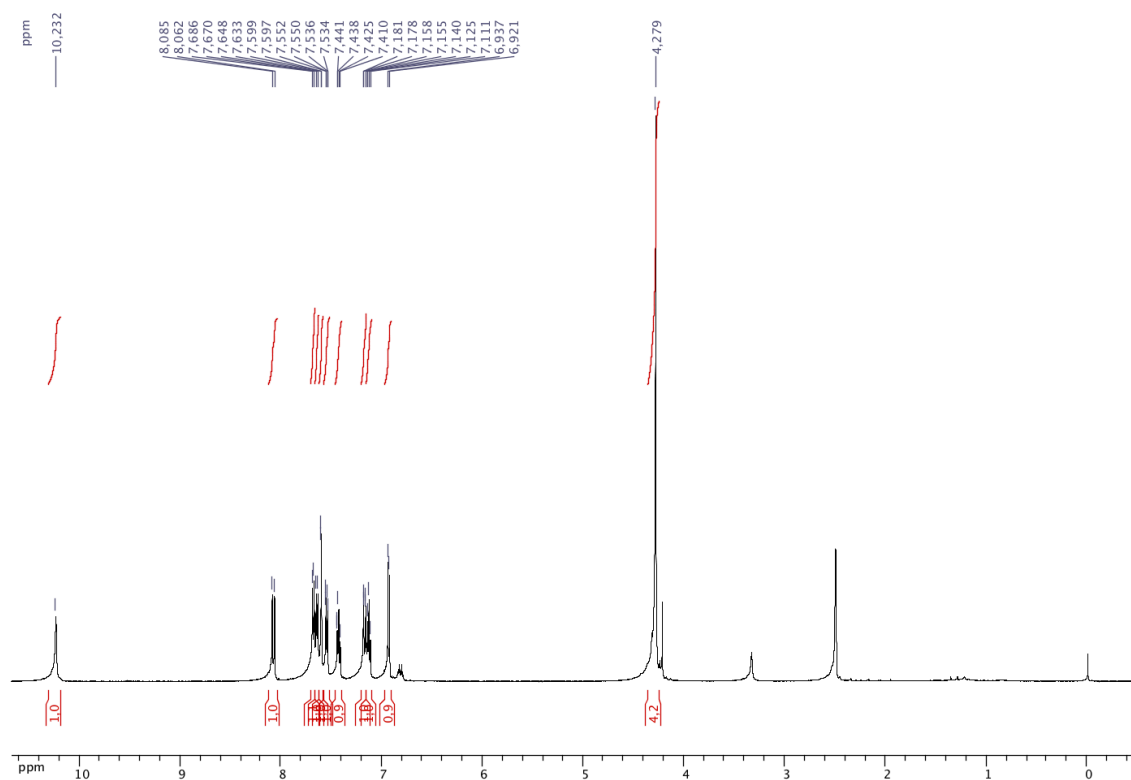

$^1\text{H}$  NMR (DMSO- $d_6$ , 500.4 MHz) of 2-(2,3-dihydro-1,4-benzodioxin-6-yl)-2,1-borazanaphthalene (**10b**)

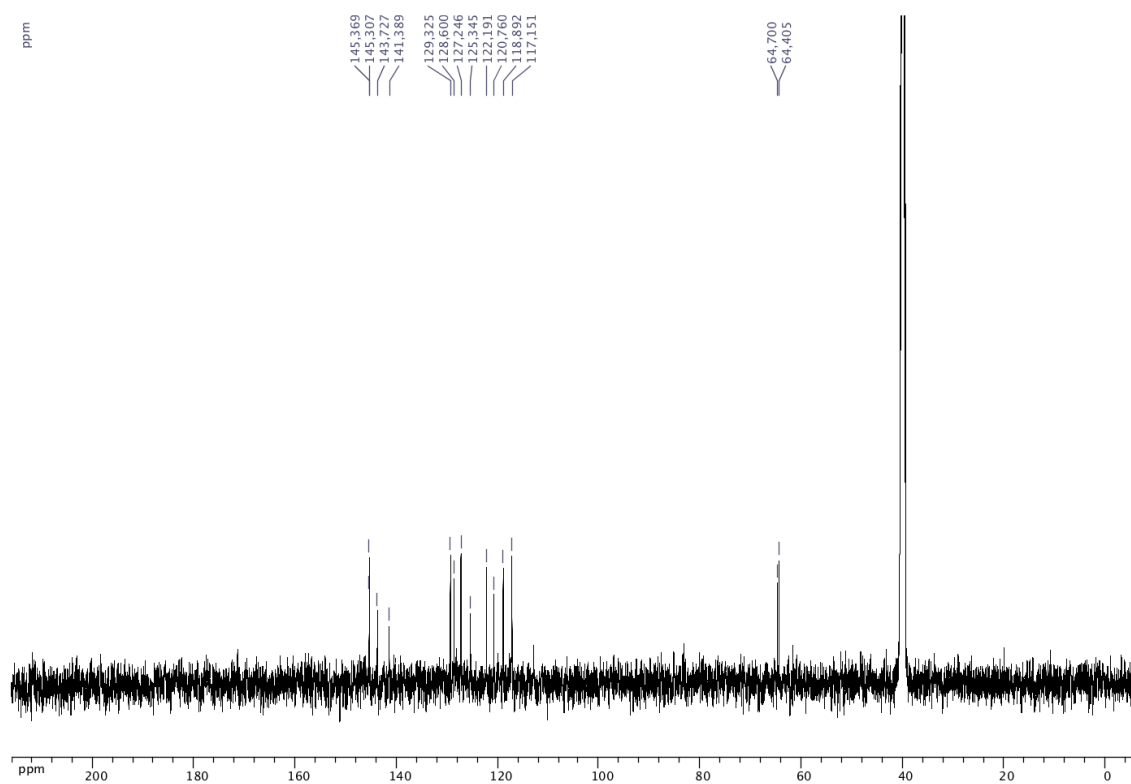

$^{13}\text{C}$   $\{^1\text{H}\}$  NMR (DMSO- $d_6$ , 125.8 MHz) of 2-(2,3-dihydro-1,4-benzodioxin-6-yl)-2,1-borazanaphthalene (**10b**)

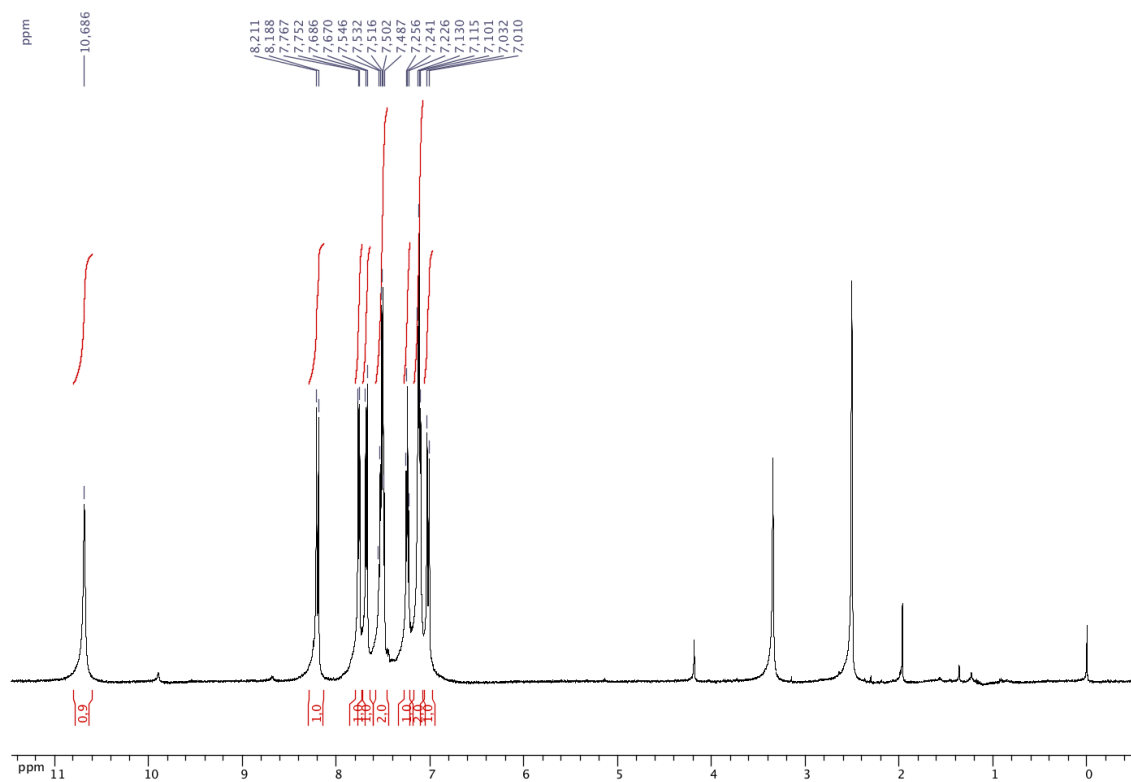

$^1\text{H}$  NMR (DMSO- $d_6$ , 500.4 MHz) of 2-(2,6-difluorophenyl)-2,1-borazanaphthalene (**10c**)

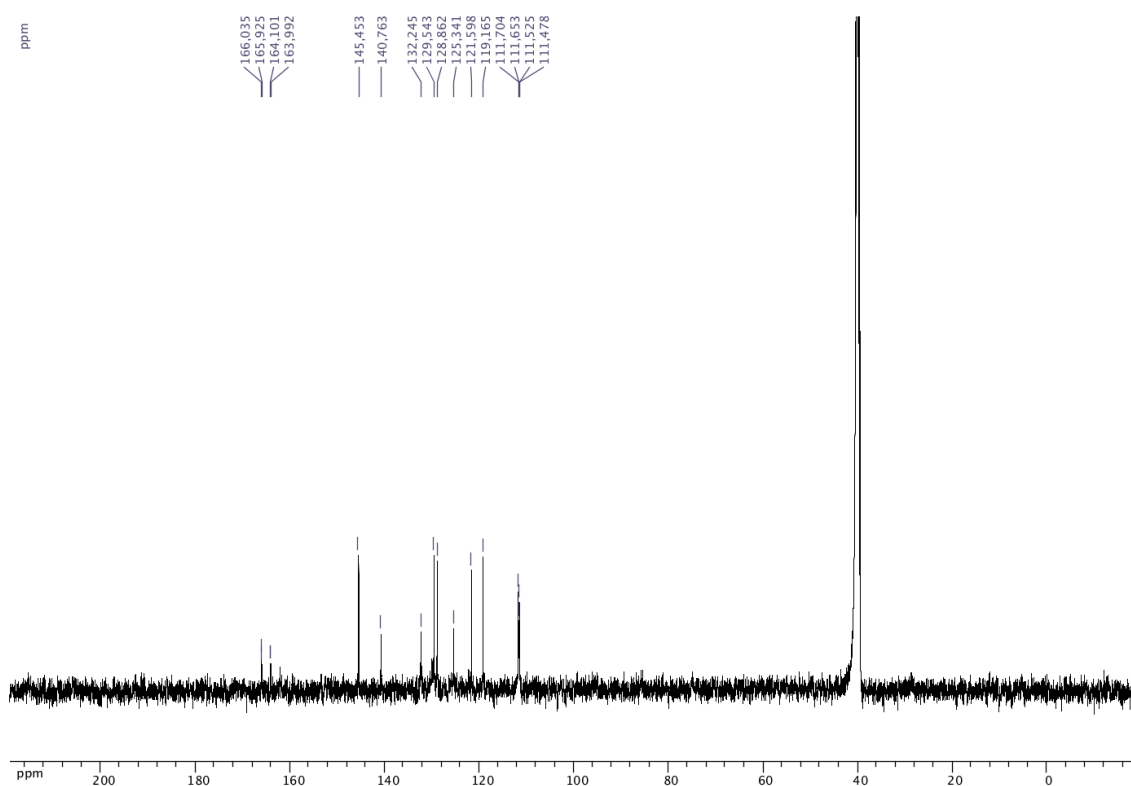

$^{13}\text{C}$   $\{^1\text{H}\}$  NMR (DMSO- $d_6$ , 125.8 MHz) of 2-(2,6-difluorophenyl)-2,1-borazanaphthalene (**10c**)

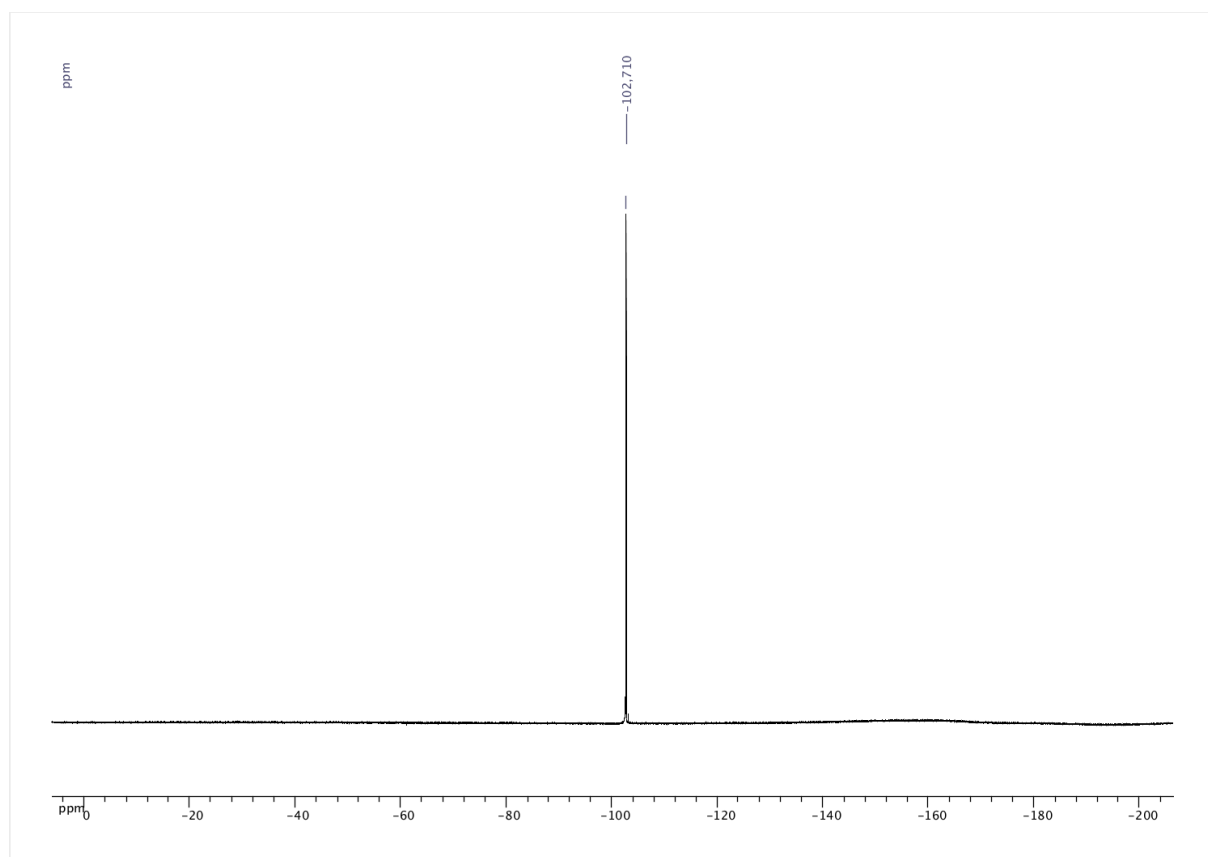

$^{19}\text{F}$   $\{^1\text{H}\}$  NMR (DMSO- $d_6$ , 470.8 MHz) of 2-(2,6-difluorophenyl)-2,1-borazanaphthalene (**10c**)

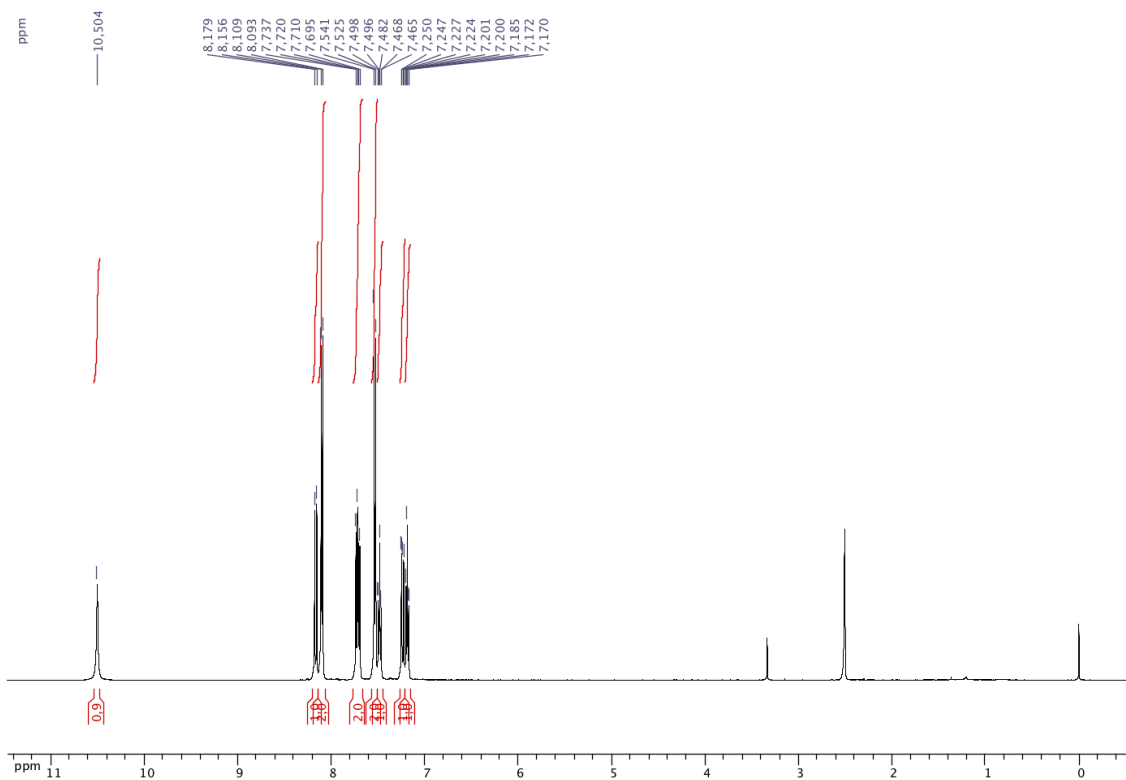

$^1\text{H}$  NMR (DMSO- $d_6$ , 500.4 MHz) of 2-(4-chlorophenyl)-2,1-borazanaphthalene (**10d**)

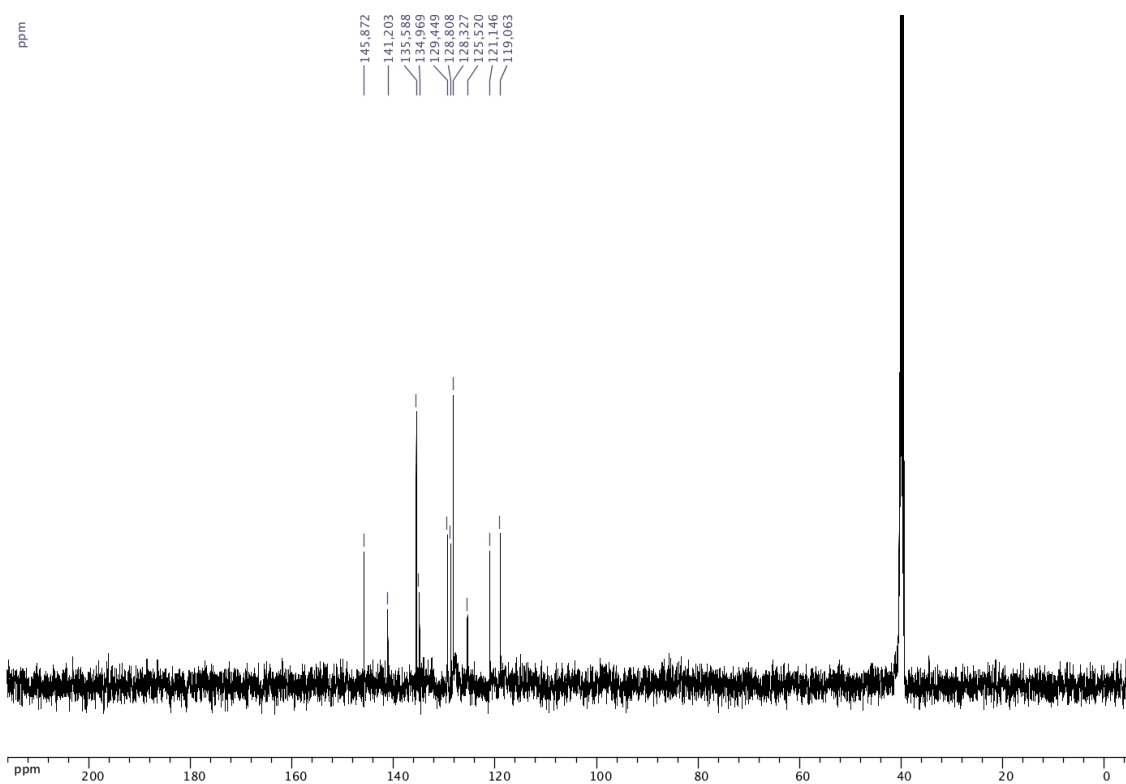

$^{13}\text{C}$   $\{^1\text{H}\}$  NMR (DMSO- $d_6$ , 125.8 MHz) of 2-(4-chlorophenyl)-2,1-borazanaphthalene (**10d**)

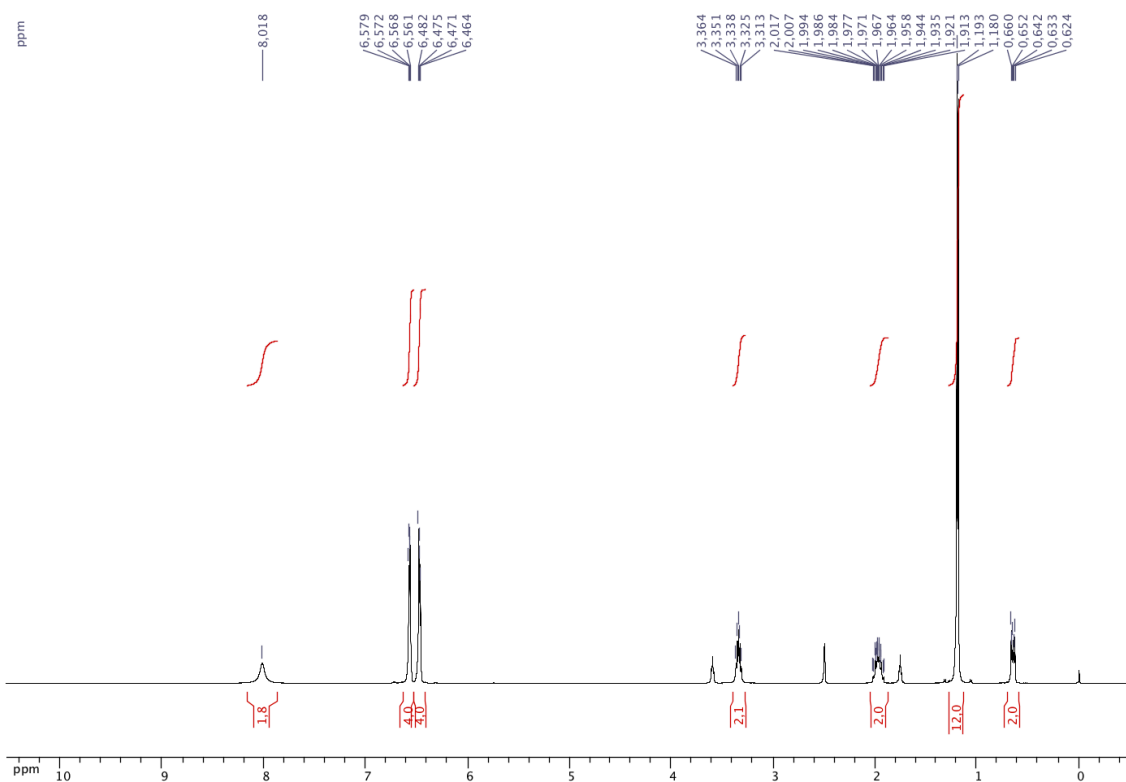

$^1\text{H}$  NMR (DMSO- $d_6$ , 500.4 MHz) of diisopropylammonium 3,3,3-trifluoropropylbis(catecholato)silicate (**11a**)

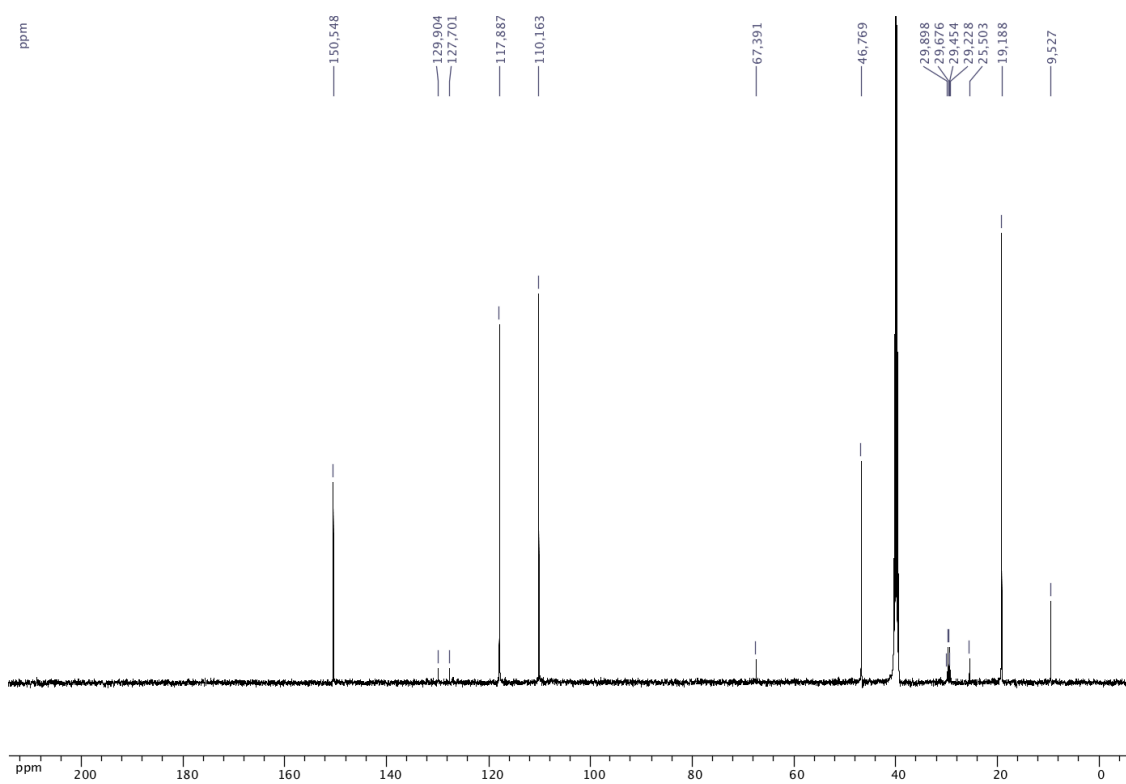

$^{13}\text{C}$   $\{^1\text{H}\}$  NMR (DMSO- $d_6$ , 125.8 MHz) of diisopropylammonium 3,3,3-trifluoropropylbis(catecholato)silicate (**11a**)

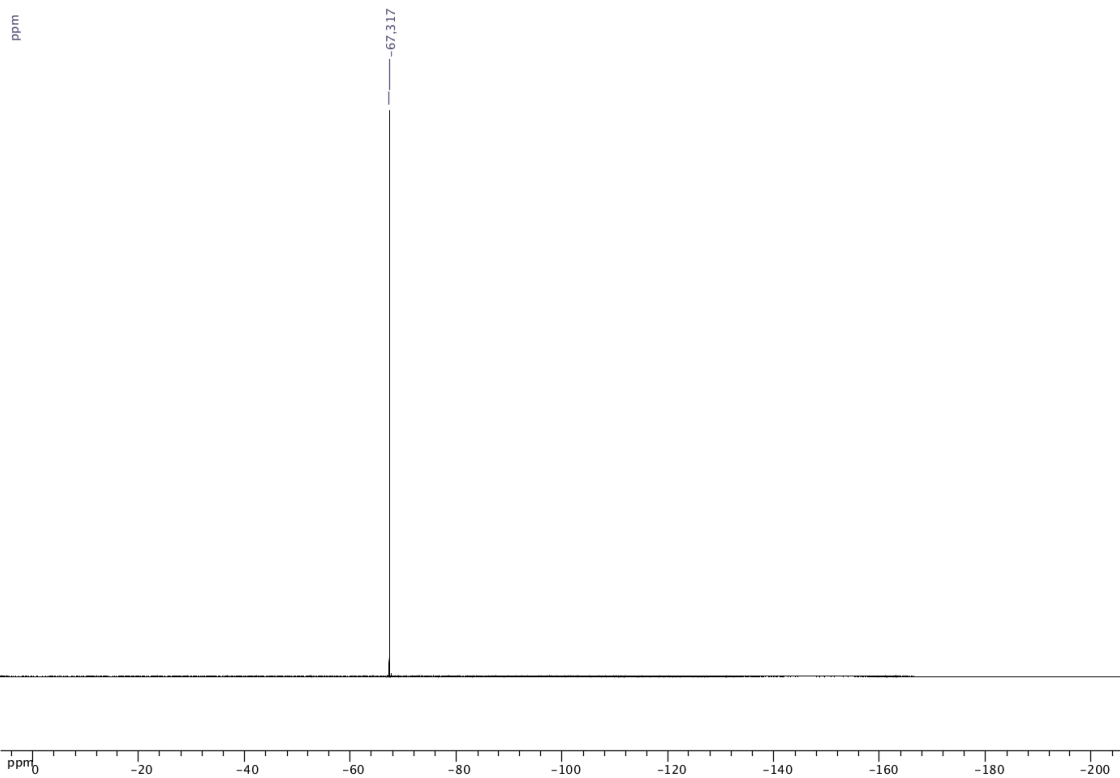

$^{19}\text{F}$   $\{^1\text{H}\}$  NMR (DMSO- $d_6$ , 470.8 MHz) of diisopropylammonium 3,3,3-trifluoropropylbis(catecholato)silicate (**11a**)

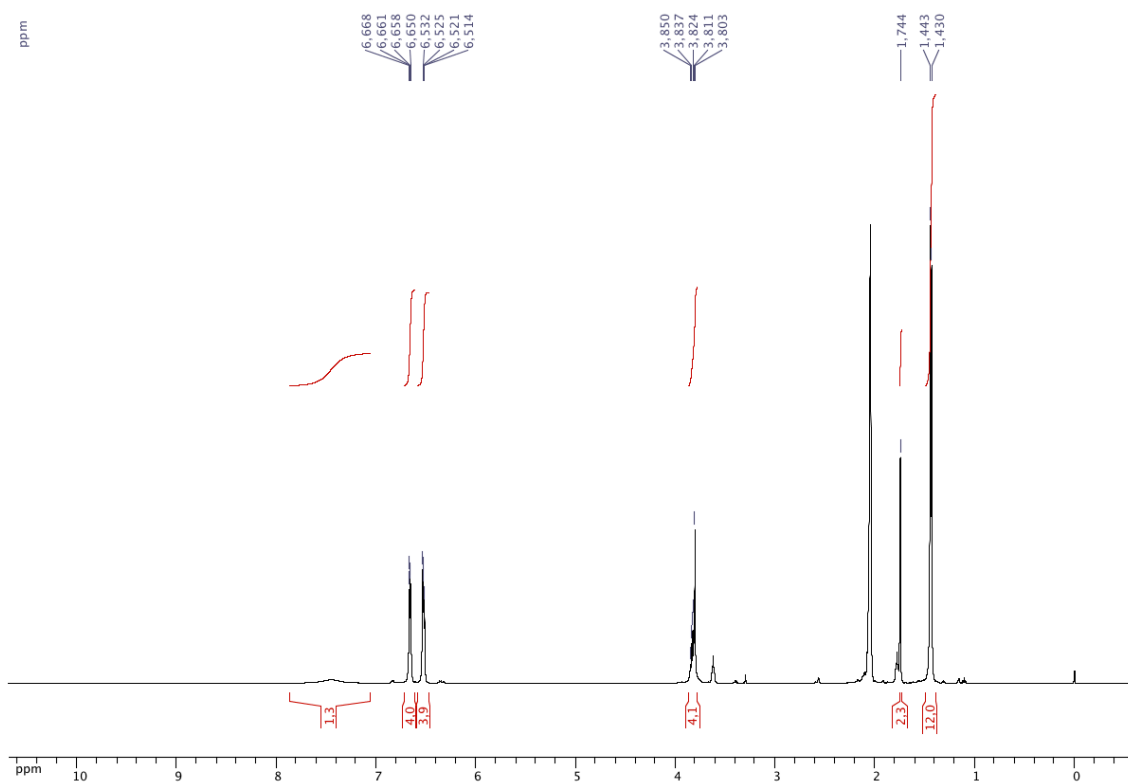

$^1\text{H}$  NMR (acetone- $d_6$ , 500.4 MHz) of diisopropylammonium acetoxymethylbis(catecholato)silicate (**11b**)

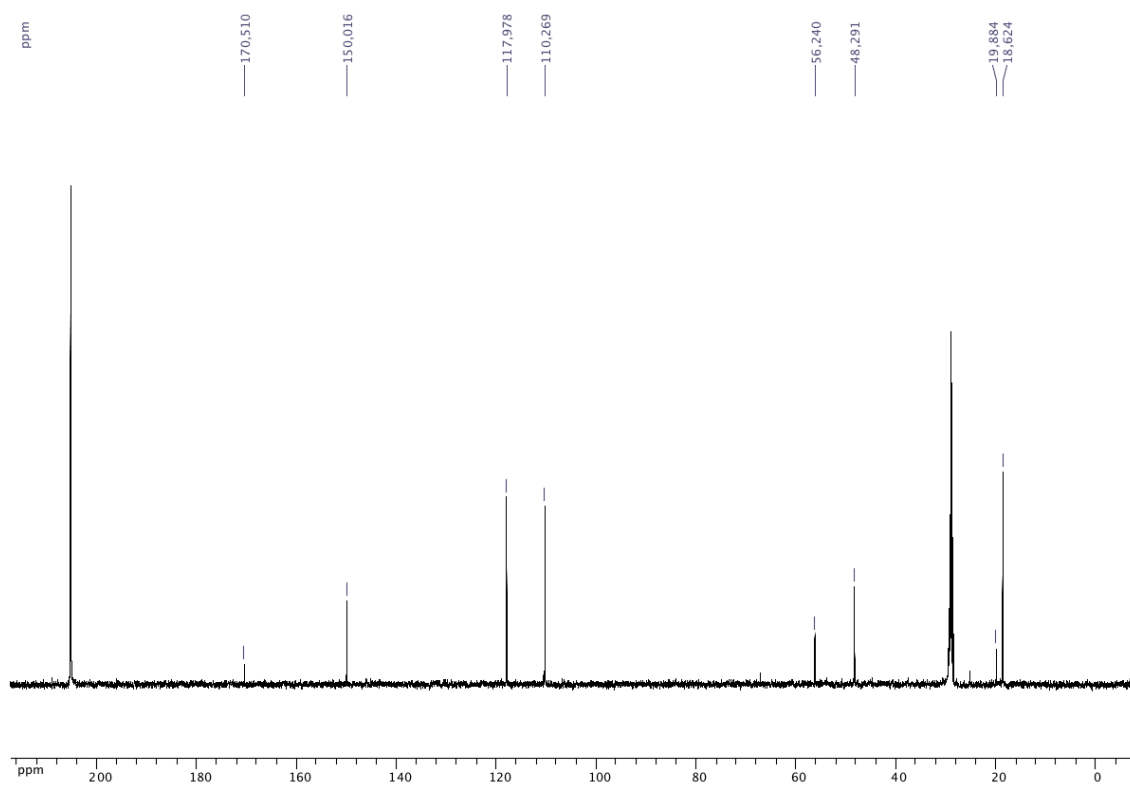

$^{13}\text{C}$   $\{^1\text{H}\}$  NMR (acetone- $d_6$ , 125.8 MHz) of diisopropylammonium acetoxymethylbis(catecholato)silicate (**11b**)

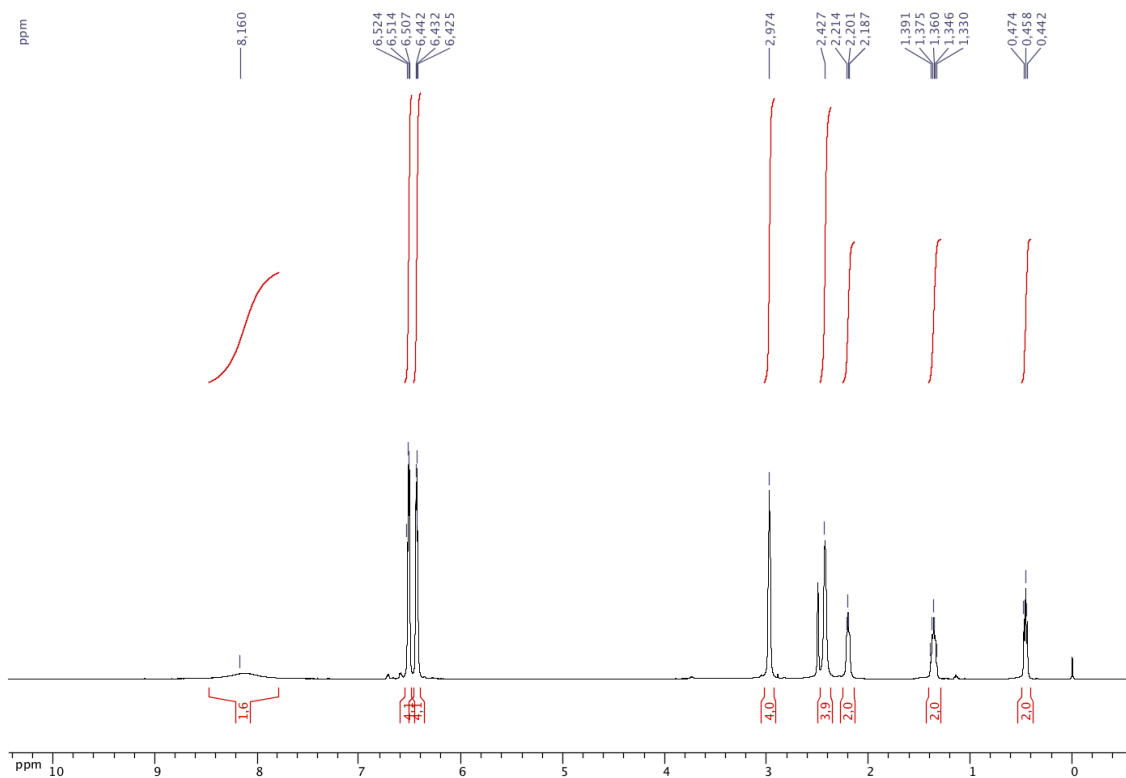

$^1\text{H}$  NMR (DMSO- $d_6$ , 500.4 MHz) of 3-(piperazin-1-ium-1-yl)propylbis(catecholato)silicate (**11c**)

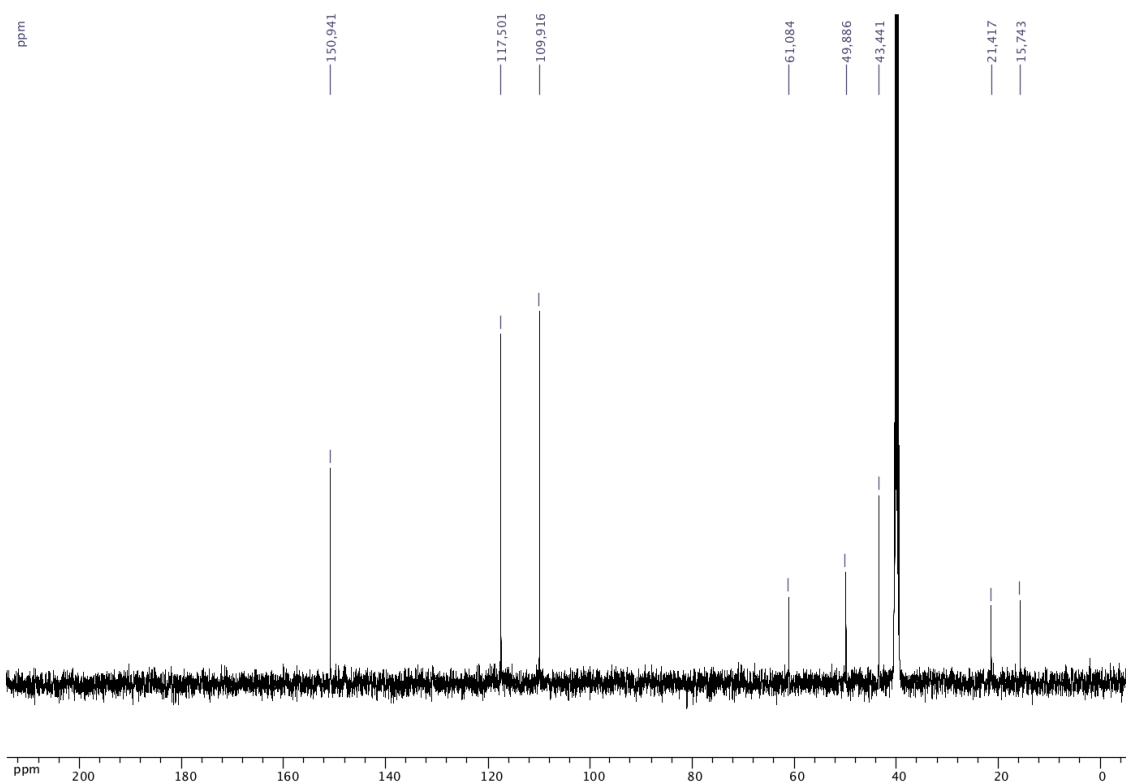

$^{13}\text{C}$   $\{^1\text{H}\}$  NMR (DMSO- $d_6$ , 125.8 MHz) of 3-(piperazin-1-ium-1-yl)propylbis(catecholato)silicate (**11c**)



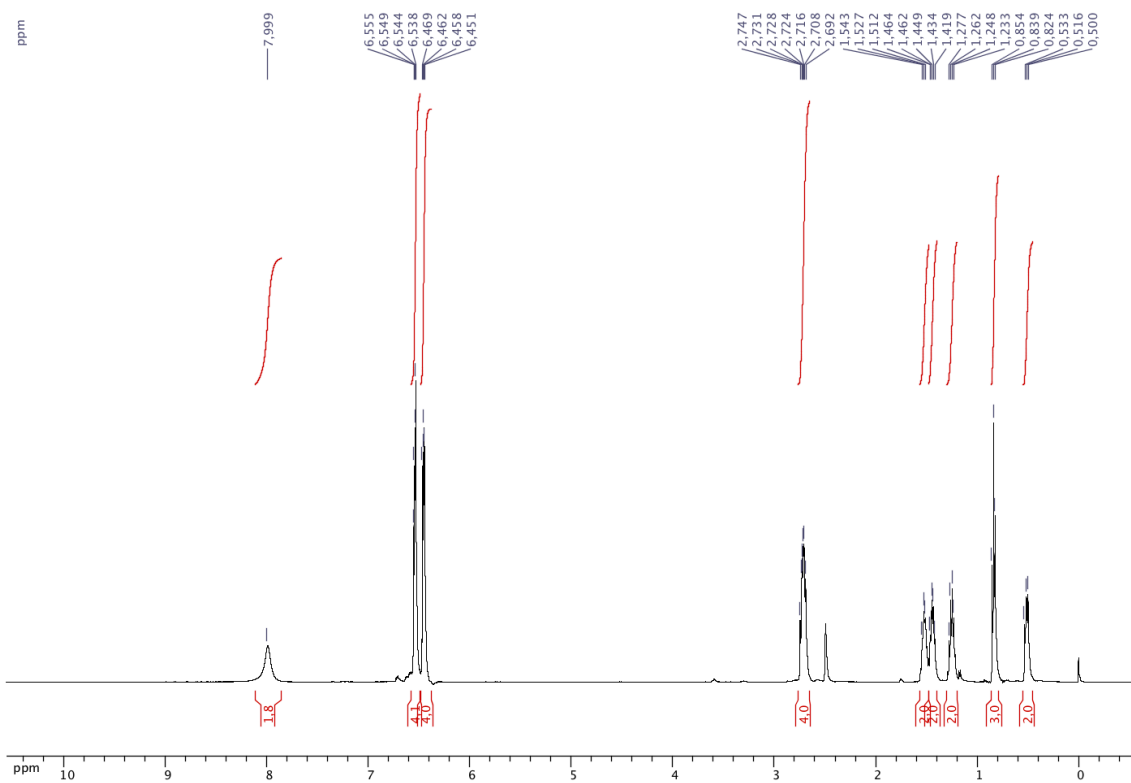

$^1\text{H}$  NMR (DMSO- $d_6$ , 500.4 MHz) of 3-(butylammonio)propylbis(catecholato)silicate (**11d**)

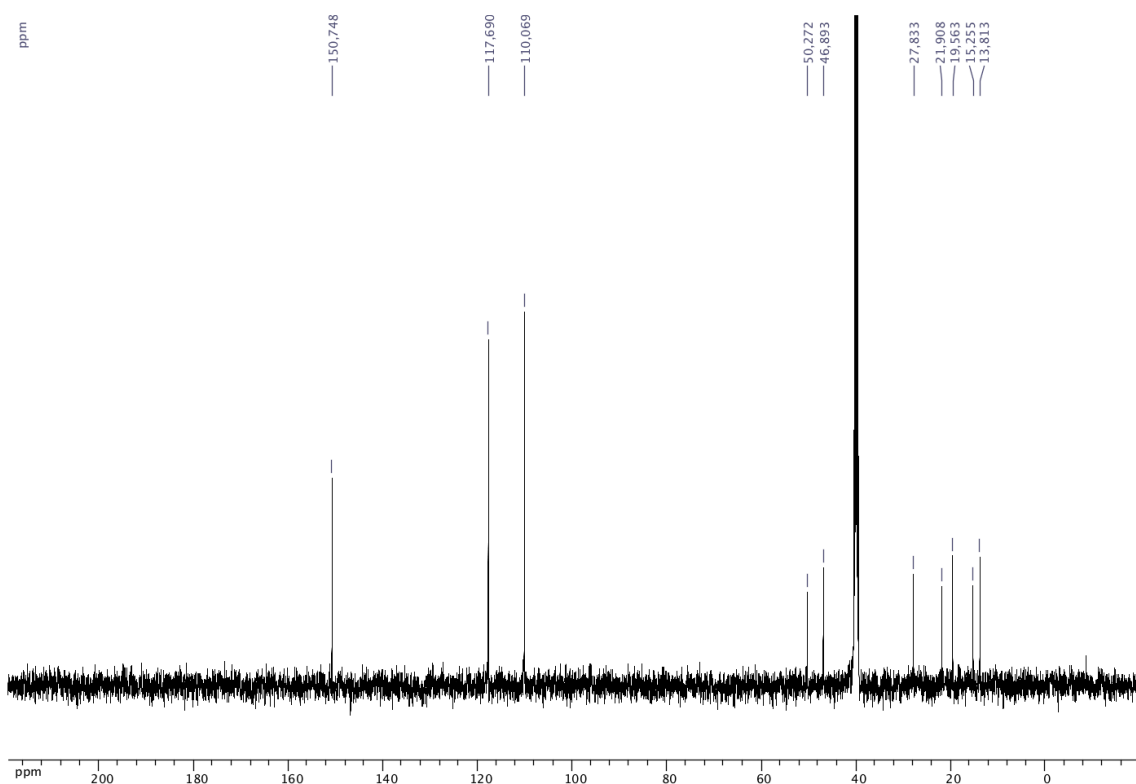

$^{13}\text{C}$   $\{^1\text{H}\}$  NMR (DMSO- $d_6$ , 125.8 MHz) of 3-(butylammonio)propylbis(catecholato)silicate (**11d**)
